# Supplementary material for: Free spermidine evokes superoxide radicals that manifest toxicity
Source: eLife journal article supplement (doi:10.7554/elife.77704), 2022-04-12

# HPLC profiles of dansylated samples

(Peak 1: Hexane diamine int STD; Peak 2: Spermidine)

## WT samples (triplicate)

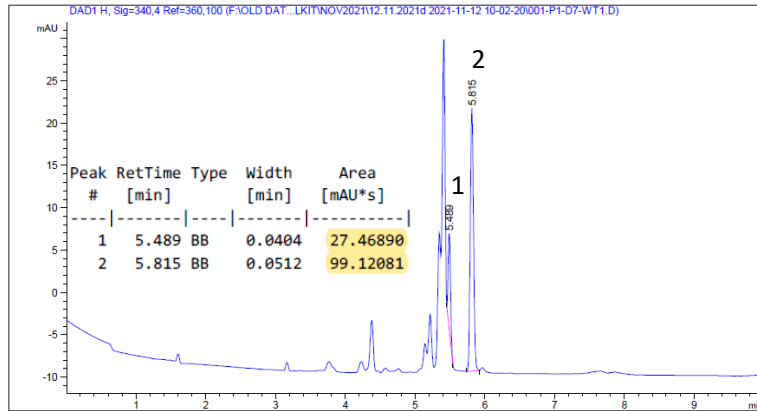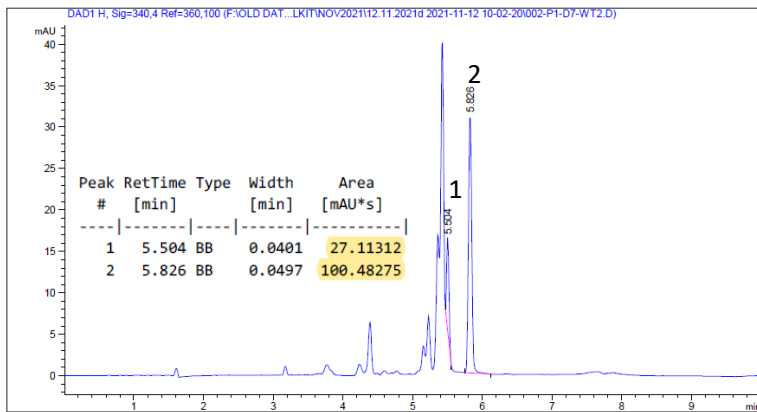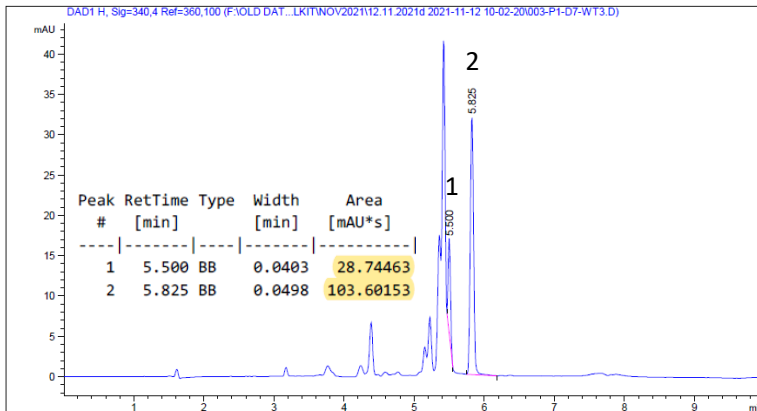

## WT+spermidine samples (triplicate)

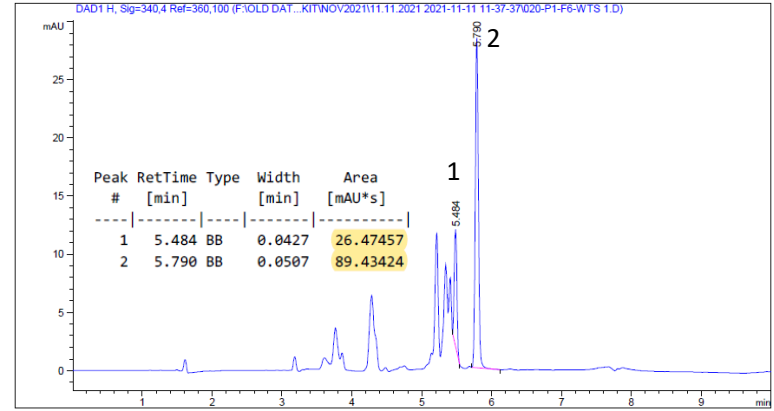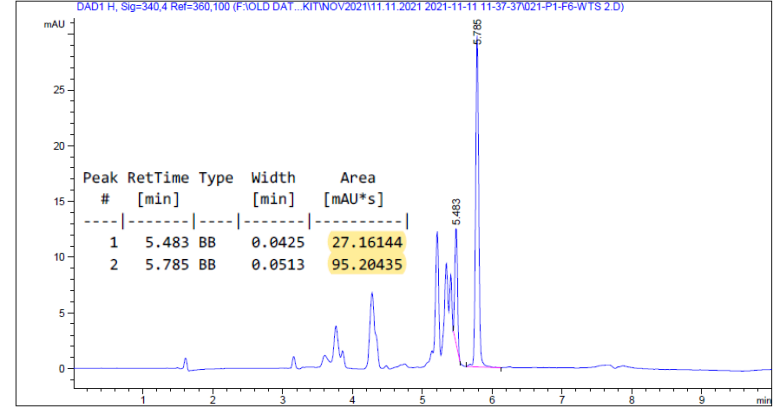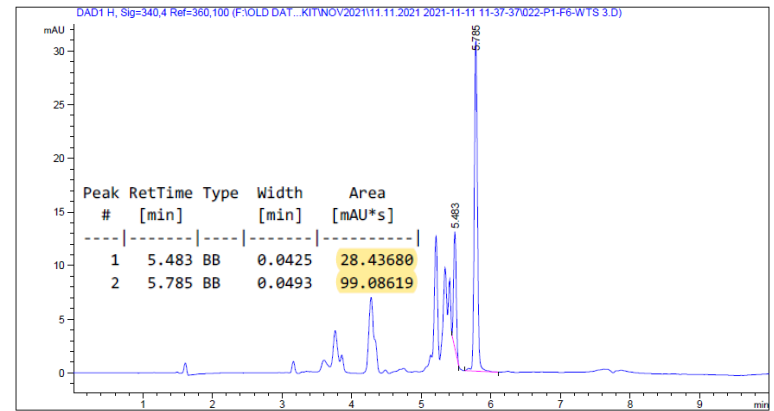

# HPLC profiles of dansylated samples

(Peak 1: Hexane diamine int STD; Peak 2: Spermidine)

## *ΔspeG* samples (triplicate)

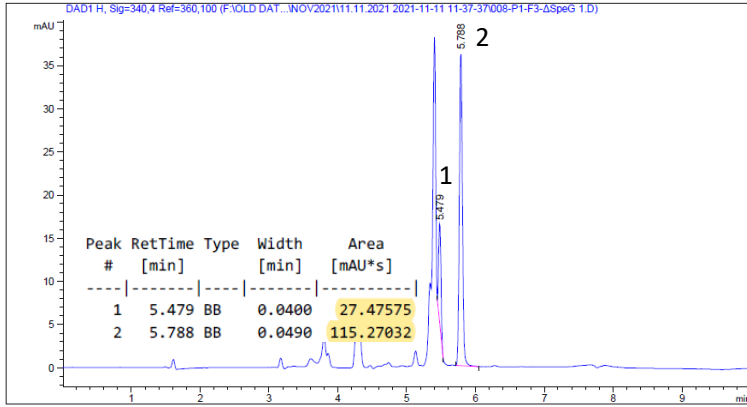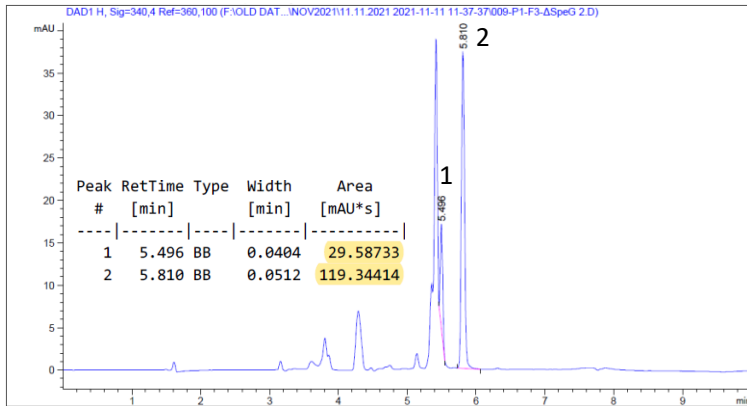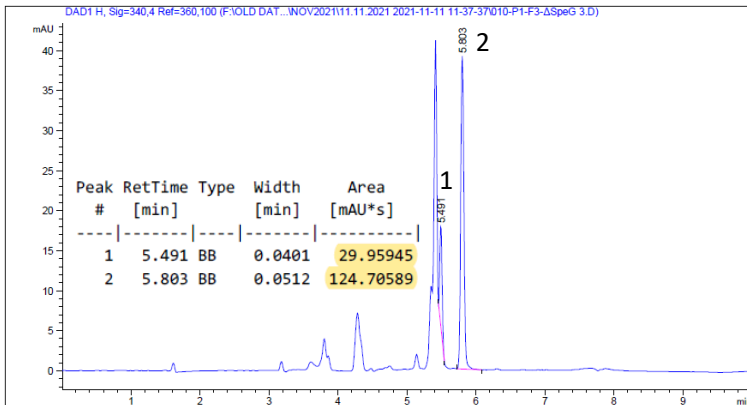

## *ΔspeG* +spermidine samples (triplicate)

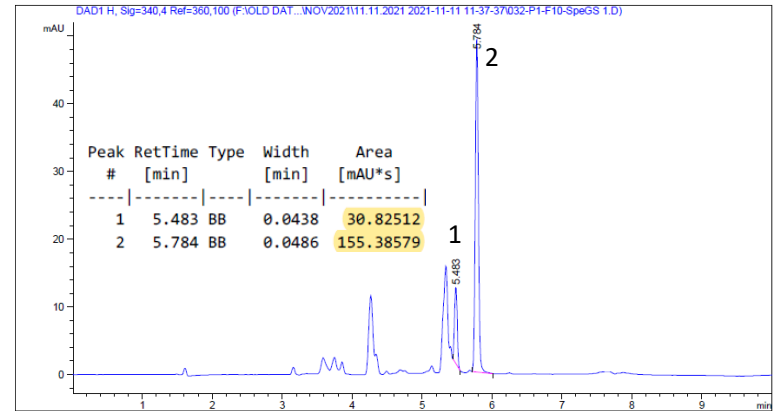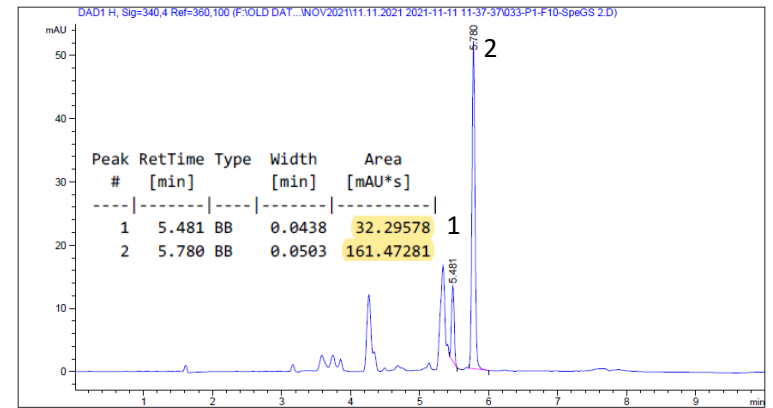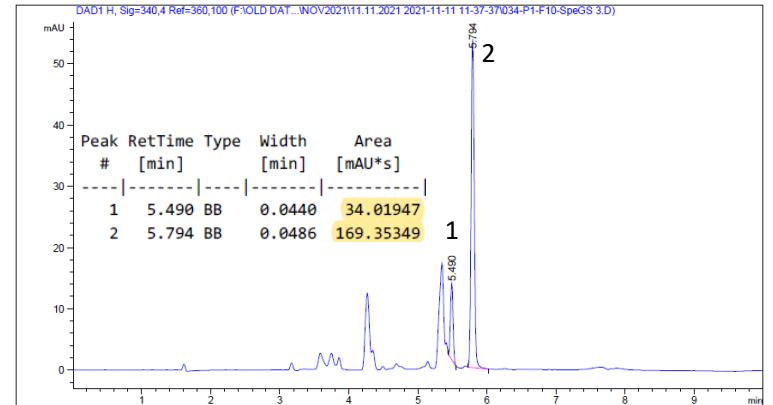

# HPLC profiles of dansylated samples

## $\Delta speE$ samples (triplicate)

(Peak 1: Hexane diamine int STD; Peak 2: Spermidine)

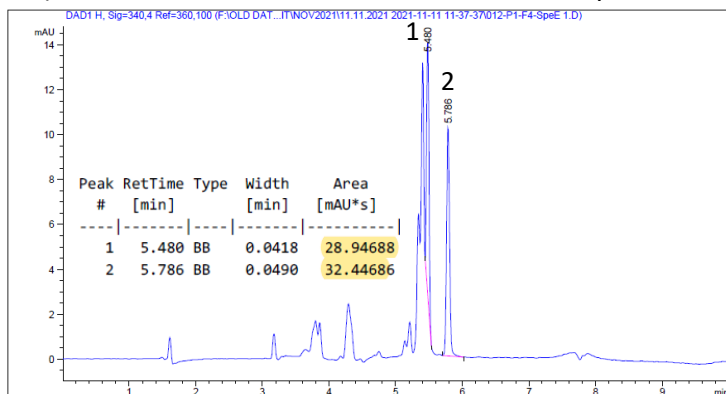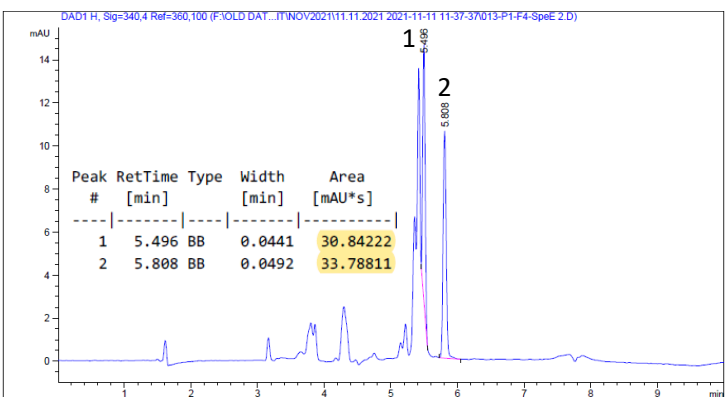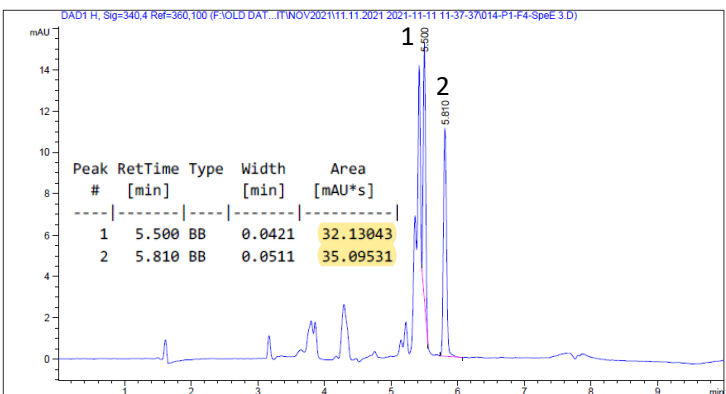

## Pure dansylated-spermidine peak

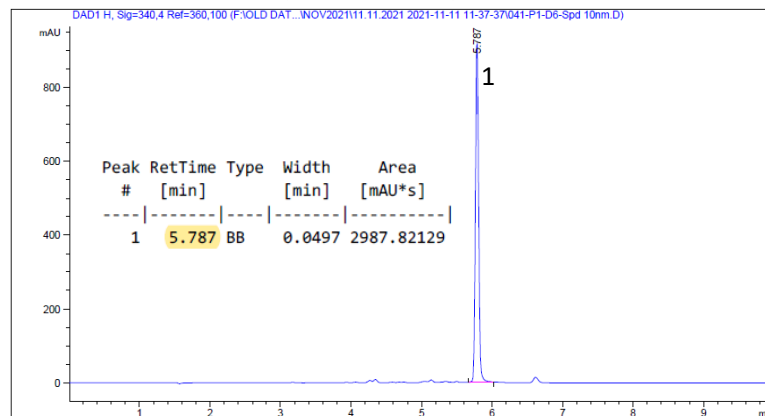

## Pure dansylated-Hexane-diamine peak

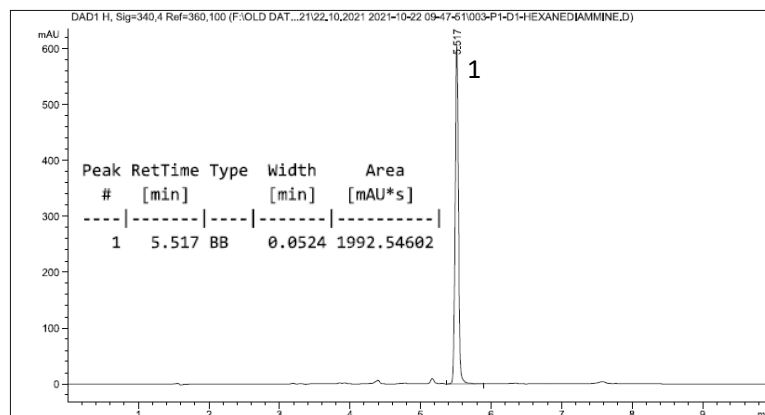

Supplement: supp [file elife-77704-supp-v1.zip]
