# Supplementary material for: Free spermidine evokes superoxide radicals that manifest toxicity
Source: eLife. 2022 Apr 13;11:e77704. doi: 10.7554/eLife.77704 (PMC9038194; doi:10.7554/eLife.77704)
Supplement: Figure 1—figure supplement 1—source data 1. [file elife-77704-fig1-figsupp1-data1.xlsx]

## Sheet: Sheet1
Standard curve SPD
amount (nmol)	mAu*s
0	0
0.625	230
1.25	438
2.5	872
3.75	1246.7
5	1651
10	2987.5

## Sheet: Sheet2
HPLC profiles area
Samples	Area (target)				Area (Int STD)					Area average of Int STD
WT	99.12	100.48	103.6		27.47	27.11	28.74			29.44
ΔspeG	115.27	119.34	124.71		27.48	29.59	29.96
ΔspeE	32.45	33.79	35.1		28.95	30.84	32.13
WT+spd	89.43	95.2	99.1		26.47	27.16	28.44
ΔspeG+spd	155.39	161.47	169.35		30.83	32.39	34.02
Internal standard correction
Samples					Pellet weights (mg) of the total samples
WT	106.228	109.116	106.123		49.5	52	54.5
ΔspeG	123.492	118.735	122.545		49	53.5	52.5
ΔspeE	32.9992	32.2561	32.1613		50	49.5	55
WT+spd	99.4643	103.192	102.585		41.5	46.5	51.5
ΔspeG+spd	148.384	146.764	146.551		47	44.5	43
Pellet weight correction for 50mg each
Samples
WT	107.301	104.919	97.3608
ΔspeG	126.012	110.967	116.71
ΔspeE	32.9992	32.5819	29.2376
WT+spd	119.836	110.959	99.5966
ΔspeG+spd	157.855	164.903	170.408
Coversion to nmol from standard curve equation
Samples	nmol/per 10 ul of injected samples					Total final sample volume 2 ml/50mg of pellet
WT	0.345955	0.338274	0.313905			Thus multiplying with 200 will give total amount in 50mg pellet
ΔspeG	0.40628	0.357774	0.37629			Thus multiplying with 400 will give total amount in 100 mg pellet
ΔspeE	0.106394	0.105049	0.0942661
WT+spd	0.38637	0.357747	0.321114
ΔspeG+spd	0.508948	0.531671	0.54942
HPLC profiles area
Samples	nmol/100mg					Ave	SD
WT	138.382	135.31	125.562		WT	133.085	6.69332
ΔspeG	162.512	143.11	150.516		ΔspeG	152.046	9.7912
ΔspeE	42.5577	42.0195	37.7065		ΔspeE	40.7612	2.65915
WT+spd	154.548	143.099	128.445		WT+spd	142.031	13.084
ΔspeG+spd	203.579	212.668	219.768		ΔspeG+spd	212.005	8.11468
