# Supplementary material for: Free spermidine evokes superoxide radicals that manifest toxicity
Source: eLife. 2022 Apr 13;11:e77704. doi: 10.7554/eLife.77704 (PMC9038194; doi:10.7554/eLife.77704)
Supplement: Figure 1—source data 1. [file elife-77704-fig1-data1.xlsx]

## Sheet: Sheet1
Day1								Day2
	stained-unstained			After normalisation					stained-unstained			After normalisation
WT	78	95	79	1	1	1		WT	68	72	73	1	1	1
ΔspeG	32	63	91	0.410256	0.663158	1.1519		ΔspeG	71	70	59	1.04412	0.972222	0.808219
ΔspeE	122	105	190	1.5641	1.10526	2.40506		ΔspeE	96	92	100	1.41176	1.27778	1.36986
WT + spd	43	24	49	0.551282	0.252632	0.620253		WT + spd	43	60	34	0.632353	0.833333	0.465753
ΔspeG + spd	26	26	31	0.333333	0.273684	0.392405		ΔspeG + spd	35	37	33	0.514706	0.513889	0.452055
ΔspeE + spd	67	61	42	0.858974	0.642105	0.531646		ΔspeE + spd	49	51	60	0.720588	0.708333	0.821918
Combined
WT	1	1	1	1	1	1		1	0		WT	1	0
ΔspeG	0.410256	0.663158	1.1519	1.04412	0.972222	0.808219		0.841645	0.273267		ΔspeG	0.841645	0.273267
ΔspeE	1.5641	1.10526	2.40506	1.41176	1.27778	1.36986		1.52231	0.458298		ΔspeE	1.52231	0.458298
WT + spd	0.551282	0.252632	0.620253	0.632353	0.833333	0.465753		0.559268	0.193394		WT + spd	0.559268	0.193394
ΔspeG + spd	0.333333	0.273684	0.392405	0.514706	0.513889	0.452055		0.413345	0.098211		ΔspeG + spd	0.413345	0.098211
ΔspeE + spd	0.858974	0.642105	0.531646	0.720588	0.708333	0.821918		0.713927	0.119299		ΔspeE + spd	0.713927	0.119299
										WT	1	0.559268		0	0.193394
										ΔspeG	0.841645	0.413345		0.273267	0.098211
										ΔspeE	1.52231	0.713927		0.458298	0.119299
															P value between del-speG+/-SPD:
															The two-tailed P value equals 0.0047
															By conventional criteria, this difference is considered to be very statistically significant.
															P value between WT +/-SPD
															The two-tailed P value equals 0.0002
															By conventional criteria, this difference is considered to be extremely statistically significant.
															P value between del-speE +/-SPD
															The two-tailed P value is less than 0.0001
															By conventional criteria, this difference is considered to be extremely statistically significant.
															P value between Wt and del-speE
															The two-tailed P value equals 0.0020
															By conventional criteria, this difference is considered to be very statistically significant.
