# Supplementary material for: Free spermidine evokes superoxide radicals that manifest toxicity
Source: eLife. 2022 Apr 13;11:e77704. doi: 10.7554/eLife.77704 (PMC9038194; doi:10.7554/eLife.77704)
Supplement: Figure 1—source data 2. [file elife-77704-fig1-data2.xlsx]

## Sheet: Sheet1
Superoxide Detection MFI values
Day 1					Day2
	St-Unst					Stained-Unstained
WT	93.61	95.02	95.17		WT	62	59	63
ΔspeG	109	112	119		ΔspeG	51	54	58
ΔspeE	155.33	164.32	161.13		ΔspeE	78	76	90
WT+spd	108.89	105.89	99.89		WT+spd	66	60	64
ΔspeG+spd	162.43	172.06	172.54		ΔspeG+spd	133	128	139
ΔspeE+spd	100	109	100		ΔspeE+spd	72	102	73
WT+spd +Tiron	96.78	97.54	89.78		WT+spd +Tiron	80	75	61
ΔspeG+spd +Tiron	148.06	142.87	139.06		ΔspeG+spd +Tiron	53	60	53
ΔspeE+spd+Tiron	104.33	104.73	125.82		ΔspeE+spd+Tiron	49	53	47
	St-UnSt							Normalized							Ave
WT	93.61	95.02	95.17	62	59	63		1	1	1	1	1	1		1	1.21619e-16
WT+spd	108.89	105.89	99.89	66	60	64		1.16323	1.1144	1.0496	1.06452	1.01695	1.01587		1.07076	0.0580518
WT+spd +Tiron	96.78	97.54	89.78	80	75	61		1.03386	1.02652	0.943365	1.29032	1.27119	0.968254		1.08892	0.152614
ΔspeG	109	112	119	51	54	58		1.16441	1.1787	1.25039	0.822581	0.915254	0.920635		1.04199	0.176656
ΔspeG+spd	162.43	172.06	172.54	133	128	139		1.73518	1.81078	1.81297	2.14516	2.16949	2.20635		1.97999	0.214892
ΔspeG+spd +Tiron	148.06	142.87	139.06	53	60	53		1.58167	1.50358	1.46117	0.854839	1.01695	0.84127		1.20991	0.342574
ΔspeE	155.33	164.32	161.13	78	76	90		1.65933	1.72932	1.69308	1.25806	1.28814	1.42857		1.50942	0.211302
ΔspeE+spd	100	109	100	72	102	73		1.06826	1.14713	1.05075	1.16129	1.72881	1.15873		1.21916	0.254192
ΔspeE+spd+Tiron	104.33	104.73	125.82	49	53	47		1.11452	1.10219	1.32206	0.790323	0.898305	0.746032		0.99557	0.221795
WT	1	1.21619e-16							WT	1	1.07076	1.08892		0	0.0580518	0.152614
WT+spd	1.07076	0.0580518							ΔspeG	1.04199	1.97999	1.20991		0.176656	0.214892	0.342574
WT+spd +Tiron	1.08892	0.152614							ΔspeE	1.50942	1.21916	0.99557		0.211302	0.254192	0.221795
ΔspeG	1.04199	0.176656
ΔspeG+spd	1.97999	0.214892
ΔspeG+spd +Tiron	1.20991	0.342574
ΔspeE	1.50942	0.211302
ΔspeE+spd	1.21916	0.254192
ΔspeE+spd+Tiron	0.99557	0.221795
