# Supplementary material for: Free spermidine evokes superoxide radicals that manifest toxicity
Source: eLife. 2022 Apr 13;11:e77704. doi: 10.7554/eLife.77704 (PMC9038194; doi:10.7554/eLife.77704)
Supplement: Figure 1—source data 3. [file elife-77704-fig1-data3.xlsx]

## Sheet: Sheet1
H2O2 detection		red fluorescent product (λex = 540/λem = 590 nm) using a Tecan microplate reader
from 3 mg cell pellets dissolved in 500 ul of minimal media
	ExpI						ExpII						ExpIII
Time(mins)	BW	ΔspeG	BW+spd	ΔspeG+spd	DspeE		BW	ΔspeG	BW+spd	ΔspeG+spd	DspeE		BW	ΔspeG	BW+spd	ΔspeG+spd	DspeE
0	1012	1084	998	1567	1263		1111	1012	1002	1622	1286		1013	1899	1185	1669	1278
60	21548	11568	15003	8031	10765		20016	12045	14405	7835	12870		23317	16823	17848	6994	11098
120	27107	19693	18030	7887	15392		26215	19922	18598	8142	16662		30220	27620	23886	6341	14580
180	26115	23412	18907	8449	14660		27304	23583	18460	8415	13020		23172	25402	25854	6010	15221
240	24572	19851	17175	6998	10699		24383	21680	18778	6712	9494		21477	11937	15248	6049	11899
300	23501	18997	16788	7009	10769		22987	18880	16997	6998	11204		20946	12601	14388	5446	11867
0	0	0	0	0	0		0	0	0	0	0		0	0	0	0	0
60	20536	10484	14005	6464	9502		18905	11033	13403	6213	11584		22304	14924	16663	5325	9820
120	26095	18609	17032	6320	14129		25104	18910	17596	6520	15376		29207	25721	22701	4672	13302
180	25103	22328	17909	6882	13397		26193	22571	17458	6793	11734		22159	23503	24669	4341	13943
240	23560	18767	16177	5431	9436		23272	20668	17776	5090	8208		20464	10038	14063	4380	10621
300	22489	17913	15790	5442	9506		21876	17868	15995	5376	9918		19933	10702	13203	3777	10589
Time	Mean						SD
0	0	0	0	0	0		0	0	0	0	0
60	20581.7	12147	14690.3	6000.67	10302		1699.96	2420.57	1734.69	598.452	1121.57
120	26802	21080	19109.7	5837.33	14269		2140.92	4022.04	3122.94	1014.15	1044.06
180	24485	22800.7	20012	6005.33	13024.7		2086.8	620.255	4039.38	1442.04	1150.61
240	22432	16491	16005.3	4967	9421.67		1710.41	5668.72	1862.44	536.187	1206.56
300	21432.7	15494.3	14996	4865	10004.3		1334.43	4150.34	1556.16	942.813	546.637
	In uM From standard curve
0	0.000826582	0.000826582	0.000826582	0.000826582	0.000826582		0.000826582	0.000826582	0.000826582	0.000826582	0.000826582
60	0.798597	0.471659	0.570241	0.23342	0.400144		0.0667191	0.0946507	0.0680654	0.0240233	0.0443001
120	1.0397	0.817913	0.74154	0.227089	0.55391		0.0838112	0.156726	0.121876	0.0401363	0.0412957
180	0.949894	0.884608	0.776516	0.2336	0.505678		0.0817134	0.0248684	0.157398	0.0567218	0.0454254
240	0.870318	0.640037	0.621212	0.193353	0.366022		0.0671241	0.220553	0.0730171	0.0216098	0.0475944
300	0.831582	0.601405	0.582089	0.1894	0.388606		0.0525505	0.161699	0.0611453	0.0373712	0.0220149

## Sheet: Sheet2
In uM From standard curve
Time(mins)	BW	ΔspeE	ΔspeG	BW+spd	ΔspeG+spd		SD
0	0.000826582	0.000826582	0.000826582	0.000826582	0.000826582		0.000826582	0.000826582	0.000826582	0.000826582	0.000826582
60	0.798597	0.400144	0.471659	0.570241	0.23342		0.0667191	0.0443001	0.0946507	0.0680654	0.0240233
120	1.0397	0.55391	0.817913	0.74154	0.227089		0.0838112	0.0412957	0.156726	0.121876	0.0401363
180	0.949894	0.505678	0.884608	0.776516	0.2336		0.0817134	0.0454254	0.0248684	0.157398	0.0567218
240	0.870318	0.366022	0.640037	0.621212	0.193353		0.0671241	0.0475944	0.220553	0.0730171	0.0216098
300	0.831582	0.388606	0.601405	0.582089	0.1894		0.0525505	0.0220149	0.161699	0.0611453	0.0373712
										Unpaired t test results (Between WT and DspeE at hour 3)
										P value and statistical significance:
										The two-tailed P value is less than 0.0001
										By conventional criteria, this difference is considered to be extremely statistically significant.
										Unpaired t test results (Between DspeG and DspeG+SPD at hour 3)
										P value and statistical significance:
										The two-tailed P value is less than 0.0001
										By conventional criteria, this difference is considered to be extremely statistically significant.
