# Supplementary material for: Free spermidine evokes superoxide radicals that manifest toxicity
Source: eLife. 2022 Apr 13;11:e77704. doi: 10.7554/eLife.77704 (PMC9038194; doi:10.7554/eLife.77704)
Supplement: Figure 1—source data 4. [file elife-77704-fig1-data4.xlsx]

## Sheet: Sheet1
	Number of colonies counted			dilution factors 10^6 for all except speGsodA which is 10^5
	0 hr	1hr	2hr	4hr	6hr
WT+pDAK1	420	535	1060	1620	2620		1	1.27381	2.52381	3.85714	6.2381
speG+pDAK1	585	99	78	27	4		1	0.169231	0.133333	0.0461538	0.00683761
speGsodA+pDAK1	530	70	23	3	3		1	0.132075	0.0433962	0.00566038	0.00566038
speGsodB+pDAK1	480	128	87	14	6		1	0.266667	0.18125	0.0291667	0.0125
speGsodAsodB+pDAK1	3960	48	26	3	2		1	0.0121212	0.00656566	0.000757576	0.000505051		Plated 10 times more except 0 time point; 0 time point multiplied by 10
speGsodA+psodA	200	360	300	230	90		1	1.8	1.5	1.15	0.45
WT+pDAK1	348	550	1360	2100	2980		1	1.58046	3.90805	6.03448	8.56322
speG+pDAK1	544	110	35	21	9		1	0.202206	0.0643382	0.0386029	0.0165441
speGsodA+pDAK1	496	87	14	8	1		1	0.175403	0.0282258	0.016129	0.00201613
speGsodB+pDAK1	475	85	55	11	8		1	0.178947	0.115789	0.0231579	0.0168421
speGsodAsodB+pDAK1	5060	116	39	8	4		1	0.0229249	0.00770751	0.00158103	0.000790514		Plated 10 times more except 0 time point; 0 time point multiplied by 10
speGsodA+psodA	185	305	287	278	74		1	1.64865	1.55135	1.5027	0.4
WT+pDAK1	335	570	1330	1790	2510		1	1.70149	3.97015	5.34328	7.49254
speG+pDAK1	410	98	48	13	2		1	0.239024	0.117073	0.0317073	0.00487805
speGsodA+pDAK1	520	96	9	11	1		1	0.184615	0.0173077	0.0211538	0.00192308
speGsodB+pDAK1	565	115	70	18	2		1	0.20354	0.123894	0.0318584	0.00353982
speGsodAsodB+pDAK1	3650	147	61	6	3		1	0.040274	0.0167123	0.00164384	0.000821918		Plated 10 times more except 0 time point; 0 time point multiplied by 10
speGsodA+psodA	255	390	320	215	56		1	1.52941	1.2549	0.843137	0.219608
WT+pDAK1	1	1	1	1.27381	1.58046	1.70149	2.52381	3.90805	3.97015	3.85714	6.03448	5.34328	6.2381	8.56322	7.49254
speG+pDAK1	1	1	1	0.169231	0.202206	0.239024	0.133333	0.0643382	0.117073	0.0461538	0.0386029	0.0317073	0.00683761	0.0165441	0.00487805
speGsodA+pDAK1	1	1	1	0.132075	0.175403	0.184615	0.0433962	0.0282258	0.0173077	0.00566038	0.016129	0.0211538	0.00566038	0.00201613	0.00192308
speGsodB+pDAK1	1	1	1	0.266667	0.178947	0.20354	0.18125	0.115789	0.123894	0.0291667	0.0231579	0.0318584	0.0125	0.0168421	0.00353982
speGsodAsodB+pDAK1	1	1	1	0.0121212	0.0229249	0.040274	0.00656566	0.00770751	0.0167123	0.000757576	0.00158103	0.00164384	0.000505051	0.000790514	0.000821918
speGsodA+psodA	1	1	1	1.8	1.64865	1.52941	1.5	1.55135	1.2549	1.15	1.5027	0.843137	0.45	0.4	0.219608
																						Unpaired t test results (between speG and triple mutant at 2 hours time point
																						P value and statistical significance:
WT+pDAK1	1	0		1.51859	0.220453		3.46733	0.817707		5.0783	1.11259		7.43128	1.16377								The two-tailed P value equals 0.0034
speG+pDAK1	1	0		0.203487	0.0349144		0.104915	0.0360687		0.0388214	0.00722574		0.00941992	0.00624704								By conventional criteria, this difference is considered to be very statistically significant.
speGsodA+pDAK1	1	0		0.164031	0.0280553		0.0296432	0.0131019		0.0143144	0.00790452		0.00319986	0.00213138
speGsodB+pDAK1	1	0		0.216385	0.0452483		0.140311	0.0356849		0.028061	0.00445439		0.0109606	0.00678343								Unpaired t test results (between speGsodA and speGsodA+ psodA) at 2 hours time point
speGsodAsodB+pDAK1	1	0		0.0251067	0.0142026		0.0103285	0.00555796		0.00132748	0.000494549		0.000705827	0.000174585								P value and statistical significance:
speGsodA+psodA	1	0		1.65935	0.135611		1.43542	0.158426		1.16528	0.330048		0.356536	0.12119								The two-tailed P value equals 0.0001
	Normalized mean						SD															By conventional criteria, this difference is considered to be extremely statistically significant.
WT+pDAK1	1	1.51859	3.46733	5.0783	7.43128		0	0.220453	0.817707	1.11259	1.16377
speG+pDAK1	1	0.203487	0.104915	0.0388214	0.00941992		0	0.0349144	0.0360687	0.00939113	0.00624704
speGsodA+pDAK1	1	0.164031	0.0296432	0.0143144	0.00319986		0	0.0280553	0.0131019	0.00790452	0.00213138
speGsodB+pDAK1	1	0.216385	0.140311	0.028061	0.0109606		0	0.0452483	0.0356849	0.00308435	0.00678343
speGsodAsodB+pDAK1	1	0.0251067	0.0103285	0.00132748	0.000705827		0	0.0142026	0.00555796	0.000494549	0.000174585
speGsodA+psodA	1	1.65935	1.43542	1.16528	0.356536		0	0.135611	0.158426	0.330048	0.12119
x
