# Supplementary material for: Free spermidine evokes superoxide radicals that manifest toxicity
Source: eLife. 2022 Apr 13;11:e77704. doi: 10.7554/eLife.77704 (PMC9038194; doi:10.7554/eLife.77704)
Supplement: Figure 2—source data 1. [file elife-77704-fig2-data1.xlsx]

## Sheet: Sheet1
X [G]	Intensity		KDD_CMH
3188	1446.55
3188.49	2237.55
3188.98	2625.55
3189.47	2203.55
3189.96	1950.55
3190.44	2409.55
3190.93	2668.55
3191.42	2103.55
3191.91	733.546
3192.4	942.546
3192.89	2029.55
3193.38	2300.55
3193.86	1328.55
3194.35	1657.55
3194.84	1079.55
3195.33	1033.55
3195.82	1272.55
3196.31	1321.55
3196.8	2166.55
3197.29	1917.55
3197.78	1728.55
3198.26	898.546
3198.75	1291.55
3199.24	1095.55
3199.73	1350.55
3200.22	1423.55
3200.71	1843.55
3201.2	2217.55
3201.69	2407.55
3202.17	2529.55
3202.66	2356.55
3203.15	2328.55
3203.64	1280.55
3204.13	816.546
3204.62	634.546
3205.11	416.546
3205.6	838.546
3206.08	1376.55
3206.57	1876.55
3207.06	983.546
3207.55	616.546
3208.04	1201.55
3208.53	1447.55
3209.02	843.546
3209.51	1255.55
3209.99	1909.55
3210.48	1405.55
3210.97	864.546
3211.46	781.546
3211.95	808.546
3212.44	542.546
3212.93	1280.55
3213.42	1436.55
3213.9	1609.55
3214.39	1297.55
3214.88	1060.55
3215.37	1434.55
3215.86	2034.55
3216.35	2140.55
3216.84	1234.55
3217.33	882.546
3217.81	1611.55
3218.3	1508.55
3218.79	1321.55
3219.28	915.546
3219.77	1030.55
3220.26	1196.55
3220.75	673.546
3221.24	1146.55
3221.72	2491.55
3222.21	1728.55
3222.7	1254.55
3223.19	1567.55
3223.68	1507.55
3224.17	1180.55
3224.66	1125.55
3225.15	1632.55
3225.63	1711.55
3226.12	1274.55
3226.61	294.546
3227.1	298.546
3227.59	6.5459
3228.08	196.546
3228.57	805.546
3229.06	997.546
3229.54	370.546
3230.03	865.546
3230.52	598.546
3231.01	909.546
3231.5	1579.55
3231.99	1537.55
3232.48	1433.55
3232.97	1895.55
3233.45	1415.55
3233.94	1137.55
3234.43	426.546
3234.92	573.546
3235.41	968.546
3235.9	967.546
3236.39	1599.55
3236.88	1579.55
3237.36	1539.55
3237.85	855.546
3238.34	895.546
3238.83	841.546
3239.32	414.546
3239.81	-94.4541
3240.3	364.546
3240.79	512.546
3241.27	1411.55
3241.76	1391.55
3242.25	1440.55
3242.74	896.546
3243.23	1033.55
3243.72	978.546
3244.21	552.546
3244.7	268.546
3245.18	573.546
3245.67	1678.55
3246.16	2247.55
3246.65	1751.55
3247.14	1361.55
3247.63	1636.55
3248.12	1340.55
3248.61	1217.55
3249.09	1794.55
3249.58	1387.55
3250.07	1041.55
3250.56	1511.55
3251.05	2051.55
3251.54	1639.55
3252.03	1185.55
3252.52	772.546
3253	870.546
3253.49	1667.55
3253.98	1990.55
3254.47	1806.55
3254.96	1794.55
3255.45	1364.55
3255.94	1580.55
3256.43	1554.55
3256.92	1509.55
3257.4	826.546
3257.89	711.546
3258.38	1091.55
3258.87	1652.55
3259.36	2436.55
3259.85	2574.55
3260.34	1960.55
3260.82	1976.55
3261.31	2347.55
3261.8	2345.55
3262.29	2465.55
3262.78	1388.55
3263.27	351.546
3263.76	824.546
3264.25	924.546
3264.74	1396.55
3265.22	1522.55
3265.71	1066.55
3266.2	1754.55
3266.69	1929.55
3267.18	287.546
3267.67	449.546
3268.16	635.546
3268.65	1234.55
3269.13	1531.55
3269.62	1028.55
3270.11	586.546
3270.6	-129.454
3271.09	102.546
3271.58	544.546
3272.07	1236.55
3272.56	1062.55
3273.04	683.546
3273.53	811.546
3274.02	820.546
3274.51	1068.55
3275	1114.55
3275.49	739.546
3275.98	-170.454
3276.47	370.546
3276.95	1386.55
3277.44	1094.55
3277.93	165.546
3278.42	-454.454
3278.91	-34.4541
3279.4	659.546
3279.89	1175.55
3280.38	1250.55
3280.86	1305.55
3281.35	1361.55
3281.84	1319.55
3282.33	806.546
3282.82	543.546
3283.31	481.546
3283.8	603.546
3284.29	597.546
3284.77	301.546
3285.26	36.5459
3285.75	91.5459
3286.24	459.546
3286.73	617.546
3287.22	803.546
3287.71	1430.55
3288.2	837.546
3288.68	1195.55
3289.17	891.546
3289.66	-1.4541
3290.15	-231.454
3290.64	-991.454
3291.13	-174.454
3291.62	93.5459
3292.11	-365.454
3292.59	482.546
3293.08	878.546
3293.57	1042.55
3294.06	34.5459
3294.55	-225.454
3295.04	-258.454
3295.53	53.5459
3296.02	-311.454
3296.5	-879.454
3296.99	-529.454
3297.48	178.546
3297.97	-351.454
3298.46	-1073.45
3298.95	-451.454
3299.44	402.546
3299.93	-349.454
3300.41	-99.4541
3300.9	199.546
3301.39	320.546
3301.88	-481.454
3302.37	-177.454
3302.86	-12.4541
3303.35	-77.4541
3303.84	-123.454
3304.32	195.546
3304.81	208.546
3305.3	482.546
3305.79	666.546
3306.28	-160.454
3306.77	-290.454
3307.26	580.546
3307.75	781.546
3308.23	414.546
3308.72	190.546
3309.21	-584.454
3309.7	-584.454
3310.19	-72.4541
3310.68	223.546
3311.17	491.546
3311.66	476.546
3312.14	-55.4541
3312.63	-411.454
3313.12	12.5459
3313.61	-630.454
3314.1	-537.454
3314.59	-975.454
3315.08	-344.454
3315.57	210.546
3316.05	253.546
3316.54	286.546
3317.03	493.546
3317.52	387.546
3318.01	91.5459
3318.5	-739.454
3318.99	-744.454
3319.48	-451.454
3319.96	-813.454
3320.45	-464.454
3320.94	-92.4541
3321.43	-207.454
3321.92	-801.454
3322.41	-715.454
3322.9	-343.454
3323.39	-797.454
3323.87	-786.454
3324.36	-380.454
3324.85	-161.454
3325.34	-41.4541
3325.83	-341.454
3326.32	606.546
3326.81	220.546
3327.3	-749.454
3327.78	-96.4541
3328.27	410.546
3328.76	365.546
3329.25	411.546
3329.74	165.546
3330.23	-212.454
3330.72	-170.454
3331.21	-243.454
3331.7	218.546
3332.18	504.546
3332.67	1249.55
3333.16	1350.55
3333.65	523.546
3334.14	823.546
3334.63	1464.55
3335.12	943.546
3335.6	437.546
3336.09	181.546
3336.58	95.5459
3337.07	487.546
3337.56	84.5459
3338.05	107.546
3338.54	388.546
3339.03	462.546
3339.52	12.5459
3340	744.546
3340.49	602.546
3340.98	152.546
3341.47	135.546
3341.96	120.546
3342.45	103.546
3342.94	-47.4541
3343.43	-127.454
3343.91	421.546
3344.4	1041.55
3344.89	789.546
3345.38	748.546
3345.87	275.546
3346.36	487.546
3346.85	360.546
3347.34	524.546
3347.82	366.546
3348.31	596.546
3348.8	876.546
3349.29	1037.55
3349.78	747.546
3350.27	493.546
3350.76	747.546
3351.25	878.546
3351.73	487.546
3352.22	725.546
3352.71	1477.55
3353.2	1646.55
3353.69	884.546
3354.18	834.546
3354.67	1662.55
3355.16	1501.55
3355.64	1561.55
3356.13	1411.55
3356.62	919.546
3357.11	1088.55
3357.6	882.546
3358.09	688.546
3358.58	764.546
3359.07	125.546
3359.55	-672.454
3360.04	-790.454
3360.53	-298.454
3361.02	352.546
3361.51	184.546
3362	11.5459
3362.49	-973.454
3362.98	-1223.45
3363.46	-1718.45
3363.95	-1670.45
3364.44	-488.454
3364.93	-1133.45
3365.42	-1751.45
3365.91	-2265.45
3366.4	-2676.45
3366.89	-3222.45
3367.37	-2895.45
3367.86	-2694.45
3368.35	-2464.45
3368.84	-2257.45
3369.33	-2339.45
3369.82	-2230.45
3370.31	-1769.45
3370.8	-1471.45
3371.28	-1278.45
3371.77	-922.454
3372.26	-1403.45
3372.75	-725.454
3373.24	-627.454
3373.73	-1583.45
3374.22	-876.454
3374.71	-617.454
3375.19	-1592.45
3375.68	-1749.45
3376.17	-1815.45
3376.66	-712.454
3377.15	-935.454
3377.64	-1207.45
3378.13	-944.454
3378.62	-644.454
3379.1	-876.454
3379.59	-1386.45
3380.08	-901.454
3380.57	-543.454
3381.06	-299.454
3381.55	-624.454
3382.04	-1107.45
3382.53	-889.454
3383.01	-780.454
3383.5	-769.454
3383.99	-536.454
3384.48	-613.454
3384.97	-345.454
3385.46	-1188.45
3385.95	-1398.45
3386.44	-769.454
3386.92	-957.454
3387.41	-1270.45
3387.9	-1537.45
3388.39	-928.454
3388.88	62.5459
3389.37	-242.454
3389.86	-631.454
3390.35	-804.454
3390.83	-882.454
3391.32	-285.454
3391.81	-386.454
3392.3	-1066.45
3392.79	-1510.45
3393.28	-1384.45
3393.77	-830.454
3394.26	421.546
3394.74	650.546
3395.23	309.546
3395.72	145.546
3396.21	578.546
3396.7	175.546
3397.19	-76.4541
3397.68	-1261.45
3398.17	-902.454
3398.66	-397.454
3399.14	220.546
3399.63	867.546
3400.12	852.546
3400.61	98.5459
3401.1	-684.454
3401.59	-518.454
3402.08	7.5459
3402.56	90.5459
3403.05	-963.454
3403.54	-973.454
3404.03	-673.454
3404.52	-607.454
3405.01	-987.454
3405.5	-897.454
3405.99	-617.454
3406.48	-1564.45
3406.96	-958.454
3407.45	-801.454
3407.94	-929.454
3408.43	-1059.45
3408.92	-1251.45
3409.41	-949.454
3409.9	-916.454
3410.39	-1267.45
3410.87	-1191.45
3411.36	-1485.45
3411.85	-1437.45
3412.34	-297.454
3412.83	-485.454
3413.32	-397.454
3413.81	-824.454
3414.3	-873.454
3414.78	-875.454
3415.27	-614.454
3415.76	327.546
3416.25	19.5459
3416.74	-21.4541
3417.23	552.546
3417.72	391.546
3418.21	-612.454
3418.69	-73.4541
3419.18	480.546
3419.67	846.546
3420.16	900.546
3420.65	-191.454
3421.14	-966.454
3421.63	-625.454
3422.12	-20.4541
3422.6	-75.4541
3423.09	-501.454
3423.58	-406.454
3424.07	261.546
3424.56	585.546
3425.05	658.546
3425.54	355.546
3426.03	113.546
3426.51	401.546
3427	25.5459
3427.49	-280.454
3427.98	-86.4541
3428.47	-194.454
3428.96	-256.454
3429.45	247.546
3429.94	578.546
3430.42	1012.55
3430.91	749.546
3431.4	-100.454
3431.89	-182.454
3432.38	18.5459
3432.87	244.546
3433.36	403.546
3433.85	-715.454
3434.33	-1133.45
3434.82	-538.454
3435.31	-396.454
3435.8	-580.454
3436.29	-529.454
3436.78	-295.454
3437.27	318.546
3437.76	529.546
3438.24	1144.55
3438.73	1610.55
3439.22	449.546
3439.71	-249.454
3440.2	-146.454
3440.69	365.546
3441.18	719.546
3441.67	339.546
3442.15	-357.454
3442.64	-356.454
3443.13	5.5459
3443.62	298.546
3444.11	436.546
3444.6	272.546
3445.09	63.5459
3445.58	-285.454
3446.06	92.5459
3446.55	549.546
3447.04	488.546
3447.53	19.5459
3448.02	-46.4541
3448.51	196.546
3449	384.546
3449.49	52.5459
3449.97	787.546
3450.46	699.546
3450.95	-193.454
3451.44	-209.454
3451.93	887.546
3452.42	886.546
3452.91	548.546
3453.4	-119.454
3453.88	-232.454
3454.37	14.5459
3454.86	-32.4541
3455.35	-177.454
3455.84	-642.454
3456.33	-331.454
3456.82	-388.454
3457.31	134.546
3457.79	76.5459
3458.28	720.546
3458.77	787.546
3459.26	137.546
3459.75	-287.454
3460.24	-107.454
3460.73	217.546
3461.22	-544.454
3461.7	-631.454
3462.19	-483.454
3462.68	94.5459
3463.17	-166.454
3463.66	276.546
3464.15	-102.454
3464.64	23.5459
3465.13	401.546
3465.61	-172.454
3466.1	-627.454
3466.59	-710.454
3467.08	-479.454
3467.57	-487.454
3468.06	-145.454
3468.55	-181.454
3469.04	-71.4541
3469.52	-48.4541
3470.01	171.546
3470.5	155.546
3470.99	-431.454
3471.48	-222.454
3471.97	-627.454
3472.46	-315.454
3472.95	-325.454
3473.44	-246.454
3473.92	-802.454
3474.41	-520.454
3474.9	-1066.45
3475.39	-769.454
3475.88	-700.454
3476.37	-135.454
3476.86	1034.55
3477.34	856.546
3477.83	857.546
3478.32	-141.454
3478.81	-198.454
3479.3	-62.4541
3479.79	-91.4541
3480.28	402.546
3480.77	790.546
3481.26	333.546
3481.74	285.546
3482.23	-213.454
3482.72	-203.454
3483.21	-171.454
3483.7	-662.454
3484.19	-933.454
3484.68	24.5459
3485.17	-350.454
3485.65	321.546
3486.14	-93.4541
3486.63	-1244.45
3487.12	-868.454
3487.61	-215.454
3488.1	-290.454
3488.59	-380.454
3489.08	-1405.45
3489.56	-1524.45
3490.05	-568.454
3490.54	-298.454
3491.03	-940.454
3491.52	-982.454
3492.01	-907.454
3492.5	-175.454
3492.99	-238.454
3493.47	341.546
3493.96	704.546
3494.45	-261.454
3494.94	-145.454
3495.43	-131.454
3495.92	-432.454
3496.41	-168.454
3496.9	290.546
3497.38	-623.454
3497.87	-1101.45
3498.36	-975.454
3498.85	-550.454
3499.34	15.5459
3499.83	-706.454
3500.32	-1405.45
3500.81	-1013.45
3501.29	-171.454
3501.78	-767.454
3502.27	-783.454
3502.76	-604.454
3503.25	-182.454
3503.74	257.546
3504.23	-638.454
3504.72	-1209.45
3505.2	-673.454
3505.69	-1037.45
3506.18	-684.454
3506.67	-182.454
3507.16	-103.454
3507.65	-954.454
3508.14	-1130.45
3508.63	-887.454
3509.11	-1789.45
3509.6	-1246.45
3510.09	-309.454
3510.58	-120.454
3511.07	785.546
3511.56	155.546
3512.05	-515.454
3512.54	-161.454
3513.02	-368.454
3513.51	-975.454
3514	-1936.45
3514.49	-1261.45
3514.98	-644.454
3515.47	-681.454
3515.96	-1142.45
3516.45	-1204.45
3516.93	-805.454
3517.42	-1076.45
3517.91	-1095.45
3518.4	-777.454
3518.89	-400.454
3519.38	-1251.45
3519.87	-1838.45
3520.36	-2368.45
3520.84	-2405.45
3521.33	-1261.45
3521.82	-979.454
3522.31	-460.454
3522.8	132.546
3523.29	-814.454
3523.78	-909.454
3524.27	-626.454
3524.75	-203.454
3525.24	-445.454
3525.73	-725.454
3526.22	-1173.45
3526.71	-1176.45
3527.2	-637.454
3527.69	-1012.45
3528.18	-1122.45
3528.66	-1129.45
3529.15	-892.454
3529.64	-336.454
3530.13	-379.454
3530.62	-437.454
3531.11	-331.454
3531.6	-608.454
3532.09	-373.454
3532.57	-285.454
3533.06	-180.454
3533.55	180.546
3534.04	-590.454
3534.53	-829.454
3535.02	-698.454
3535.51	-1363.45
3536	-1244.45
3536.48	-1432.45
3536.97	-1418.45
3537.46	-433.454
3537.95	-120.454
3538.44	599.546
3538.93	471.546
3539.42	-587.454
3539.91	-722.454
3540.4	-754.454
3540.88	-572.454
3541.37	39.5459
3541.86	-385.454
3542.35	-1207.45
3542.84	-888.454
3543.33	-377.454
3543.82	-957.454
3544.3	-756.454
3544.79	-303.454
3545.28	-557.454
3545.77	-1098.45
3546.26	-1093.45
3546.75	-883.454
3547.24	264.546
3547.73	672.546
3548.22	-173.454
3548.7	-990.454
3549.19	-547.454
3549.68	-272.454
3550.17	-540.454
3550.66	-391.454
3551.15	-101.454
3551.64	157.546
3552.13	420.546
3552.61	541.546
3553.1	943.546
3553.59	-120.454
3554.08	-847.454
3554.57	-981.454
3555.06	255.546
3555.55	55.5459
3556.04	-196.454
3556.52	533.546
3557.01	779.546
3557.5	526.546
3557.99	91.5459
3558.48	-71.4541
3558.97	-371.454
3559.46	-711.454
3559.95	-717.454
3560.43	-707.454
3560.92	-161.454
3561.41	-321.454
3561.9	-24.4541
3562.39	115.546
3562.88	-183.454
3563.37	713.546
3563.86	1153.55
3564.34	815.546
3564.83	-192.454
3565.32	204.546
3565.81	270.546
3566.3	-66.4541
3566.79	-103.454
3567.28	-1212.45
3567.77	-397.454
3568.25	518.546
3568.74	-85.4541
3569.23	-204.454
3569.72	-175.454
3570.21	-112.454
3570.7	-11.4541
3571.19	-143.454
3571.68	-114.454
3572.16	-111.454
3572.65	-1072.45
3573.14	-822.454
3573.63	-519.454
3574.12	-273.454
3574.61	135.546
3575.1	-496.454
3575.59	-1121.45
3576.07	-1225.45
3576.56	-1762.45
3577.05	-450.454
3577.54	0.545898
3578.03	-41.4541
3578.52	-26.4541
3579.01	234.546
3579.5	90.5459
3579.98	516.546
3580.47	1110.55
3580.96	640.546
3581.45	256.546
3581.94	275.546
3582.43	-177.454
3582.92	-91.4541
3583.41	-33.4541
3583.89	-641.454
3584.38	344.546
3584.87	42.5459
3585.36	557.546
3585.85	1186.55
3586.34	672.546
3586.83	665.546
3587.32	255.546
3587.8	-340.454
3588.29	-333.454
3588.78	310.546
3589.27	17.5459
3589.76	-69.4541
3590.25	-251.454
3590.74	-283.454
3591.23	-792.454
3591.71	-137.454
3592.2	-228.454
3592.69	515.546
3593.18	195.546
3593.67	199.546
3594.16	52.5459
3594.65	136.546
3595.14	-222.454
3595.62	78.5459
3596.11	460.546
3596.6	531.546
3597.09	-200.454
3597.58	-663.454
3598.07	-663.454
3598.56	-394.454
3599.05	-851.454
3599.53	-1138.45
3600.02	-1262.45
3600.51	-764.454
3601	-834.454
3601.49	-1331.45
3601.98	-665.454
3602.47	-1153.45
3602.96	-1242.45
3603.44	-1065.45
3603.93	-678.454
3604.42	-467.454
3604.91	-306.454
3605.4	-943.454
3605.89	-710.454
3606.38	-796.454
3606.87	-188.454
3607.35	161.546
3607.84	-1005.45
3608.33	-1503.45
3608.82	-622.454
3609.31	-162.454
3609.8	-583.454
3610.29	-1416.45
3610.78	-1120.45
3611.26	-818.454
3611.75	-218.454
3612.24	-621.454
3612.73	-106.454
3613.22	-757.454
3613.71	-1410.45
3614.2	-483.454
3614.69	14.5459
3615.18	701.546
3615.66	125.546
3616.15	204.546
3616.64	-1056.45
3617.13	-1279.45
3617.62	-1027.45
3618.11	-451.454
3618.6	-1219.45
3619.08	-1145.45
3619.57	-575.454
3620.06	-626.454
3620.55	-275.454
3621.04	-634.454
3621.53	-597.454
3622.02	-632.454
3622.51	-1109.45
3623	-924.454
3623.48	-983.454
3623.97	-1093.45
3624.46	-30.4541
3624.95	68.5459
3625.44	-333.454
3625.93	-589.454
3626.42	-366.454
3626.91	-335.454
3627.39	-464.454
3627.88	-676.454
3628.37	-917.454
3628.86	-721.454
3629.35	-688.454
3629.84	-557.454
3630.33	-654.454
3630.82	-811.454
3631.3	-106.454
3631.79	-489.454
3632.28	52.5459
3632.77	97.5459
3633.26	198.546
3633.75	13.5459
3634.24	-404.454
3634.73	-391.454
3635.21	-77.4541
3635.7	353.546
3636.19	330.546
3636.68	334.546
3637.17	482.546
3637.66	-184.454
3638.15	181.546
3638.64	104.546
3639.12	-852.454
3639.61	-1071.45
3640.1	-1108.45
3640.59	-1818.45
3641.08	-1676.45
3641.57	-798.454
3642.06	-67.4541
3642.55	-133.454
3643.03	-300.454
3643.52	-404.454
3644.01	-298.454
3644.5	-996.454
3644.99	-155.454
3645.48	105.546
3645.97	-1242.45
3646.46	-1767.45
3646.94	-796.454
3647.43	-877.454
3647.92	-1664.45
3648.41	-1854.45
3648.9	-734.454
3649.39	269.546
3649.88	342.546
3650.37	-131.454
3650.85	98.5459
3651.34	-264.454
3651.83	-509.454
3652.32	-327.454
3652.81	-47.4541
3653.3	-216.454
3653.79	35.5459
3654.28	133.546
3654.76	-148.454
3655.25	-823.454
3655.74	-513.454
3656.23	-27.4541
3656.72	161.546
3657.21	95.5459
3657.7	652.546
3658.19	76.5459
3658.67	-414.454
3659.16	-335.454
3659.65	35.5459
3660.14	-310.454
3660.63	-10.4541
3661.12	-382.454
3661.61	-463.454
3662.1	-72.4541
3662.58	-322.454
3663.07	-796.454
3663.56	-618.454
3664.05	-209.454
3664.54	-227.454
3665.03	-980.454
3665.52	-1268.45
3666.01	-686.454
3666.49	449.546
3666.98	-338.454
3667.47	-295.454
3667.96	-356.454
3668.45	-744.454
3668.94	-428.454
3669.43	-136.454
3669.92	-220.454
3670.4	-336.454
3670.89	-40.4541
3671.38	169.546
3671.87	-314.454
3672.36	-620.454
3672.85	-395.454
3673.34	316.546
3673.83	-98.4541
3674.31	-356.454
3674.8	-53.4541
3675.29	-280.454
3675.78	-1085.45
3676.27	-857.454
3676.76	-715.454
3677.25	-956.454
3677.74	-799.454
3678.22	-621.454
3678.71	-797.454
3679.2	-570.454
3679.69	-725.454
3680.18	-829.454
3680.67	254.546
3681.16	1346.55
3681.65	808.546
3682.14	306.546
3682.62	-78.4541
3683.11	-717.454
3683.6	-719.454
3684.09	-880.454
3684.58	-1885.45
3685.07	-1169.45
3685.56	-641.454
3686.04	-490.454
3686.53	-493.454
3687.02	-366.454
3687.51	-1134.45
3688	-1354.45

## Sheet: Sheet2
X [G]	Intensity			DspeG+pDAK1
3188	3644.2
3188.49	9119.2
3188.98	12294.2
3189.47	15354.2
3189.96	16657.2
3190.44	16894.2
3190.93	14544.2
3191.42	15676.2
3191.91	13856.2
3192.4	13357.2
3192.89	14971.2
3193.38	15697.2
3193.86	15792.2
3194.35	15512.2
3194.84	16507.2
3195.33	14060.2
3195.82	6483.2
3196.31	2125.2
3196.8	-93.8047
3197.29	1647.2
3197.78	4743.2
3198.26	10184.2
3198.75	12833.2
3199.24	9382.2
3199.73	8427.2
3200.22	10961.2
3200.71	8143.2
3201.2	8638.2
3201.69	9625.2
3202.17	6999.2
3202.66	8079.2
3203.15	8148.2
3203.64	5210.2
3204.13	7325.2
3204.62	8495.2
3205.11	8615.2
3205.6	12159.2
3206.08	11004.2
3206.57	9735.2
3207.06	9315.2
3207.55	7528.2
3208.04	7812.2
3208.53	8210.2
3209.02	5882.2
3209.51	4734.2
3209.99	6828.2
3210.48	9252.2
3210.97	9486.2
3211.46	8496.2
3211.95	7752.2
3212.44	7571.2
3212.93	6750.2
3213.42	9966.2
3213.9	7307.2
3214.39	5997.2
3214.88	4230.2
3215.37	3553.2
3215.86	4115.2
3216.35	7195.2
3216.84	7152.2
3217.33	6802.2
3217.81	6784.2
3218.3	7093.2
3218.79	4284.2
3219.28	2774.2
3219.77	5443.2
3220.26	5742.2
3220.75	6982.2
3221.24	4006.2
3221.72	6905.2
3222.21	4247.2
3222.7	2250.2
3223.19	590.195
3223.68	2516.2
3224.17	-450.805
3224.66	-1229.8
3225.15	113.195
3225.63	-336.805
3226.12	-2379.8
3226.61	-530.805
3227.1	-25.8047
3227.59	-975.805
3228.08	-3100.8
3228.57	-1202.8
3229.06	820.195
3229.54	-1603.8
3230.03	-1460.8
3230.52	-1223.8
3231.01	435.195
3231.5	-1482.8
3231.99	675.195
3232.48	1687.2
3232.97	4791.2
3233.45	6194.2
3233.94	3584.2
3234.43	2835.2
3234.92	4585.2
3235.41	6477.2
3235.9	5670.2
3236.39	4661.2
3236.88	4224.2
3237.36	5131.2
3237.85	5276.2
3238.34	7347.2
3238.83	9620.2
3239.32	9665.2
3239.81	9075.2
3240.3	9315.2
3240.79	9222.2
3241.27	7315.2
3241.76	7538.2
3242.25	9615.2
3242.74	10372.2
3243.23	8287.2
3243.72	9634.2
3244.21	7786.2
3244.7	9690.2
3245.18	10822.2
3245.67	11871.2
3246.16	10142.2
3246.65	10449.2
3247.14	11628.2
3247.63	12822.2
3248.12	8523.2
3248.61	12452.2
3249.09	12504.2
3249.58	14647.2
3250.07	13063.2
3250.56	11490.2
3251.05	9885.2
3251.54	10056.2
3252.03	9972.2
3252.52	8475.2
3253	9307.2
3253.49	10073.2
3253.98	9875.2
3254.47	8798.2
3254.96	7667.2
3255.45	9981.2
3255.94	11382.2
3256.43	13116.2
3256.92	12168.2
3257.4	9549.2
3257.89	6876.2
3258.38	7205.2
3258.87	6608.2
3259.36	9673.2
3259.85	10982.2
3260.34	10324.2
3260.82	8667.2
3261.31	6105.2
3261.8	7341.2
3262.29	8261.2
3262.78	5226.2
3263.27	4035.2
3263.76	4580.2
3264.25	5091.2
3264.74	3084.2
3265.22	3137.2
3265.71	4008.2
3266.2	4892.2
3266.69	6420.2
3267.18	4052.2
3267.67	3896.2
3268.16	2580.2
3268.65	1781.2
3269.13	3310.2
3269.62	4461.2
3270.11	4240.2
3270.6	3573.2
3271.09	3556.2
3271.58	5147.2
3272.07	5612.2
3272.56	6437.2
3273.04	5955.2
3273.53	5739.2
3274.02	3924.2
3274.51	5026.2
3275	4083.2
3275.49	2524.2
3275.98	3123.2
3276.47	2901.2
3276.95	2417.2
3277.44	2864.2
3277.93	3615.2
3278.42	3650.2
3278.91	3145.2
3279.4	2991.2
3279.89	3977.2
3280.38	3680.2
3280.86	2466.2
3281.35	1165.2
3281.84	1229.2
3282.33	-574.805
3282.82	-141.805
3283.31	-2628.8
3283.8	-2724.8
3284.29	-1629.8
3284.77	-2349.8
3285.26	-1969.8
3285.75	-4089.8
3286.24	-3215.8
3286.73	-888.805
3287.22	-989.805
3287.71	-2116.8
3288.2	137.195
3288.68	233.195
3289.17	-21.8047
3289.66	-571.805
3290.15	-1942.8
3290.64	-2040.8
3291.13	-922.805
3291.62	1023.2
3292.11	409.195
3292.59	-538.805
3293.08	-2356.8
3293.57	-1387.8
3294.06	-2009.8
3294.55	70.1953
3295.04	1144.2
3295.53	-597.805
3296.02	619.195
3296.5	-1275.8
3296.99	-1684.8
3297.48	-255.805
3297.97	-358.805
3298.46	-3057.8
3298.95	-1340.8
3299.44	460.195
3299.93	836.195
3300.41	1375.2
3300.9	1815.2
3301.39	3411.2
3301.88	3562.2
3302.37	3015.2
3302.86	2007.2
3303.35	3402.2
3303.84	4017.2
3304.32	1634.2
3304.81	2040.2
3305.3	2526.2
3305.79	3290.2
3306.28	4130.2
3306.77	4677.2
3307.26	3206.2
3307.75	3599.2
3308.23	2740.2
3308.72	2112.2
3309.21	1383.2
3309.7	220.195
3310.19	1540.2
3310.68	159.195
3311.17	-3170.8
3311.66	-2179.8
3312.14	-3051.8
3312.63	-1794.8
3313.12	-4456.8
3313.61	-3786.8
3314.1	-3675.8
3314.59	-4052.8
3315.08	-6487.8
3315.57	-5455.8
3316.05	-7275.8
3316.54	-6766.8
3317.03	-5339.8
3317.52	-5933.8
3318.01	-6907.8
3318.5	-6088.8
3318.99	-7746.8
3319.48	-8834.8
3319.96	-6161.8
3320.45	-4739.8
3320.94	-2481.8
3321.43	-1445.8
3321.92	-664.805
3322.41	-140.805
3322.9	1192.2
3323.39	5072.2
3323.87	5412.2
3324.36	6402.2
3324.85	6593.2
3325.34	8505.2
3325.83	11370.2
3326.32	14708.2
3326.81	15361.2
3327.3	20380.2
3327.78	24463.2
3328.27	27334.2
3328.76	28767.2
3329.25	32525.2
3329.74	34151.2
3330.23	38988.2
3330.72	43184.2
3331.21	47384.2
3331.7	48648.2
3332.18	49229.2
3332.67	48665.2
3333.16	49485.2
3333.65	47683.2
3334.14	44860.2
3334.63	45651.2
3335.12	44035.2
3335.6	39486.2
3336.09	35365.2
3336.58	33286.2
3337.07	30349.2
3337.56	27356.2
3338.05	23855.2
3338.54	22621.2
3339.03	19569.2
3339.52	16261.2
3340	13675.2
3340.49	13530.2
3340.98	10576.2
3341.47	9924.2
3341.96	9285.2
3342.45	9003.2
3342.94	7881.2
3343.43	7568.2
3343.91	8667.2
3344.4	9483.2
3344.89	9553.2
3345.38	8696.2
3345.87	9565.2
3346.36	12619.2
3346.85	12986.2
3347.34	13603.2
3347.82	15999.2
3348.31	16815.2
3348.8	18814.2
3349.29	21666.2
3349.78	22598.2
3350.27	24976.2
3350.76	27237.2
3351.25	29941.2
3351.73	31557.2
3352.22	33645.2
3352.71	35900.2
3353.2	40301.2
3353.69	48247.2
3354.18	54442.2
3354.67	60855.2
3355.16	67376.2
3355.64	76762.2
3356.13	84991.2
3356.62	91854.2
3357.11	99166.2
3357.6	102773
3358.09	105672
3358.58	106265
3359.07	102952
3359.55	98499.2
3360.04	89853.2
3360.53	77569.2
3361.02	64274.2
3361.51	50063.2
3362	33460.2
3362.49	18396.2
3362.98	2006.2
3363.46	-16070.8
3363.95	-31269.8
3364.44	-45107.8
3364.93	-59454.8
3365.42	-71707.8
3365.91	-83054.8
3366.4	-91801.8
3366.89	-100204
3367.37	-106991
3367.86	-110321
3368.35	-112164
3368.84	-110582
3369.33	-108618
3369.82	-105170
3370.31	-97454.8
3370.8	-91501.8
3371.28	-84118.8
3371.77	-76830.8
3372.26	-69787.8
3372.75	-65126.8
3373.24	-61268.8
3373.73	-55211.8
3374.22	-50230.8
3374.71	-46453.8
3375.19	-40821.8
3375.68	-35079.8
3376.17	-31449.8
3376.66	-29267.8
3377.15	-27558.8
3377.64	-26109.8
3378.13	-24790.8
3378.62	-21287.8
3379.1	-19604.8
3379.59	-20179.8
3380.08	-17887.8
3380.57	-16634.8
3381.06	-17639.8
3381.55	-16583.8
3382.04	-15608.8
3382.53	-15011.8
3383.01	-13685.8
3383.5	-11464.8
3383.99	-11786.8
3384.48	-14077.8
3384.97	-11683.8
3385.46	-10436.8
3385.95	-9954.8
3386.44	-9219.8
3386.92	-9648.8
3387.41	-9293.8
3387.9	-8847.8
3388.39	-9402.8
3388.88	-9336.8
3389.37	-10155.8
3389.86	-10674.8
3390.35	-8623.8
3390.83	-9447.8
3391.32	-10507.8
3391.81	-9262.8
3392.3	-7279.8
3392.79	-8963.8
3393.28	-10825.8
3393.77	-9659.8
3394.26	-11067.8
3394.74	-10616.8
3395.23	-10163.8
3395.72	-7730.8
3396.21	-7915.8
3396.7	-9495.8
3397.19	-10694.8
3397.68	-13099.8
3398.17	-13993.8
3398.66	-13714.8
3399.14	-13105.8
3399.63	-14932.8
3400.12	-16104.8
3400.61	-15648.8
3401.1	-16435.8
3401.59	-17588.8
3402.08	-19079.8
3402.56	-18766.8
3403.05	-19044.8
3403.54	-20875.8
3404.03	-22793.8
3404.52	-21862.8
3405.01	-21050.8
3405.5	-20307.8
3405.99	-20899.8
3406.48	-21135.8
3406.96	-19122.8
3407.45	-19846.8
3407.94	-19303.8
3408.43	-17656.8
3408.92	-16505.8
3409.41	-17363.8
3409.9	-16188.8
3410.39	-15392.8
3410.87	-14308.8
3411.36	-13513.8
3411.85	-13296.8
3412.34	-11628.8
3412.83	-12490.8
3413.32	-12142.8
3413.81	-10334.8
3414.3	-11640.8
3414.78	-12493.8
3415.27	-11397.8
3415.76	-7983.8
3416.25	-8304.8
3416.74	-7901.8
3417.23	-8007.8
3417.72	-6758.8
3418.21	-7316.8
3418.69	-6355.8
3419.18	-4836.8
3419.67	-5423.8
3420.16	-4294.8
3420.65	-2776.8
3421.14	-433.805
3421.63	263.195
3422.12	-2080.8
3422.6	-3162.8
3423.09	-1987.8
3423.58	-31.8047
3424.07	-608.805
3424.56	-1302.8
3425.05	-2358.8
3425.54	-1017.8
3426.03	1709.2
3426.51	1690.2
3427	1087.2
3427.49	1969.2
3427.98	2753.2
3428.47	2757.2
3428.96	2093.2
3429.45	216.195
3429.94	1347.2
3430.42	2772.2
3430.91	4626.2
3431.4	4795.2
3431.89	2528.2
3432.38	3369.2
3432.87	3044.2
3433.36	1514.2
3433.85	-144.805
3434.33	814.195
3434.82	1848.2
3435.31	2655.2
3435.8	3137.2
3436.29	3302.2
3436.78	1997.2
3437.27	1875.2
3437.76	1638.2
3438.24	1487.2
3438.73	2148.2
3439.22	3035.2
3439.71	4073.2
3440.2	5706.2
3440.69	2786.2
3441.18	1565.2
3441.67	3020.2
3442.15	2935.2
3442.64	2541.2
3443.13	3051.2
3443.62	2109.2
3444.11	2923.2
3444.6	4326.2
3445.09	6033.2
3445.58	5942.2
3446.06	3632.2
3446.55	5002.2
3447.04	4305.2
3447.53	3629.2
3448.02	4630.2
3448.51	3760.2
3449	3043.2
3449.49	2965.2
3449.97	2560.2
3450.46	2043.2
3450.95	1606.2
3451.44	2507.2
3451.93	2082.2
3452.42	1177.2
3452.91	2124.2
3453.4	2182.2
3453.88	2329.2
3454.37	648.195
3454.86	1207.2
3455.35	1120.2
3455.84	-1030.8
3456.33	-2070.8
3456.82	1049.2
3457.31	1721.2
3457.79	1499.2
3458.28	952.195
3458.77	426.195
3459.26	114.195
3459.75	9.19531
3460.24	438.195
3460.73	-93.8047
3461.22	-409.805
3461.7	1283.2
3462.19	1242.2
3462.68	-22.8047
3463.17	-1881.8
3463.66	-517.805
3464.15	1126.2
3464.64	851.195
3465.13	690.195
3465.61	1147.2
3466.1	-888.805
3466.59	-926.805
3467.08	290.195
3467.57	113.195
3468.06	1466.2
3468.55	2295.2
3469.04	864.195
3469.52	-406.805
3470.01	-818.805
3470.5	1044.2
3470.99	-809.805
3471.48	-1615.8
3471.97	536.195
3472.46	866.195
3472.95	1038.2
3473.44	1858.2
3473.92	2815.2
3474.41	2604.2
3474.9	1901.2
3475.39	2364.2
3475.88	-668.805
3476.37	-2870.8
3476.86	-2093.8
3477.34	-1657.8
3477.83	-237.805
3478.32	1238.2
3478.81	1056.2
3479.3	-322.805
3479.79	-1178.8
3480.28	546.195
3480.77	-725.805
3481.26	-2649.8
3481.74	-1271.8
3482.23	-2322.8
3482.72	-2905.8
3483.21	-1985.8
3483.7	-891.805
3484.19	-1366.8
3484.68	-2015.8
3485.17	-2634.8
3485.65	-1613.8
3486.14	-286.805
3486.63	-993.805
3487.12	-1623.8
3487.61	-1567.8
3488.1	178.195
3488.59	2424.2
3489.08	1697.2
3489.56	139.195
3490.05	-244.805
3490.54	25.1953
3491.03	121.195
3491.52	-486.805
3492.01	-101.805
3492.5	1872.2
3492.99	2612.2
3493.47	292.195
3493.96	-1160.8
3494.45	-506.805
3494.94	-352.805
3495.43	383.195
3495.92	-1219.8
3496.41	-1389.8
3496.9	-1230.8
3497.38	-78.8047
3497.87	210.195
3498.36	97.1953
3498.85	-535.805
3499.34	-401.805
3499.83	-2520.8
3500.32	-2643.8
3500.81	-3017.8
3501.29	-3132.8
3501.78	-3432.8
3502.27	-4084.8
3502.76	-5704.8
3503.25	-6188.8
3503.74	-6507.8
3504.23	-6147.8
3504.72	-6181.8
3505.2	-6675.8
3505.69	-7642.8
3506.18	-6856.8
3506.67	-6419.8
3507.16	-7407.8
3507.65	-7887.8
3508.14	-8558.8
3508.63	-9072.8
3509.11	-10147.8
3509.6	-11119.8
3510.09	-11119.8
3510.58	-10276.8
3511.07	-9028.8
3511.56	-8352.8
3512.05	-9927.8
3512.54	-10734.8
3513.02	-10071.8
3513.51	-9879.8
3514	-9434.8
3514.49	-9707.8
3514.98	-9141.8
3515.47	-8273.8
3515.96	-10503.8
3516.45	-10185.8
3516.93	-7586.8
3517.42	-7063.8
3517.91	-7453.8
3518.4	-6729.8
3518.89	-5687.8
3519.38	-4115.8
3519.87	-3495.8
3520.36	-4675.8
3520.84	-6370.8
3521.33	-6740.8
3521.82	-5456.8
3522.31	-2968.8
3522.8	-1608.8
3523.29	-1513.8
3523.78	-1277.8
3524.27	-1884.8
3524.75	-2663.8
3525.24	-3278.8
3525.73	-2731.8
3526.22	-4068.8
3526.71	-4813.8
3527.2	-4034.8
3527.69	-3477.8
3528.18	-935.805
3528.66	-708.805
3529.15	-2739.8
3529.64	-2909.8
3530.13	-1079.8
3530.62	190.195
3531.11	589.195
3531.6	-32.8047
3532.09	-998.805
3532.57	-2296.8
3533.06	-2917.8
3533.55	-1242.8
3534.04	-1110.8
3534.53	580.195
3535.02	-998.805
3535.51	-1007.8
3536	-521.805
3536.48	-0.804688
3536.97	343.195
3537.46	744.195
3537.95	85.1953
3538.44	-777.805
3538.93	-119.805
3539.42	1371.2
3539.91	-35.8047
3540.4	-1871.8
3540.88	-1482.8
3541.37	-22.8047
3541.86	757.195
3542.35	-79.8047
3542.84	-370.805
3543.33	67.1953
3543.82	-707.805
3544.3	-2424.8
3544.79	-701.805
3545.28	-487.805
3545.77	-924.805
3546.26	-1334.8
3546.75	-448.805
3547.24	110.195
3547.73	819.195
3548.22	1202.2
3548.7	574.195
3549.19	-856.805
3549.68	578.195
3550.17	2386.2
3550.66	571.195
3551.15	2123.2
3551.64	2675.2
3552.13	1535.2
3552.61	756.195
3553.1	-312.805
3553.59	778.195
3554.08	1511.2
3554.57	-13.8047
3555.06	-1342.8
3555.55	-1060.8
3556.04	-1367.8
3556.52	-184.805
3557.01	-235.805
3557.5	-853.805
3557.99	-961.805
3558.48	-198.805
3558.97	-1603.8
3559.46	-1457.8
3559.95	-438.805
3560.43	-1351.8
3560.92	-1074.8
3561.41	-63.8047
3561.9	701.195
3562.39	406.195
3562.88	826.195
3563.37	-367.805
3563.86	-241.805
3564.34	412.195
3564.83	-579.805
3565.32	1766.2
3565.81	2475.2
3566.3	2512.2
3566.79	916.195
3567.28	2461.2
3567.77	1854.2
3568.25	991.195
3568.74	14.1953
3569.23	-929.805
3569.72	-1628.8
3570.21	-895.805
3570.7	-2024.8
3571.19	-1716.8
3571.68	-1320.8
3572.16	-1289.8
3572.65	-3.80469
3573.14	1363.2
3573.63	914.195
3574.12	-203.805
3574.61	-768.805
3575.1	1509.2
3575.59	1442.2
3576.07	2013.2
3576.56	1691.2
3577.05	192.195
3577.54	40.1953
3578.03	1851.2
3578.52	2598.2
3579.01	49.1953
3579.5	35.1953
3579.98	714.195
3580.47	3.19531
3580.96	724.195
3581.45	665.195
3581.94	551.195
3582.43	42.1953
3582.92	-128.805
3583.41	451.195
3583.89	1489.2
3584.38	1251.2
3584.87	2104.2
3585.36	3726.2
3585.85	2755.2
3586.34	3769.2
3586.83	2226.2
3587.32	1875.2
3587.8	3936.2
3588.29	3888.2
3588.78	2271.2
3589.27	1549.2
3589.76	1574.2
3590.25	842.195
3590.74	351.195
3591.23	35.1953
3591.71	116.195
3592.2	21.1953
3592.69	-8.80469
3593.18	148.195
3593.67	2450.2
3594.16	1777.2
3594.65	124.195
3595.14	2011.2
3595.62	3044.2
3596.11	1602.2
3596.6	1506.2
3597.09	1269.2
3597.58	952.195
3598.07	-309.805
3598.56	-434.805
3599.05	-1452.8
3599.53	-2227.8
3600.02	-1983.8
3600.51	-1836.8
3601	195.195
3601.49	-528.805
3601.98	-3217.8
3602.47	-2650.8
3602.96	-3571.8
3603.44	-5247.8
3603.93	-7574.8
3604.42	-5636.8
3604.91	-5630.8
3605.4	-6981.8
3605.89	-7449.8
3606.38	-8218.8
3606.87	-7149.8
3607.35	-7053.8
3607.84	-6778.8
3608.33	-6883.8
3608.82	-4492.8
3609.31	-4179.8
3609.8	-6177.8
3610.29	-6714.8
3610.78	-6217.8
3611.26	-4541.8
3611.75	-4827.8
3612.24	-5781.8
3612.73	-5257.8
3613.22	-3430.8
3613.71	-4125.8
3614.2	-7128.8
3614.69	-6783.8
3615.18	-4118.8
3615.66	-3787.8
3616.15	-4190.8
3616.64	-5377.8
3617.13	-6343.8
3617.62	-6692.8
3618.11	-6009.8
3618.6	-5673.8
3619.08	-6401.8
3619.57	-5686.8
3620.06	-5706.8
3620.55	-6978.8
3621.04	-5825.8
3621.53	-6116.8
3622.02	-6179.8
3622.51	-6969.8
3623	-6137.8
3623.48	-6669.8
3623.97	-5225.8
3624.46	-4844.8
3624.95	-7016.8
3625.44	-5830.8
3625.93	-5940.8
3626.42	-7814.8
3626.91	-8201.8
3627.39	-7197.8
3627.88	-6872.8
3628.37	-7673.8
3628.86	-7309.8
3629.35	-7230.8
3629.84	-5168.8
3630.33	-4804.8
3630.82	-7413.8
3631.3	-7456.8
3631.79	-4490.8
3632.28	-4836.8
3632.77	-6757.8
3633.26	-8153.8
3633.75	-5463.8
3634.24	-4631.8
3634.73	-5471.8
3635.21	-4060.8
3635.7	-4253.8
3636.19	-5342.8
3636.68	-6494.8
3637.17	-6670.8
3637.66	-6235.8
3638.15	-3673.8
3638.64	-3305.8
3639.12	-4529.8
3639.61	-4383.8
3640.1	-3450.8
3640.59	-2567.8
3641.08	-2641.8
3641.57	-2218.8
3642.06	-1944.8
3642.55	-4006.8
3643.03	-6092.8
3643.52	-4074.8
3644.01	-2703.8
3644.5	-2196.8
3644.99	-2108.8
3645.48	-3639.8
3645.97	-4066.8
3646.46	-5250.8
3646.94	-3483.8
3647.43	-3262.8
3647.92	-4549.8
3648.41	-4636.8
3648.9	-3875.8
3649.39	-2329.8
3649.88	-2904.8
3650.37	-2941.8
3650.85	-5246.8
3651.34	-5156.8
3651.83	-5740.8
3652.32	-5490.8
3652.81	-5223.8
3653.3	-3276.8
3653.79	-3222.8
3654.28	-3729.8
3654.76	-5438.8
3655.25	-6507.8
3655.74	-5617.8
3656.23	-5111.8
3656.72	-5176.8
3657.21	-4111.8
3657.7	-4317.8
3658.19	-5192.8
3658.67	-4270.8
3659.16	-3779.8
3659.65	-3296.8
3660.14	-2301.8
3660.63	-2451.8
3661.12	-3591.8
3661.61	-3763.8
3662.1	-2612.8
3662.58	-3190.8
3663.07	-2766.8
3663.56	-3220.8
3664.05	-1977.8
3664.54	-2044.8
3665.03	-2545.8
3665.52	-2348.8
3666.01	-4094.8
3666.49	-3600.8
3666.98	-3265.8
3667.47	-3648.8
3667.96	-3031.8
3668.45	-2785.8
3668.94	-915.805
3669.43	-132.805
3669.92	595.195
3670.4	289.195
3670.89	266.195
3671.38	-91.8047
3671.87	-2419.8
3672.36	-2287.8
3672.85	-1924.8
3673.34	-2715.8
3673.83	-2356.8
3674.31	-2395.8
3674.8	-4074.8
3675.29	-4572.8
3675.78	-1887.8
3676.27	-2078.8
3676.76	-1295.8
3677.25	-1847.8
3677.74	-2683.8
3678.22	-1716.8
3678.71	-1879.8
3679.2	-768.805
3679.69	-2370.8
3680.18	-3069.8
3680.67	-1621.8
3681.16	-2299.8
3681.65	-2243.8
3682.14	-2244.8
3682.62	-396.805
3683.11	-471.805
3683.6	-282.805
3684.09	355.195
3684.58	-1656.8
3685.07	-726.805
3685.56	-1148.8
3686.04	-2191.8
3686.53	-2793.8
3687.02	-2702.8
3687.51	-678.805
3688	-168.805

## Sheet: Sheet3
X [G]	Intensity			DspeG_pDAK1_DMTU-UA
3188	4270.51
3188.49	6324.51
3188.98	4741.51
3189.47	6174.51
3189.96	4030.51
3190.44	2792.51
3190.93	5456.51
3191.42	8027.51
3191.91	8102.51
3192.4	7342.51
3192.89	7408.51
3193.38	7661.51
3193.86	6639.51
3194.35	6280.51
3194.84	5003.51
3195.33	5326.51
3195.82	6788.51
3196.31	7406.51
3196.8	5781.51
3197.29	4770.51
3197.78	6696.51
3198.26	7161.51
3198.75	6562.51
3199.24	5771.51
3199.73	4024.51
3200.22	5418.51
3200.71	4766.51
3201.2	2438.51
3201.69	3431.51
3202.17	5259.51
3202.66	7018.51
3203.15	7261.51
3203.64	6062.51
3204.13	5955.51
3204.62	6014.51
3205.11	6665.51
3205.6	4816.51
3206.08	4257.51
3206.57	5458.51
3207.06	3296.51
3207.55	3132.51
3208.04	3712.51
3208.53	2939.51
3209.02	1945.51
3209.51	1056.51
3209.99	670.515
3210.48	-3.48535
3210.97	1634.51
3211.46	1735.51
3211.95	1003.51
3212.44	564.515
3212.93	370.515
3213.42	119.515
3213.9	-754.485
3214.39	-2181.49
3214.88	-1111.49
3215.37	-432.485
3215.86	607.515
3216.35	-384.485
3216.84	-581.485
3217.33	-938.485
3217.81	548.515
3218.3	-659.485
3218.79	-2417.49
3219.28	347.515
3219.77	1339.51
3220.26	-121.485
3220.75	-1614.49
3221.24	869.515
3221.72	3509.51
3222.21	3644.51
3222.7	3550.51
3223.19	1815.51
3223.68	2624.51
3224.17	537.515
3224.66	108.515
3225.15	548.515
3225.63	2895.51
3226.12	4142.51
3226.61	3519.51
3227.1	3277.51
3227.59	3356.51
3228.08	2737.51
3228.57	3011.51
3229.06	2249.51
3229.54	4136.51
3230.03	6244.51
3230.52	5181.51
3231.01	3790.51
3231.5	5130.51
3231.99	4862.51
3232.48	3823.51
3232.97	4391.51
3233.45	3796.51
3233.94	5434.51
3234.43	7197.51
3234.92	6943.51
3235.41	3962.51
3235.9	3005.51
3236.39	3230.51
3236.88	4151.51
3237.36	2711.51
3237.85	1022.51
3238.34	468.515
3238.83	3742.51
3239.32	5151.51
3239.81	4189.51
3240.3	4398.51
3240.79	4617.51
3241.27	5082.51
3241.76	5781.51
3242.25	4823.51
3242.74	3122.51
3243.23	2707.51
3243.72	4280.51
3244.21	5378.51
3244.7	4374.51
3245.18	4117.51
3245.67	4159.51
3246.16	4303.51
3246.65	5347.51
3247.14	7066.51
3247.63	7309.51
3248.12	7334.51
3248.61	7579.51
3249.09	7373.51
3249.58	6255.51
3250.07	6111.51
3250.56	6525.51
3251.05	4447.51
3251.54	5195.51
3252.03	5453.51
3252.52	6199.51
3253	9689.51
3253.49	9528.51
3253.98	7693.51
3254.47	7709.51
3254.96	7521.51
3255.45	7771.51
3255.94	7447.51
3256.43	7616.51
3256.92	8456.51
3257.4	7142.51
3257.89	4960.51
3258.38	4851.51
3258.87	6857.51
3259.36	7547.51
3259.85	8748.51
3260.34	8672.51
3260.82	7156.51
3261.31	6516.51
3261.8	5349.51
3262.29	5595.51
3262.78	4399.51
3263.27	2518.51
3263.76	3447.51
3264.25	4743.51
3264.74	5247.51
3265.22	6152.51
3265.71	6401.51
3266.2	4528.51
3266.69	2745.51
3267.18	4916.51
3267.67	8597.51
3268.16	8757.51
3268.65	5810.51
3269.13	4537.51
3269.62	4048.51
3270.11	4353.51
3270.6	4016.51
3271.09	3705.51
3271.58	4931.51
3272.07	7118.51
3272.56	6840.51
3273.04	5154.51
3273.53	4097.51
3274.02	5967.51
3274.51	5109.51
3275	3095.51
3275.49	1390.51
3275.98	1525.51
3276.47	2876.51
3276.95	5181.51
3277.44	4162.51
3277.93	2099.51
3278.42	2794.51
3278.91	1849.51
3279.4	347.515
3279.89	189.515
3280.38	998.515
3280.86	1708.51
3281.35	518.515
3281.84	296.515
3282.33	232.515
3282.82	964.515
3283.31	766.515
3283.8	240.515
3284.29	-856.485
3284.77	-1368.49
3285.26	-956.485
3285.75	-506.485
3286.24	1047.51
3286.73	2209.51
3287.22	1472.51
3287.71	907.515
3288.2	124.515
3288.68	1155.51
3289.17	-219.485
3289.66	505.515
3290.15	1925.51
3290.64	4035.51
3291.13	3782.51
3291.62	2479.51
3292.11	1752.51
3292.59	2675.51
3293.08	2061.51
3293.57	2759.51
3294.06	4919.51
3294.55	2791.51
3295.04	2231.51
3295.53	2583.51
3296.02	3283.51
3296.5	2671.51
3296.99	3175.51
3297.48	4668.51
3297.97	3780.51
3298.46	1771.51
3298.95	-496.485
3299.44	-2583.49
3299.93	-1978.49
3300.41	1237.51
3300.9	600.515
3301.39	534.515
3301.88	-306.485
3302.37	-71.4854
3302.86	-166.485
3303.35	-1134.49
3303.84	-805.485
3304.32	-1934.49
3304.81	-1106.49
3305.3	26.5146
3305.79	1047.51
3306.28	161.515
3306.77	-1252.49
3307.26	499.515
3307.75	-1166.49
3308.23	-1499.49
3308.72	-2353.49
3309.21	-4081.49
3309.7	-2525.49
3310.19	-2132.49
3310.68	167.515
3311.17	-484.485
3311.66	-2060.49
3312.14	-1752.49
3312.63	-3093.49
3313.12	-2597.49
3313.61	-249.485
3314.1	-1171.49
3314.59	-2214.49
3315.08	-3312.49
3315.57	-4373.49
3316.05	-3324.49
3316.54	-2573.49
3317.03	-2471.49
3317.52	-1819.49
3318.01	-2252.49
3318.5	-114.485
3318.99	-358.485
3319.48	-616.485
3319.96	358.515
3320.45	438.515
3320.94	848.515
3321.43	98.5146
3321.92	813.515
3322.41	2453.51
3322.9	3599.51
3323.39	3541.51
3323.87	3158.51
3324.36	1779.51
3324.85	3299.51
3325.34	6683.51
3325.83	8280.51
3326.32	6930.51
3326.81	5686.51
3327.3	5444.51
3327.78	8149.51
3328.27	10651.5
3328.76	10115.5
3329.25	9475.51
3329.74	11172.5
3330.23	12890.5
3330.72	14242.5
3331.21	13042.5
3331.7	12539.5
3332.18	13838.5
3332.67	14449.5
3333.16	10720.5
3333.65	11175.5
3334.14	12804.5
3334.63	11804.5
3335.12	10836.5
3335.6	9615.51
3336.09	7787.51
3336.58	9770.51
3337.07	9866.51
3337.56	7373.51
3338.05	8207.51
3338.54	8146.51
3339.03	6890.51
3339.52	7392.51
3340	8558.51
3340.49	9400.51
3340.98	8184.51
3341.47	5491.51
3341.96	5825.51
3342.45	5564.51
3342.94	7894.51
3343.43	6001.51
3343.91	6458.51
3344.4	4988.51
3344.89	3963.51
3345.38	4373.51
3345.87	6328.51
3346.36	6647.51
3346.85	6360.51
3347.34	5079.51
3347.82	4601.51
3348.31	6895.51
3348.8	8177.51
3349.29	6063.51
3349.78	5901.51
3350.27	7200.51
3350.76	6375.51
3351.25	10410.5
3351.73	13455.5
3352.22	14639.5
3352.71	14409.5
3353.2	16242.5
3353.69	18589.5
3354.18	19795.5
3354.67	22004.5
3355.16	23569.5
3355.64	24343.5
3356.13	27842.5
3356.62	26959.5
3357.11	27659.5
3357.6	28899.5
3358.09	29985.5
3358.58	28717.5
3359.07	23238.5
3359.55	21866.5
3360.04	20480.5
3360.53	19686.5
3361.02	15676.5
3361.51	9475.51
3362	3473.51
3362.49	292.515
3362.98	-4241.49
3363.46	-8653.49
3363.95	-10986.5
3364.44	-14866.5
3364.93	-18978.5
3365.42	-23304.5
3365.91	-26332.5
3366.4	-29872.5
3366.89	-31923.5
3367.37	-32829.5
3367.86	-32950.5
3368.35	-34427.5
3368.84	-33095.5
3369.33	-33074.5
3369.82	-31258.5
3370.31	-30187.5
3370.8	-27342.5
3371.28	-26383.5
3371.77	-24506.5
3372.26	-22153.5
3372.75	-19548.5
3373.24	-19642.5
3373.73	-19701.5
3374.22	-17633.5
3374.71	-17500.5
3375.19	-19108.5
3375.68	-17640.5
3376.17	-14841.5
3376.66	-14437.5
3377.15	-16625.5
3377.64	-15516.5
3378.13	-16254.5
3378.62	-15134.5
3379.1	-14203.5
3379.59	-12275.5
3380.08	-10783.5
3380.57	-8404.49
3381.06	-7385.49
3381.55	-4971.49
3382.04	-6093.49
3382.53	-4652.49
3383.01	-2332.49
3383.5	-1533.49
3383.99	-1383.49
3384.48	-959.485
3384.97	-2579.49
3385.46	-2683.49
3385.95	-3766.49
3386.44	-5649.49
3386.92	-4658.49
3387.41	-3652.49
3387.9	-4026.49
3388.39	-5271.49
3388.88	-3026.49
3389.37	-3021.49
3389.86	-5198.49
3390.35	-4050.49
3390.83	-2666.49
3391.32	-2693.49
3391.81	-4239.49
3392.3	-3697.49
3392.79	-1555.49
3393.28	-4011.49
3393.77	-5716.49
3394.26	-6224.49
3394.74	-6078.49
3395.23	-5730.49
3395.72	-3472.49
3396.21	-2007.49
3396.7	-2106.49
3397.19	-3887.49
3397.68	-4546.49
3398.17	-5388.49
3398.66	-6077.49
3399.14	-5968.49
3399.63	-4613.49
3400.12	-4650.49
3400.61	-4129.49
3401.1	-5015.49
3401.59	-4772.49
3402.08	-5179.49
3402.56	-5180.49
3403.05	-5628.49
3403.54	-3690.49
3404.03	-3793.49
3404.52	-4175.49
3405.01	-1956.49
3405.5	-3077.49
3405.99	-4434.49
3406.48	-4206.49
3406.96	-1737.49
3407.45	-2942.49
3407.94	-4229.49
3408.43	-3598.49
3408.92	-3226.49
3409.41	-4166.49
3409.9	-7561.49
3410.39	-6051.49
3410.87	-3187.49
3411.36	-2904.49
3411.85	-3487.49
3412.34	-4305.49
3412.83	-5058.49
3413.32	-5762.49
3413.81	-5774.49
3414.3	-3590.49
3414.78	-1810.49
3415.27	-2821.49
3415.76	-4511.49
3416.25	-2214.49
3416.74	-1602.49
3417.23	-2615.49
3417.72	-2650.49
3418.21	-2212.49
3418.69	-1439.49
3419.18	-123.485
3419.67	900.515
3420.16	449.515
3420.65	-302.485
3421.14	1412.51
3421.63	2576.51
3422.12	2906.51
3422.6	386.515
3423.09	-1438.49
3423.58	-2927.49
3424.07	-4012.49
3424.56	-2667.49
3425.05	-2898.49
3425.54	-2088.49
3426.03	653.515
3426.51	231.515
3427	-1913.49
3427.49	-2846.49
3427.98	-1517.49
3428.47	-1260.49
3428.96	644.515
3429.45	178.515
3429.94	263.515
3430.42	2102.51
3430.91	234.515
3431.4	-34.4854
3431.89	818.515
3432.38	1231.51
3432.87	2696.51
3433.36	1813.51
3433.85	2350.51
3434.33	3270.51
3434.82	2483.51
3435.31	1138.51
3435.8	1053.51
3436.29	1970.51
3436.78	1229.51
3437.27	2513.51
3437.76	3083.51
3438.24	1217.51
3438.73	574.515
3439.22	-642.485
3439.71	67.5146
3440.2	-1079.49
3440.69	-2904.49
3441.18	-380.485
3441.67	964.515
3442.15	-958.485
3442.64	-551.485
3443.13	-2130.49
3443.62	-2147.49
3444.11	-2780.49
3444.6	-3605.49
3445.09	-5871.49
3445.58	-6004.49
3446.06	-4362.49
3446.55	-3394.49
3447.04	-4435.49
3447.53	-3854.49
3448.02	-4075.49
3448.51	-3286.49
3449	-3822.49
3449.49	-2526.49
3449.97	-2228.49
3450.46	-996.485
3450.95	873.515
3451.44	501.515
3451.93	1102.51
3452.42	1062.51
3452.91	1352.51
3453.4	1306.51
3453.88	-440.485
3454.37	-636.485
3454.86	1750.51
3455.35	2862.51
3455.84	585.515
3456.33	-982.485
3456.82	483.515
3457.31	1706.51
3457.79	2925.51
3458.28	1690.51
3458.77	2286.51
3459.26	3202.51
3459.75	2231.51
3460.24	1283.51
3460.73	3014.51
3461.22	3121.51
3461.7	1103.51
3462.19	-1330.49
3462.68	-2405.49
3463.17	-1014.49
3463.66	1250.51
3464.15	-188.485
3464.64	-1533.49
3465.13	-77.4854
3465.61	-105.485
3466.1	-1369.49
3466.59	-250.485
3467.08	-1075.49
3467.57	-1393.49
3468.06	-1894.49
3468.55	-286.485
3469.04	-1154.49
3469.52	-1411.49
3470.01	-494.485
3470.5	-1293.49
3470.99	-387.485
3471.48	-2138.49
3471.97	-420.485
3472.46	1297.51
3472.95	-2962.49
3473.44	-4376.49
3473.92	-3450.49
3474.41	-3748.49
3474.9	-639.485
3475.39	1905.51
3475.88	665.515
3476.37	925.515
3476.86	1888.51
3477.34	3263.51
3477.83	1302.51
3478.32	1412.51
3478.81	700.515
3479.3	90.5146
3479.79	-763.485
3480.28	-1768.49
3480.77	-3188.49
3481.26	-1008.49
3481.74	1063.51
3482.23	-87.4854
3482.72	-392.485
3483.21	-185.485
3483.7	-160.485
3484.19	1366.51
3484.68	3358.51
3485.17	3552.51
3485.65	2825.51
3486.14	1335.51
3486.63	328.515
3487.12	-645.485
3487.61	1498.51
3488.1	2394.51
3488.59	1973.51
3489.08	737.515
3489.56	800.515
3490.05	108.515
3490.54	-903.485
3491.03	-2335.49
3491.52	-3383.49
3492.01	-2218.49
3492.5	-2018.49
3492.99	-1807.49
3493.47	-3701.49
3493.96	-2893.49
3494.45	-1846.49
3494.94	-3592.49
3495.43	-3683.49
3495.92	-3925.49
3496.41	-4327.49
3496.9	-3876.49
3497.38	-4175.49
3497.87	-3202.49
3498.36	-3680.49
3498.85	-3734.49
3499.34	-1710.49
3499.83	-2765.49
3500.32	-4611.49
3500.81	-4654.49
3501.29	-1977.49
3501.78	-1010.49
3502.27	-1099.49
3502.76	514.515
3503.25	1269.51
3503.74	729.515
3504.23	1364.51
3504.72	1292.51
3505.2	-954.485
3505.69	-1490.49
3506.18	283.515
3506.67	-1411.49
3507.16	-2088.49
3507.65	-1033.49
3508.14	-1190.49
3508.63	-2180.49
3509.11	-2006.49
3509.6	-3663.49
3510.09	-3793.49
3510.58	-3272.49
3511.07	-2898.49
3511.56	-2745.49
3512.05	-1509.49
3512.54	-409.485
3513.02	-71.4854
3513.51	119.515
3514	536.515
3514.49	-775.485
3514.98	-1785.49
3515.47	-3655.49
3515.96	-4455.49
3516.45	-4457.49
3516.93	-4596.49
3517.42	-5020.49
3517.91	-4716.49
3518.4	-3526.49
3518.89	-1460.49
3519.38	-2145.49
3519.87	-204.485
3520.36	1512.51
3520.84	-217.485
3521.33	-691.485
3521.82	-602.485
3522.31	-3187.49
3522.8	-6131.49
3523.29	-5238.49
3523.78	-3745.49
3524.27	-5392.49
3524.75	-6425.49
3525.24	-6286.49
3525.73	-5235.49
3526.22	-6238.49
3526.71	-5555.49
3527.2	-4811.49
3527.69	-5939.49
3528.18	-6296.49
3528.66	-4336.49
3529.15	-5002.49
3529.64	-4984.49
3530.13	-4202.49
3530.62	-5704.49
3531.11	-5510.49
3531.6	-3309.49
3532.09	-4156.49
3532.57	-4256.49
3533.06	-2910.49
3533.55	-1587.49
3534.04	-2968.49
3534.53	-2327.49
3535.02	-2641.49
3535.51	-2847.49
3536	-805.485
3536.48	-1007.49
3536.97	-2977.49
3537.46	-4202.49
3537.95	-5374.49
3538.44	-3845.49
3538.93	-4365.49
3539.42	-4029.49
3539.91	-2399.49
3540.4	-616.485
3540.88	-2117.49
3541.37	-488.485
3541.86	-478.485
3542.35	-221.485
3542.84	2099.51
3543.33	1470.51
3543.82	-880.485
3544.3	109.515
3544.79	1197.51
3545.28	1202.51
3545.77	827.515
3546.26	-1731.49
3546.75	-5094.49
3547.24	-3683.49
3547.73	-3273.49
3548.22	-2925.49
3548.7	-2216.49
3549.19	-4177.49
3549.68	-4636.49
3550.17	-4481.49
3550.66	-5783.49
3551.15	-3794.49
3551.64	-1114.49
3552.13	-2587.49
3552.61	-2481.49
3553.1	-2498.49
3553.59	-1683.49
3554.08	-610.485
3554.57	1020.51
3555.06	1391.51
3555.55	387.515
3556.04	-1460.49
3556.52	-2055.49
3557.01	-2103.49
3557.5	-1855.49
3557.99	-2923.49
3558.48	-3587.49
3558.97	-2512.49
3559.46	-3481.49
3559.95	-4918.49
3560.43	-5245.49
3560.92	-5201.49
3561.41	-7033.49
3561.9	-5467.49
3562.39	-5180.49
3562.88	-3095.49
3563.37	-2830.49
3563.86	-2860.49
3564.34	-3816.49
3564.83	-5350.49
3565.32	-3242.49
3565.81	-1016.49
3566.3	129.515
3566.79	-1235.49
3567.28	-1498.49
3567.77	-60.4854
3568.25	-287.485
3568.74	645.515
3569.23	807.515
3569.72	-1522.49
3570.21	-1109.49
3570.7	159.515
3571.19	232.515
3571.68	-820.485
3572.16	-1048.49
3572.65	-2442.49
3573.14	-1775.49
3573.63	-644.485
3574.12	-865.485
3574.61	612.515
3575.1	915.515
3575.59	1062.51
3576.07	2028.51
3576.56	-407.485
3577.05	-925.485
3577.54	452.515
3578.03	1729.51
3578.52	662.515
3579.01	-461.485
3579.5	-911.485
3579.98	-1482.49
3580.47	-733.485
3580.96	-941.485
3581.45	-2012.49
3581.94	-1081.49
3582.43	-862.485
3582.92	-509.485
3583.41	-1219.49
3583.89	-1778.49
3584.38	-1379.49
3584.87	55.5146
3585.36	1462.51
3585.85	791.515
3586.34	1101.51
3586.83	559.515
3587.32	809.515
3587.8	1224.51
3588.29	1649.51
3588.78	2880.51
3589.27	2639.51
3589.76	3198.51
3590.25	3381.51
3590.74	1055.51
3591.23	1367.51
3591.71	982.515
3592.2	1693.51
3592.69	3384.51
3593.18	2309.51
3593.67	932.515
3594.16	2053.51
3594.65	-299.485
3595.14	-473.485
3595.62	453.515
3596.11	185.515
3596.6	-1016.49
3597.09	94.5146
3597.58	302.515
3598.07	-1962.49
3598.56	-1561.49
3599.05	-796.485
3599.53	-1745.49
3600.02	-1923.49
3600.51	172.515
3601	1100.51
3601.49	-1136.49
3601.98	-1149.49
3602.47	-290.485
3602.96	-677.485
3603.44	-454.485
3603.93	-806.485
3604.42	262.515
3604.91	607.515
3605.4	1151.51
3605.89	-145.485
3606.38	-2672.49
3606.87	-1595.49
3607.35	677.515
3607.84	-1151.49
3608.33	-2489.49
3608.82	-3431.49
3609.31	-3947.49
3609.8	-3022.49
3610.29	-1971.49
3610.78	-2547.49
3611.26	-1003.49
3611.75	-618.485
3612.24	-1228.49
3612.73	-375.485
3613.22	479.515
3613.71	-580.485
3614.2	-843.485
3614.69	-337.485
3615.18	-1374.49
3615.66	-1995.49
3616.15	-1589.49
3616.64	-314.485
3617.13	416.515
3617.62	-483.485
3618.11	-2245.49
3618.6	-3785.49
3619.08	-4333.49
3619.57	-3193.49
3620.06	-2788.49
3620.55	-3513.49
3621.04	-3558.49
3621.53	-4707.49
3622.02	-5320.49
3622.51	-2176.49
3623	-1298.49
3623.48	-1303.49
3623.97	-96.4854
3624.46	53.5146
3624.95	883.515
3625.44	-1473.49
3625.93	-2887.49
3626.42	-3042.49
3626.91	-4306.49
3627.39	-3294.49
3627.88	-3652.49
3628.37	-4239.49
3628.86	-1795.49
3629.35	611.515
3629.84	1085.51
3630.33	-242.485
3630.82	-1272.49
3631.3	-2307.49
3631.79	-1622.49
3632.28	-2427.49
3632.77	-1760.49
3633.26	-1351.49
3633.75	-3329.49
3634.24	-3208.49
3634.73	-3130.49
3635.21	-2164.49
3635.7	-1186.49
3636.19	-3233.49
3636.68	-3301.49
3637.17	-3844.49
3637.66	-4275.49
3638.15	-3344.49
3638.64	-2015.49
3639.12	-1369.49
3639.61	-1759.49
3640.1	-2062.49
3640.59	-2380.49
3641.08	-798.485
3641.57	430.515
3642.06	827.515
3642.55	-805.485
3643.03	-1375.49
3643.52	102.515
3644.01	-1024.49
3644.5	-187.485
3644.99	1112.51
3645.48	1793.51
3645.97	1018.51
3646.46	-153.485
3646.94	-341.485
3647.43	138.515
3647.92	-309.485
3648.41	726.515
3648.9	-1818.49
3649.39	-2860.49
3649.88	-2460.49
3650.37	-3743.49
3650.85	-3522.49
3651.34	-2683.49
3651.83	-4173.49
3652.32	-2257.49
3652.81	-2304.49
3653.3	-3106.49
3653.79	-4816.49
3654.28	-5699.49
3654.76	-3358.49
3655.25	-2334.49
3655.74	-4276.49
3656.23	-3576.49
3656.72	-1445.49
3657.21	-2182.49
3657.7	-747.485
3658.19	-1162.49
3658.67	125.515
3659.16	189.515
3659.65	-1649.49
3660.14	-646.485
3660.63	-239.485
3661.12	-391.485
3661.61	-523.485
3662.1	-463.485
3662.58	118.515
3663.07	-362.485
3663.56	-1303.49
3664.05	-480.485
3664.54	-2141.49
3665.03	-3601.49
3665.52	-2681.49
3666.01	-1990.49
3666.49	-1993.49
3666.98	-1735.49
3667.47	-1945.49
3667.96	-2791.49
3668.45	-4478.49
3668.94	-2458.49
3669.43	-1374.49
3669.92	-2723.49
3670.4	-1897.49
3670.89	-3488.49
3671.38	-2680.49
3671.87	-2732.49
3672.36	-3910.49
3672.85	-2769.49
3673.34	-2489.49
3673.83	-3825.49
3674.31	-1754.49
3674.8	-171.485
3675.29	-392.485
3675.78	-862.485
3676.27	-1234.49
3676.76	-1770.49
3677.25	-273.485
3677.74	-1254.49
3678.22	-1380.49
3678.71	210.515
3679.2	2808.51
3679.69	3740.51
3680.18	1704.51
3680.67	-403.485
3681.16	-506.485
3681.65	457.515
3682.14	1603.51
3682.62	211.515
3683.11	-1120.49
3683.6	-318.485
3684.09	261.515
3684.58	2069.51
3685.07	4021.51
3685.56	3406.51
3686.04	2541.51
3686.53	1771.51
3687.02	1939.51
3687.51	1146.51
3688	1793.51

## Sheet: Sheet4
X [G]	Intensity			DspeG+pSodA
3188	4372.54
3188.49	6028.54
3188.98	7477.54
3189.47	8297.54
3189.96	10584.5
3190.44	10401.5
3190.93	11543.5
3191.42	11726.5
3191.91	10996.5
3192.4	11403.5
3192.89	10573.5
3193.38	10293.5
3193.86	10501.5
3194.35	8590.54
3194.84	7933.54
3195.33	7261.54
3195.82	6309.54
3196.31	3820.54
3196.8	4462.54
3197.29	6157.54
3197.78	6508.54
3198.26	6991.54
3198.75	9696.54
3199.24	9653.54
3199.73	7352.54
3200.22	8246.54
3200.71	7922.54
3201.2	9413.54
3201.69	8459.54
3202.17	8279.54
3202.66	4983.54
3203.15	5010.54
3203.64	4839.54
3204.13	6014.54
3204.62	6801.54
3205.11	6828.54
3205.6	7128.54
3206.08	6964.54
3206.57	8470.54
3207.06	8802.54
3207.55	9560.54
3208.04	8876.54
3208.53	7170.54
3209.02	6049.54
3209.51	6402.54
3209.99	7300.54
3210.48	7634.54
3210.97	6825.54
3211.46	5635.54
3211.95	5275.54
3212.44	4954.54
3212.93	5656.54
3213.42	6489.54
3213.9	5910.54
3214.39	6687.54
3214.88	5698.54
3215.37	5440.54
3215.86	6706.54
3216.35	6945.54
3216.84	6773.54
3217.33	5466.54
3217.81	5805.54
3218.3	5300.54
3218.79	4022.54
3219.28	5381.54
3219.77	5998.54
3220.26	6324.54
3220.75	4869.54
3221.24	4476.54
3221.72	3071.54
3222.21	3765.54
3222.7	3476.54
3223.19	3574.54
3223.68	4057.54
3224.17	2949.54
3224.66	3461.54
3225.15	5775.54
3225.63	5251.54
3226.12	4530.54
3226.61	4400.54
3227.1	3830.54
3227.59	2811.54
3228.08	2684.54
3228.57	3020.54
3229.06	2437.54
3229.54	2766.54
3230.03	4112.54
3230.52	4107.54
3231.01	4559.54
3231.5	3497.54
3231.99	4622.54
3232.48	4149.54
3232.97	5914.54
3233.45	7614.54
3233.94	6008.54
3234.43	4926.54
3234.92	5360.54
3235.41	5718.54
3235.9	5828.54
3236.39	5674.54
3236.88	6828.54
3237.36	7475.54
3237.85	7073.54
3238.34	5897.54
3238.83	5702.54
3239.32	3730.54
3239.81	3746.54
3240.3	5746.54
3240.79	7329.54
3241.27	8183.54
3241.76	8921.54
3242.25	8637.54
3242.74	7988.54
3243.23	7206.54
3243.72	7100.54
3244.21	7737.54
3244.7	7507.54
3245.18	9049.54
3245.67	8084.54
3246.16	6445.54
3246.65	6395.54
3247.14	7004.54
3247.63	5903.54
3248.12	5493.54
3248.61	7309.54
3249.09	8592.54
3249.58	7445.54
3250.07	7784.54
3250.56	7762.54
3251.05	8265.54
3251.54	7443.54
3252.03	7182.54
3252.52	5937.54
3253	5775.54
3253.49	7035.54
3253.98	8038.54
3254.47	8205.54
3254.96	9458.54
3255.45	8777.54
3255.94	7216.54
3256.43	5111.54
3256.92	5536.54
3257.4	6629.54
3257.89	7167.54
3258.38	6582.54
3258.87	6520.54
3259.36	5817.54
3259.85	5313.54
3260.34	5571.54
3260.82	6652.54
3261.31	5647.54
3261.8	3987.54
3262.29	3564.54
3262.78	3901.54
3263.27	5923.54
3263.76	6258.54
3264.25	5295.54
3264.74	3784.54
3265.22	2339.54
3265.71	3173.54
3266.2	2878.54
3266.69	2280.54
3267.18	3235.54
3267.67	3155.54
3268.16	4247.54
3268.65	4739.54
3269.13	3833.54
3269.62	5232.54
3270.11	3552.54
3270.6	2843.54
3271.09	2130.54
3271.58	3487.54
3272.07	3909.54
3272.56	3329.54
3273.04	3693.54
3273.53	4792.54
3274.02	4712.54
3274.51	5256.54
3275	5881.54
3275.49	4650.54
3275.98	4417.54
3276.47	3715.54
3276.95	3285.54
3277.44	3392.54
3277.93	3825.54
3278.42	2992.54
3278.91	953.536
3279.4	2566.54
3279.89	2456.54
3280.38	1008.54
3280.86	836.536
3281.35	1295.54
3281.84	1641.54
3282.33	2740.54
3282.82	4286.54
3283.31	1455.54
3283.8	-911.464
3284.29	533.536
3284.77	1220.54
3285.26	1965.54
3285.75	1017.54
3286.24	318.536
3286.73	785.536
3287.22	1865.54
3287.71	2179.54
3288.2	1524.54
3288.68	1763.54
3289.17	558.536
3289.66	1950.54
3290.15	2092.54
3290.64	313.536
3291.13	-385.464
3291.62	-925.464
3292.11	510.536
3292.59	1906.54
3293.08	897.536
3293.57	397.536
3294.06	838.536
3294.55	-158.464
3295.04	-431.464
3295.53	554.536
3296.02	-511.464
3296.5	1626.54
3296.99	1755.54
3297.48	187.536
3297.97	1494.54
3298.46	471.536
3298.95	-937.464
3299.44	233.536
3299.93	-1288.46
3300.41	-594.464
3300.9	-414.464
3301.39	429.536
3301.88	2509.54
3302.37	2809.54
3302.86	2907.54
3303.35	4202.54
3303.84	4471.54
3304.32	4516.54
3304.81	3425.54
3305.3	1776.54
3305.79	2582.54
3306.28	2114.54
3306.77	2815.54
3307.26	4445.54
3307.75	2720.54
3308.23	2361.54
3308.72	1397.54
3309.21	592.536
3309.7	-965.464
3310.19	-278.464
3310.68	553.536
3311.17	-506.464
3311.66	964.536
3312.14	-1105.46
3312.63	-2051.46
3313.12	-1271.46
3313.61	-60.4639
3314.1	-486.464
3314.59	-648.464
3315.08	-153.464
3315.57	-1506.46
3316.05	-2216.46
3316.54	-3259.46
3317.03	-2821.46
3317.52	-3174.46
3318.01	-3417.46
3318.5	-2227.46
3318.99	-2519.46
3319.48	-2758.46
3319.96	-2709.46
3320.45	-967.464
3320.94	473.536
3321.43	890.536
3321.92	-900.464
3322.41	-1486.46
3322.9	-1793.46
3323.39	357.536
3323.87	1087.54
3324.36	768.536
3324.85	1855.54
3325.34	1383.54
3325.83	1120.54
3326.32	232.536
3326.81	-196.464
3327.3	1338.54
3327.78	2186.54
3328.27	3207.54
3328.76	4103.54
3329.25	3071.54
3329.74	3749.54
3330.23	4291.54
3330.72	4118.54
3331.21	3595.54
3331.7	1946.54
3332.18	2334.54
3332.67	3643.54
3333.16	3725.54
3333.65	5426.54
3334.14	5264.54
3334.63	4403.54
3335.12	4257.54
3335.6	2225.54
3336.09	2599.54
3336.58	741.536
3337.07	2545.54
3337.56	3444.54
3338.05	3461.54
3338.54	3825.54
3339.03	3908.54
3339.52	3859.54
3340	4734.54
3340.49	6000.54
3340.98	6093.54
3341.47	4175.54
3341.96	3378.54
3342.45	2348.54
3342.94	3671.54
3343.43	5390.54
3343.91	6428.54
3344.4	4898.54
3344.89	4236.54
3345.38	3718.54
3345.87	5482.54
3346.36	5940.54
3346.85	5550.54
3347.34	5056.54
3347.82	4930.54
3348.31	6959.54
3348.8	5949.54
3349.29	5638.54
3349.78	5252.54
3350.27	4892.54
3350.76	5488.54
3351.25	7442.54
3351.73	10426.5
3352.22	9594.54
3352.71	9886.54
3353.2	10676.5
3353.69	9541.54
3354.18	10287.5
3354.67	12942.5
3355.16	14088.5
3355.64	13063.5
3356.13	13221.5
3356.62	15031.5
3357.11	14484.5
3357.6	14771.5
3358.09	14243.5
3358.58	13806.5
3359.07	13770.5
3359.55	10736.5
3360.04	8935.54
3360.53	8401.54
3361.02	7894.54
3361.51	5483.54
3362	2443.54
3362.49	-1229.46
3362.98	-3449.46
3363.46	-5008.46
3363.95	-4099.46
3364.44	-5776.46
3364.93	-8198.46
3365.42	-8740.46
3365.91	-11837.5
3366.4	-14496.5
3366.89	-14210.5
3367.37	-14558.5
3367.86	-13353.5
3368.35	-12945.5
3368.84	-13353.5
3369.33	-15182.5
3369.82	-15166.5
3370.31	-15256.5
3370.8	-15451.5
3371.28	-14951.5
3371.77	-12846.5
3372.26	-12540.5
3372.75	-11542.5
3373.24	-10231.5
3373.73	-9969.46
3374.22	-10141.5
3374.71	-10925.5
3375.19	-11427.5
3375.68	-10301.5
3376.17	-9415.46
3376.66	-10046.5
3377.15	-10431.5
3377.64	-10770.5
3378.13	-11084.5
3378.62	-9519.46
3379.1	-8559.46
3379.59	-8281.46
3380.08	-8171.46
3380.57	-7999.46
3381.06	-9018.46
3381.55	-8694.46
3382.04	-7531.46
3382.53	-8256.46
3383.01	-7753.46
3383.5	-4480.46
3383.99	-2855.46
3384.48	-3195.46
3384.97	-3855.46
3385.46	-4931.46
3385.95	-4367.46
3386.44	-4627.46
3386.92	-3025.46
3387.41	-1456.46
3387.9	-2653.46
3388.39	-3399.46
3388.88	-4803.46
3389.37	-4380.46
3389.86	-4539.46
3390.35	-4875.46
3390.83	-2960.46
3391.32	-3317.46
3391.81	-4038.46
3392.3	-4591.46
3392.79	-5575.46
3393.28	-4939.46
3393.77	-2818.46
3394.26	-2275.46
3394.74	-4408.46
3395.23	-6541.46
3395.72	-6096.46
3396.21	-2697.46
3396.7	-3330.46
3397.19	-4481.46
3397.68	-5979.46
3398.17	-3360.46
3398.66	-2488.46
3399.14	-1592.46
3399.63	-2283.46
3400.12	-1504.46
3400.61	-2156.46
3401.1	-3364.46
3401.59	-4001.46
3402.08	-3172.46
3402.56	-2804.46
3403.05	-2427.46
3403.54	-2350.46
3404.03	-2581.46
3404.52	-2936.46
3405.01	-3683.46
3405.5	-2592.46
3405.99	-2854.46
3406.48	-3658.46
3406.96	-4365.46
3407.45	-3504.46
3407.94	-4569.46
3408.43	-5048.46
3408.92	-6933.46
3409.41	-4632.46
3409.9	-2978.46
3410.39	-3719.46
3410.87	-4423.46
3411.36	-3331.46
3411.85	-2971.46
3412.34	-3318.46
3412.83	-3351.46
3413.32	-3363.46
3413.81	-4139.46
3414.3	-3653.46
3414.78	-1492.46
3415.27	-2103.46
3415.76	-1958.46
3416.25	-1058.46
3416.74	-2978.46
3417.23	-3707.46
3417.72	-3258.46
3418.21	-2221.46
3418.69	-2384.46
3419.18	-2594.46
3419.67	-1690.46
3420.16	-407.464
3420.65	286.536
3421.14	-1045.46
3421.63	-1502.46
3422.12	-940.464
3422.6	853.536
3423.09	-856.464
3423.58	-748.464
3424.07	-1632.46
3424.56	-2720.46
3425.05	-521.464
3425.54	-97.4639
3426.03	809.536
3426.51	780.536
3427	1406.54
3427.49	1602.54
3427.98	591.536
3428.47	171.536
3428.96	-736.464
3429.45	-157.464
3429.94	917.536
3430.42	-248.464
3430.91	-470.464
3431.4	759.536
3431.89	2249.54
3432.38	1655.54
3432.87	1572.54
3433.36	980.536
3433.85	-26.4639
3434.33	-632.464
3434.82	683.536
3435.31	-133.464
3435.8	-286.464
3436.29	319.536
3436.78	568.536
3437.27	436.536
3437.76	1110.54
3438.24	1000.54
3438.73	293.536
3439.22	2076.54
3439.71	2143.54
3440.2	1225.54
3440.69	1865.54
3441.18	1688.54
3441.67	-585.464
3442.15	259.536
3442.64	2011.54
3443.13	1467.54
3443.62	-284.464
3444.11	257.536
3444.6	2428.54
3445.09	2176.54
3445.58	1160.54
3446.06	1393.54
3446.55	1221.54
3447.04	2260.54
3447.53	2298.54
3448.02	1428.54
3448.51	1188.54
3449	363.536
3449.49	-700.464
3449.97	136.536
3450.46	1722.54
3450.95	2093.54
3451.44	-100.464
3451.93	-147.464
3452.42	-725.464
3452.91	-1501.46
3453.4	147.536
3453.88	72.5361
3454.37	-1255.46
3454.86	-1006.46
3455.35	-270.464
3455.84	-605.464
3456.33	-591.464
3456.82	1589.54
3457.31	353.536
3457.79	-2171.46
3458.28	-1657.46
3458.77	-1082.46
3459.26	1073.54
3459.75	2096.54
3460.24	2354.54
3460.73	1373.54
3461.22	3247.54
3461.7	574.536
3462.19	100.536
3462.68	140.536
3463.17	-742.464
3463.66	-2139.46
3464.15	-2146.46
3464.64	-136.464
3465.13	827.536
3465.61	-122.464
3466.1	1098.54
3466.59	-478.464
3467.08	-2409.46
3467.57	-2274.46
3468.06	-1119.46
3468.55	-734.464
3469.04	283.536
3469.52	1027.54
3470.01	-591.464
3470.5	478.536
3470.99	-159.464
3471.48	-1500.46
3471.97	-1306.46
3472.46	-1060.46
3472.95	-1641.46
3473.44	-1593.46
3473.92	-2888.46
3474.41	-3069.46
3474.9	-2436.46
3475.39	-2983.46
3475.88	-3367.46
3476.37	-2356.46
3476.86	-2722.46
3477.34	-2090.46
3477.83	-500.464
3478.32	-529.464
3478.81	-3296.46
3479.3	-2850.46
3479.79	-200.464
3480.28	-969.464
3480.77	-1189.46
3481.26	-2208.46
3481.74	-2484.46
3482.23	-1962.46
3482.72	-2849.46
3483.21	-2911.46
3483.7	-2833.46
3484.19	-2477.46
3484.68	-2285.46
3485.17	3.53613
3485.65	157.536
3486.14	-505.464
3486.63	-791.464
3487.12	-1491.46
3487.61	-1228.46
3488.1	-26.4639
3488.59	-438.464
3489.08	-456.464
3489.56	-448.464
3490.05	-2127.46
3490.54	-2268.46
3491.03	-1150.46
3491.52	-2271.46
3492.01	-1127.46
3492.5	-1585.46
3492.99	-2163.46
3493.47	-244.464
3493.96	-2672.46
3494.45	-1727.46
3494.94	-1091.46
3495.43	-1524.46
3495.92	669.536
3496.41	235.536
3496.9	141.536
3497.38	-316.464
3497.87	-177.464
3498.36	-989.464
3498.85	-154.464
3499.34	618.536
3499.83	503.536
3500.32	562.536
3500.81	-398.464
3501.29	-2466.46
3501.78	-1297.46
3502.27	-2372.46
3502.76	-2892.46
3503.25	-985.464
3503.74	-1139.46
3504.23	-2355.46
3504.72	-3327.46
3505.2	-3228.46
3505.69	-3660.46
3506.18	-3822.46
3506.67	-4008.46
3507.16	-3624.46
3507.65	-3700.46
3508.14	-3495.46
3508.63	-4784.46
3509.11	-7265.46
3509.6	-4312.46
3510.09	-3383.46
3510.58	-4448.46
3511.07	-5125.46
3511.56	-4914.46
3512.05	-5466.46
3512.54	-3871.46
3513.02	-3534.46
3513.51	-3497.46
3514	-3211.46
3514.49	-2774.46
3514.98	-3095.46
3515.47	-1848.46
3515.96	-2058.46
3516.45	-4106.46
3516.93	-4569.46
3517.42	-4075.46
3517.91	-3122.46
3518.4	-3588.46
3518.89	-1684.46
3519.38	-2752.46
3519.87	-3233.46
3520.36	-2505.46
3520.84	-3518.46
3521.33	-5387.46
3521.82	-4700.46
3522.31	-4222.46
3522.8	-4096.46
3523.29	-3660.46
3523.78	-3901.46
3524.27	-2417.46
3524.75	-1787.46
3525.24	-3065.46
3525.73	-4599.46
3526.22	-3846.46
3526.71	-3196.46
3527.2	-3927.46
3527.69	-2499.46
3528.18	-1449.46
3528.66	-3275.46
3529.15	-3774.46
3529.64	-3100.46
3530.13	-2238.46
3530.62	-2691.46
3531.11	-3639.46
3531.6	-3074.46
3532.09	-1538.46
3532.57	-2510.46
3533.06	-3198.46
3533.55	-1440.46
3534.04	-1013.46
3534.53	-1975.46
3535.02	-2894.46
3535.51	-2685.46
3536	-1844.46
3536.48	-243.464
3536.97	-531.464
3537.46	-2224.46
3537.95	-1760.46
3538.44	-821.464
3538.93	-1631.46
3539.42	-1299.46
3539.91	-1552.46
3540.4	-475.464
3540.88	-987.464
3541.37	-496.464
3541.86	-1119.46
3542.35	-1723.46
3542.84	-2213.46
3543.33	-2502.46
3543.82	-1383.46
3544.3	-2266.46
3544.79	-2055.46
3545.28	-1849.46
3545.77	-1674.46
3546.26	-1263.46
3546.75	-789.464
3547.24	-393.464
3547.73	-1581.46
3548.22	-3018.46
3548.7	-2629.46
3549.19	-3685.46
3549.68	-578.464
3550.17	-2578.46
3550.66	-2945.46
3551.15	-2478.46
3551.64	-1471.46
3552.13	958.536
3552.61	686.536
3553.1	-681.464
3553.59	-2329.46
3554.08	-2338.46
3554.57	-814.464
3555.06	-1506.46
3555.55	170.536
3556.04	875.536
3556.52	-209.464
3557.01	-482.464
3557.5	-611.464
3557.99	-2545.46
3558.48	-1579.46
3558.97	-304.464
3559.46	-1579.46
3559.95	-1336.46
3560.43	-510.464
3560.92	-1343.46
3561.41	-1424.46
3561.9	-1475.46
3562.39	-567.464
3562.88	-408.464
3563.37	156.536
3563.86	7.53613
3564.34	-407.464
3564.83	-364.464
3565.32	-691.464
3565.81	-1059.46
3566.3	-2239.46
3566.79	-2440.46
3567.28	-2330.46
3567.77	-2511.46
3568.25	-3933.46
3568.74	-3482.46
3569.23	-3593.46
3569.72	-3382.46
3570.21	-3432.46
3570.7	-2579.46
3571.19	-1242.46
3571.68	-581.464
3572.16	-930.464
3572.65	-1854.46
3573.14	-163.464
3573.63	-1228.46
3574.12	-398.464
3574.61	517.536
3575.1	-216.464
3575.59	-584.464
3576.07	-2717.46
3576.56	-2363.46
3577.05	-2482.46
3577.54	-1132.46
3578.03	-1163.46
3578.52	-1538.46
3579.01	-2091.46
3579.5	-1521.46
3579.98	-1965.46
3580.47	-957.464
3580.96	-2552.46
3581.45	-2350.46
3581.94	-1491.46
3582.43	-1642.46
3582.92	-1843.46
3583.41	-906.464
3583.89	-15.4639
3584.38	-1331.46
3584.87	-251.464
3585.36	415.536
3585.85	305.536
3586.34	310.536
3586.83	-1210.46
3587.32	-3026.46
3587.8	-1325.46
3588.29	-1216.46
3588.78	-2068.46
3589.27	-1399.46
3589.76	-898.464
3590.25	-795.464
3590.74	-2147.46
3591.23	-2945.46
3591.71	-2592.46
3592.2	-1225.46
3592.69	-924.464
3593.18	-1780.46
3593.67	-1518.46
3594.16	-1010.46
3594.65	854.536
3595.14	1491.54
3595.62	1896.54
3596.11	682.536
3596.6	-422.464
3597.09	-469.464
3597.58	335.536
3598.07	-567.464
3598.56	454.536
3599.05	495.536
3599.53	537.536
3600.02	-1407.46
3600.51	-1472.46
3601	-1657.46
3601.49	-1430.46
3601.98	-1721.46
3602.47	-1770.46
3602.96	-3430.46
3603.44	-4199.46
3603.93	-3996.46
3604.42	-4017.46
3604.91	-4438.46
3605.4	-3982.46
3605.89	-4172.46
3606.38	-4818.46
3606.87	-4895.46
3607.35	-4927.46
3607.84	-2275.46
3608.33	-4514.46
3608.82	-5455.46
3609.31	-5389.46
3609.8	-4215.46
3610.29	-3682.46
3610.78	-3253.46
3611.26	-4103.46
3611.75	-4931.46
3612.24	-5115.46
3612.73	-3520.46
3613.22	-2955.46
3613.71	-3336.46
3614.2	-3739.46
3614.69	-3043.46
3615.18	-5300.46
3615.66	-4108.46
3616.15	-3020.46
3616.64	-4200.46
3617.13	-3684.46
3617.62	-3053.46
3618.11	-2817.46
3618.6	-4519.46
3619.08	-5358.46
3619.57	-3569.46
3620.06	-3288.46
3620.55	-3807.46
3621.04	-3463.46
3621.53	-2444.46
3622.02	-1606.46
3622.51	-3379.46
3623	-5242.46
3623.48	-4945.46
3623.97	-6090.46
3624.46	-4334.46
3624.95	-4373.46
3625.44	-4862.46
3625.93	-2837.46
3626.42	-2739.46
3626.91	-4000.46
3627.39	-3808.46
3627.88	-3218.46
3628.37	-4151.46
3628.86	-3305.46
3629.35	-2639.46
3629.84	-2975.46
3630.33	-3706.46
3630.82	-4670.46
3631.3	-3581.46
3631.79	-3949.46
3632.28	-5003.46
3632.77	-3909.46
3633.26	-2218.46
3633.75	-1511.46
3634.24	-1700.46
3634.73	-2597.46
3635.21	-3538.46
3635.7	-3129.46
3636.19	-3637.46
3636.68	-2072.46
3637.17	-1592.46
3637.66	-2419.46
3638.15	-1944.46
3638.64	-2715.46
3639.12	-3567.46
3639.61	-2362.46
3640.1	-1354.46
3640.59	-1505.46
3641.08	-2606.46
3641.57	-3018.46
3642.06	-4860.46
3642.55	-3987.46
3643.03	-2762.46
3643.52	-2640.46
3644.01	-2667.46
3644.5	-1852.46
3644.99	-2780.46
3645.48	-4136.46
3645.97	-4277.46
3646.46	-4284.46
3646.94	-3617.46
3647.43	-2106.46
3647.92	-1426.46
3648.41	-2022.46
3648.9	-2425.46
3649.39	-1923.46
3649.88	-2071.46
3650.37	-1950.46
3650.85	-2025.46
3651.34	-3198.46
3651.83	-4308.46
3652.32	-3553.46
3652.81	-2029.46
3653.3	-1262.46
3653.79	-2430.46
3654.28	-4269.46
3654.76	-4452.46
3655.25	-2669.46
3655.74	-2016.46
3656.23	-2327.46
3656.72	-3529.46
3657.21	-3861.46
3657.7	-2635.46
3658.19	-3564.46
3658.67	-2407.46
3659.16	-1849.46
3659.65	-1150.46
3660.14	-2285.46
3660.63	-2285.46
3661.12	-1023.46
3661.61	288.536
3662.1	787.536
3662.58	2173.54
3663.07	684.536
3663.56	-517.464
3664.05	-2342.46
3664.54	-2489.46
3665.03	-2633.46
3665.52	-2847.46
3666.01	-3521.46
3666.49	-3323.46
3666.98	-2104.46
3667.47	-1896.46
3667.96	-2362.46
3668.45	-1994.46
3668.94	-3086.46
3669.43	-3188.46
3669.92	-2895.46
3670.4	-2486.46
3670.89	-2575.46
3671.38	-2432.46
3671.87	-1680.46
3672.36	-1643.46
3672.85	-1505.46
3673.34	-278.464
3673.83	-2220.46
3674.31	-2701.46
3674.8	-2088.46
3675.29	-1660.46
3675.78	-1983.46
3676.27	44.5361
3676.76	835.536
3677.25	-953.464
3677.74	-510.464
3678.22	-816.464
3678.71	-165.464
3679.2	1301.54
3679.69	1679.54
3680.18	1161.54
3680.67	-95.4639
3681.16	-1152.46
3681.65	-1522.46
3682.14	-593.464
3682.62	-614.464
3683.11	-1346.46
3683.6	-2136.46
3684.09	389.536
3684.58	380.536
3685.07	-1140.46
3685.56	-1513.46
3686.04	-611.464
3686.53	-2997.46
3687.02	-4794.46
3687.51	-3893.46
3688	-2730.46

## Sheet: Sheet5
X [G]	Intensity		DspeG_pDAK1_SPD
3188	5906.63
3188.49	6957.63
3188.98	7769.63
3189.47	10545.6
3189.96	12457.6
3190.44	13517.6
3190.93	12833.6
3191.42	12159.6
3191.91	12441.6
3192.4	12372.6
3192.89	11855.6
3193.38	12652.6
3193.86	12972.6
3194.35	13295.6
3194.84	11389.6
3195.33	8313.63
3195.82	7648.63
3196.31	7165.63
3196.8	6325.63
3197.29	7072.63
3197.78	6076.63
3198.26	6341.63
3198.75	9181.63
3199.24	9674.63
3199.73	9352.63
3200.22	10701.6
3200.71	9072.63
3201.2	9030.63
3201.69	8692.63
3202.17	7502.63
3202.66	5781.63
3203.15	8503.63
3203.64	9738.63
3204.13	9765.63
3204.62	9772.63
3205.11	10497.6
3205.6	10273.6
3206.08	9744.63
3206.57	7872.63
3207.06	8898.63
3207.55	7795.63
3208.04	7551.63
3208.53	7848.63
3209.02	9387.63
3209.51	9342.63
3209.99	7794.63
3210.48	7058.63
3210.97	7558.63
3211.46	8042.63
3211.95	8026.63
3212.44	7688.63
3212.93	7510.63
3213.42	8210.63
3213.9	7753.63
3214.39	9249.63
3214.88	6834.63
3215.37	5501.63
3215.86	7514.63
3216.35	6446.63
3216.84	6785.63
3217.33	7477.63
3217.81	8081.63
3218.3	7842.63
3218.79	6558.63
3219.28	5380.63
3219.77	6042.63
3220.26	7115.63
3220.75	6202.63
3221.24	6738.63
3221.72	6437.63
3222.21	4206.63
3222.7	4090.63
3223.19	5943.63
3223.68	3470.63
3224.17	518.628
3224.66	446.628
3225.15	470.628
3225.63	1254.63
3226.12	1361.63
3226.61	2289.63
3227.1	3454.63
3227.59	3507.63
3228.08	3044.63
3228.57	413.628
3229.06	-224.372
3229.54	1546.63
3230.03	2332.63
3230.52	2583.63
3231.01	4034.63
3231.5	4713.63
3231.99	4455.63
3232.48	6474.63
3232.97	5403.63
3233.45	6026.63
3233.94	7342.63
3234.43	6541.63
3234.92	8175.63
3235.41	8873.63
3235.9	7762.63
3236.39	6767.63
3236.88	8006.63
3237.36	9323.63
3237.85	10213.6
3238.34	9204.63
3238.83	7739.63
3239.32	8215.63
3239.81	8767.63
3240.3	8906.63
3240.79	8252.63
3241.27	7949.63
3241.76	7887.63
3242.25	9684.63
3242.74	9741.63
3243.23	10504.6
3243.72	10509.6
3244.21	12366.6
3244.7	11120.6
3245.18	10036.6
3245.67	11312.6
3246.16	11676.6
3246.65	12344.6
3247.14	12516.6
3247.63	11749.6
3248.12	12819.6
3248.61	11548.6
3249.09	11895.6
3249.58	11932.6
3250.07	11565.6
3250.56	12140.6
3251.05	11308.6
3251.54	10371.6
3252.03	10915.6
3252.52	10211.6
3253	9122.63
3253.49	8990.63
3253.98	9452.63
3254.47	9733.63
3254.96	11820.6
3255.45	11328.6
3255.94	11265.6
3256.43	11168.6
3256.92	9959.63
3257.4	9396.63
3257.89	8237.63
3258.38	6326.63
3258.87	4734.63
3259.36	7122.63
3259.85	7274.63
3260.34	8248.63
3260.82	8839.63
3261.31	7040.63
3261.8	8908.63
3262.29	9280.63
3262.78	7862.63
3263.27	8196.63
3263.76	6685.63
3264.25	5538.63
3264.74	5754.63
3265.22	5909.63
3265.71	6371.63
3266.2	5538.63
3266.69	5175.63
3267.18	5897.63
3267.67	7432.63
3268.16	8490.63
3268.65	6533.63
3269.13	6770.63
3269.62	6466.63
3270.11	7210.63
3270.6	6596.63
3271.09	4947.63
3271.58	4894.63
3272.07	4952.63
3272.56	7669.63
3273.04	7202.63
3273.53	8356.63
3274.02	6756.63
3274.51	5173.63
3275	5600.63
3275.49	5121.63
3275.98	4576.63
3276.47	5014.63
3276.95	4253.63
3277.44	3084.63
3277.93	1310.63
3278.42	3768.63
3278.91	4858.63
3279.4	4710.63
3279.89	4428.63
3280.38	2015.63
3280.86	2355.63
3281.35	2522.63
3281.84	2433.63
3282.33	2474.63
3282.82	1908.63
3283.31	1968.63
3283.8	2670.63
3284.29	2670.63
3284.77	1511.63
3285.26	3898.63
3285.75	4237.63
3286.24	2369.63
3286.73	4285.63
3287.22	4187.63
3287.71	3221.63
3288.2	1554.63
3288.68	451.628
3289.17	-589.372
3289.66	-250.372
3290.15	-1304.37
3290.64	-37.3721
3291.13	1427.63
3291.62	2175.63
3292.11	1359.63
3292.59	1069.63
3293.08	2783.63
3293.57	4117.63
3294.06	1201.63
3294.55	1243.63
3295.04	2423.63
3295.53	4173.63
3296.02	4091.63
3296.5	708.628
3296.99	-1073.37
3297.48	296.628
3297.97	480.628
3298.46	-436.372
3298.95	-390.372
3299.44	1165.63
3299.93	407.628
3300.41	-1246.37
3300.9	314.628
3301.39	1749.63
3301.88	2835.63
3302.37	2421.63
3302.86	3345.63
3303.35	3350.63
3303.84	2808.63
3304.32	4043.63
3304.81	2798.63
3305.3	3366.63
3305.79	4143.63
3306.28	3194.63
3306.77	2180.63
3307.26	2765.63
3307.75	2381.63
3308.23	-228.372
3308.72	174.628
3309.21	1308.63
3309.7	1028.63
3310.19	1344.63
3310.68	65.6279
3311.17	906.628
3311.66	401.628
3312.14	-472.372
3312.63	-1104.37
3313.12	-2646.37
3313.61	-1187.37
3314.1	-1492.37
3314.59	-2127.37
3315.08	-2473.37
3315.57	-3281.37
3316.05	-3367.37
3316.54	-3032.37
3317.03	-2225.37
3317.52	-2305.37
3318.01	-1765.37
3318.5	737.628
3318.99	1166.63
3319.48	1321.63
3319.96	1609.63
3320.45	1635.63
3320.94	3096.63
3321.43	1699.63
3321.92	3642.63
3322.41	6292.63
3322.9	7959.63
3323.39	8796.63
3323.87	11134.6
3324.36	11620.6
3324.85	14265.6
3325.34	15495.6
3325.83	18006.6
3326.32	21369.6
3326.81	23528.6
3327.3	23574.6
3327.78	24901.6
3328.27	27914.6
3328.76	29598.6
3329.25	31975.6
3329.74	34702.6
3330.23	36419.6
3330.72	38119.6
3331.21	37793.6
3331.7	38453.6
3332.18	38987.6
3332.67	39954.6
3333.16	38143.6
3333.65	37945.6
3334.14	36869.6
3334.63	36605.6
3335.12	35045.6
3335.6	32803.6
3336.09	29651.6
3336.58	26830.6
3337.07	25430.6
3337.56	22595.6
3338.05	19271.6
3338.54	17034.6
3339.03	17522.6
3339.52	16703.6
3340	15501.6
3340.49	13431.6
3340.98	12959.6
3341.47	12362.6
3341.96	13628.6
3342.45	11764.6
3342.94	13192.6
3343.43	14614.6
3343.91	13008.6
3344.4	13580.6
3344.89	15347.6
3345.38	15551.6
3345.87	15845.6
3346.36	15988.6
3346.85	15256.6
3347.34	17800.6
3347.82	21249.6
3348.31	25224.6
3348.8	25909.6
3349.29	28232.6
3349.78	31941.6
3350.27	34747.6
3350.76	36703.6
3351.25	40467.6
3351.73	44554.6
3352.22	48530.6
3352.71	53278.6
3353.2	57904.6
3353.69	61706.6
3354.18	66010.6
3354.67	70394.6
3355.16	73871.6
3355.64	76379.6
3356.13	77687.6
3356.62	78865.6
3357.11	79439.6
3357.6	77498.6
3358.09	75445.6
3358.58	69685.6
3359.07	61750.6
3359.55	53801.6
3360.04	47577.6
3360.53	38279.6
3361.02	28308.6
3361.51	19735.6
3362	8004.63
3362.49	-3867.37
3362.98	-13827.4
3363.46	-26226.4
3363.95	-37755.4
3364.44	-45760.4
3364.93	-54673.4
3365.42	-64460.4
3365.91	-73142.4
3366.4	-78474.4
3366.89	-83794.4
3367.37	-89830.4
3367.86	-91224.4
3368.35	-92237.4
3368.84	-90770.4
3369.33	-88335.4
3369.82	-86348.4
3370.31	-82953.4
3370.8	-77743.4
3371.28	-73503.4
3371.77	-69543.4
3372.26	-64661.4
3372.75	-58830.4
3373.24	-54236.4
3373.73	-49860.4
3374.22	-47298.4
3374.71	-41881.4
3375.19	-38435.4
3375.68	-36658.4
3376.17	-32685.4
3376.66	-29051.4
3377.15	-27663.4
3377.64	-25326.4
3378.13	-22754.4
3378.62	-21780.4
3379.1	-20433.4
3379.59	-19470.4
3380.08	-18797.4
3380.57	-18147.4
3381.06	-16495.4
3381.55	-15326.4
3382.04	-14330.4
3382.53	-13992.4
3383.01	-14246.4
3383.5	-13263.4
3383.99	-10338.4
3384.48	-11441.4
3384.97	-9960.37
3385.46	-11277.4
3385.95	-11546.4
3386.44	-10005.4
3386.92	-7665.37
3387.41	-8926.37
3387.9	-10302.4
3388.39	-10663.4
3388.88	-12003.4
3389.37	-10917.4
3389.86	-9337.37
3390.35	-8313.37
3390.83	-7284.37
3391.32	-9433.37
3391.81	-9087.37
3392.3	-8859.37
3392.79	-7685.37
3393.28	-8498.37
3393.77	-8249.37
3394.26	-8681.37
3394.74	-9094.37
3395.23	-11992.4
3395.72	-12956.4
3396.21	-11746.4
3396.7	-11243.4
3397.19	-12772.4
3397.68	-13592.4
3398.17	-13692.4
3398.66	-14001.4
3399.14	-13912.4
3399.63	-14024.4
3400.12	-14743.4
3400.61	-14960.4
3401.1	-13805.4
3401.59	-14634.4
3402.08	-14538.4
3402.56	-12932.4
3403.05	-12486.4
3403.54	-13941.4
3404.03	-16260.4
3404.52	-17474.4
3405.01	-16044.4
3405.5	-14342.4
3405.99	-15102.4
3406.48	-16179.4
3406.96	-14655.4
3407.45	-13735.4
3407.94	-13522.4
3408.43	-12991.4
3408.92	-13447.4
3409.41	-13326.4
3409.9	-12784.4
3410.39	-11732.4
3410.87	-13105.4
3411.36	-13983.4
3411.85	-12151.4
3412.34	-9946.37
3412.83	-10093.4
3413.32	-8622.37
3413.81	-7051.37
3414.3	-6821.37
3414.78	-8380.37
3415.27	-8762.37
3415.76	-6840.37
3416.25	-5744.37
3416.74	-4921.37
3417.23	-3767.37
3417.72	-3313.37
3418.21	-2363.37
3418.69	-2436.37
3419.18	-3680.37
3419.67	-2845.37
3420.16	-1965.37
3420.65	-948.372
3421.14	-1004.37
3421.63	-154.372
3422.12	1234.63
3422.6	-871.372
3423.09	-1346.37
3423.58	96.6279
3424.07	-434.372
3424.56	87.6279
3425.05	-663.372
3425.54	90.6279
3426.03	780.628
3426.51	1545.63
3427	471.628
3427.49	-1108.37
3427.98	2236.63
3428.47	1854.63
3428.96	1606.63
3429.45	2769.63
3429.94	1414.63
3430.42	2294.63
3430.91	1558.63
3431.4	1432.63
3431.89	1010.63
3432.38	602.628
3432.87	-1045.37
3433.36	-1239.37
3433.85	-1310.37
3434.33	895.628
3434.82	2768.63
3435.31	370.628
3435.8	-47.3721
3436.29	645.628
3436.78	-951.372
3437.27	-283.372
3437.76	323.628
3438.24	2107.63
3438.73	2504.63
3439.22	3304.63
3439.71	3624.63
3440.2	3539.63
3440.69	3237.63
3441.18	4627.63
3441.67	4853.63
3442.15	3273.63
3442.64	4408.63
3443.13	4849.63
3443.62	3875.63
3444.11	1152.63
3444.6	1343.63
3445.09	1369.63
3445.58	1721.63
3446.06	2378.63
3446.55	1783.63
3447.04	3399.63
3447.53	2109.63
3448.02	519.628
3448.51	-916.372
3449	1087.63
3449.49	2493.63
3449.97	3257.63
3450.46	4334.63
3450.95	3642.63
3451.44	2388.63
3451.93	599.628
3452.42	993.628
3452.91	3010.63
3453.4	1598.63
3453.88	1970.63
3454.37	1434.63
3454.86	519.628
3455.35	-2120.37
3455.84	-1936.37
3456.33	-860.372
3456.82	-89.3721
3457.31	718.628
3457.79	1771.63
3458.28	519.628
3458.77	-378.372
3459.26	-2291.37
3459.75	-2081.37
3460.24	-1718.37
3460.73	-972.372
3461.22	-279.372
3461.7	559.628
3462.19	580.628
3462.68	-1131.37
3463.17	-484.372
3463.66	526.628
3464.15	253.628
3464.64	1450.63
3465.13	2070.63
3465.61	2099.63
3466.1	632.628
3466.59	2230.63
3467.08	2287.63
3467.57	868.628
3468.06	1285.63
3468.55	1233.63
3469.04	1125.63
3469.52	997.628
3470.01	-290.372
3470.5	-11.3721
3470.99	805.628
3471.48	99.6279
3471.97	-104.372
3472.46	-651.372
3472.95	503.628
3473.44	-2168.37
3473.92	-1788.37
3474.41	-3398.37
3474.9	-3085.37
3475.39	-2192.37
3475.88	-1319.37
3476.37	-548.372
3476.86	-245.372
3477.34	-340.372
3477.83	-1084.37
3478.32	-663.372
3478.81	-1446.37
3479.3	-1734.37
3479.79	-2030.37
3480.28	-1700.37
3480.77	-662.372
3481.26	-703.372
3481.74	-1182.37
3482.23	-1135.37
3482.72	-1464.37
3483.21	-999.372
3483.7	-1975.37
3484.19	-1027.37
3484.68	-1151.37
3485.17	-568.372
3485.65	-2205.37
3486.14	-1635.37
3486.63	-1068.37
3487.12	-2106.37
3487.61	-2674.37
3488.1	-2030.37
3488.59	-1367.37
3489.08	-350.372
3489.56	-642.372
3490.05	-484.372
3490.54	-14.3721
3491.03	-226.372
3491.52	-379.372
3492.01	14.6279
3492.5	-92.3721
3492.99	-210.372
3493.47	-1061.37
3493.96	73.6279
3494.45	-975.372
3494.94	-1087.37
3495.43	-2040.37
3495.92	-2554.37
3496.41	-2615.37
3496.9	-2638.37
3497.38	-1079.37
3497.87	-866.372
3498.36	-534.372
3498.85	-852.372
3499.34	-1823.37
3499.83	-3269.37
3500.32	-3137.37
3500.81	-3381.37
3501.29	-3473.37
3501.78	-3767.37
3502.27	-4426.37
3502.76	-4262.37
3503.25	-6075.37
3503.74	-5435.37
3504.23	-5239.37
3504.72	-5576.37
3505.2	-5985.37
3505.69	-6744.37
3506.18	-5117.37
3506.67	-5845.37
3507.16	-7892.37
3507.65	-7341.37
3508.14	-6505.37
3508.63	-6291.37
3509.11	-6944.37
3509.6	-6910.37
3510.09	-7790.37
3510.58	-7328.37
3511.07	-7163.37
3511.56	-7948.37
3512.05	-8319.37
3512.54	-8374.37
3513.02	-6241.37
3513.51	-5504.37
3514	-5697.37
3514.49	-6158.37
3514.98	-5170.37
3515.47	-4791.37
3515.96	-4046.37
3516.45	-3431.37
3516.93	-4340.37
3517.42	-5750.37
3517.91	-3647.37
3518.4	-2337.37
3518.89	-4136.37
3519.38	-5238.37
3519.87	-6143.37
3520.36	-5855.37
3520.84	-4941.37
3521.33	-5371.37
3521.82	-4092.37
3522.31	-5033.37
3522.8	-4276.37
3523.29	-4795.37
3523.78	-4390.37
3524.27	-3763.37
3524.75	-3642.37
3525.24	-3561.37
3525.73	-4963.37
3526.22	-5527.37
3526.71	-4282.37
3527.2	-4278.37
3527.69	-4560.37
3528.18	-5791.37
3528.66	-5130.37
3529.15	-2230.37
3529.64	-1988.37
3530.13	-3433.37
3530.62	-3566.37
3531.11	-2995.37
3531.6	-2267.37
3532.09	-3476.37
3532.57	-1710.37
3533.06	-3453.37
3533.55	-5137.37
3534.04	-4219.37
3534.53	-3062.37
3535.02	-4580.37
3535.51	-5846.37
3536	-5458.37
3536.48	-5191.37
3536.97	-3485.37
3537.46	-2253.37
3537.95	-2467.37
3538.44	-4257.37
3538.93	-4562.37
3539.42	-4460.37
3539.91	-1441.37
3540.4	-421.372
3540.88	119.628
3541.37	-1793.37
3541.86	-3770.37
3542.35	-2354.37
3542.84	-862.372
3543.33	-2922.37
3543.82	-2089.37
3544.3	-2139.37
3544.79	-1455.37
3545.28	247.628
3545.77	-2632.37
3546.26	-3280.37
3546.75	-3190.37
3547.24	-3455.37
3547.73	-3773.37
3548.22	-2227.37
3548.7	20.6279
3549.19	-279.372
3549.68	566.628
3550.17	1126.63
3550.66	-446.372
3551.15	-632.372
3551.64	-2212.37
3552.13	-1560.37
3552.61	-1487.37
3553.1	-1867.37
3553.59	-2521.37
3554.08	-2285.37
3554.57	-2425.37
3555.06	-3026.37
3555.55	-3212.37
3556.04	-2015.37
3556.52	-1367.37
3557.01	-2982.37
3557.5	-3733.37
3557.99	-2022.37
3558.48	-77.3721
3558.97	-901.372
3559.46	-422.372
3559.95	-1595.37
3560.43	-1434.37
3560.92	-1359.37
3561.41	1009.63
3561.9	1445.63
3562.39	1244.63
3562.88	386.628
3563.37	-695.372
3563.86	-410.372
3564.34	-1207.37
3564.83	-1148.37
3565.32	-1289.37
3565.81	-101.372
3566.3	-946.372
3566.79	-1717.37
3567.28	-3811.37
3567.77	-1511.37
3568.25	-2608.37
3568.74	-3443.37
3569.23	-4794.37
3569.72	-2824.37
3570.21	-1804.37
3570.7	-1285.37
3571.19	-2171.37
3571.68	-1237.37
3572.16	-1696.37
3572.65	-2361.37
3573.14	-1632.37
3573.63	-2311.37
3574.12	-2559.37
3574.61	-1061.37
3575.1	-755.372
3575.59	-1225.37
3576.07	-1487.37
3576.56	-2314.37
3577.05	-1727.37
3577.54	-2183.37
3578.03	-1607.37
3578.52	504.628
3579.01	-1183.37
3579.5	-1529.37
3579.98	-1913.37
3580.47	-2228.37
3580.96	-3568.37
3581.45	-4573.37
3581.94	-4216.37
3582.43	-1275.37
3582.92	-1205.37
3583.41	-2611.37
3583.89	-2762.37
3584.38	-2548.37
3584.87	-3228.37
3585.36	-2253.37
3585.85	-2078.37
3586.34	-2778.37
3586.83	-1253.37
3587.32	201.628
3587.8	393.628
3588.29	-366.372
3588.78	-826.372
3589.27	-498.372
3589.76	505.628
3590.25	-412.372
3590.74	-1044.37
3591.23	-1466.37
3591.71	-2149.37
3592.2	-3100.37
3592.69	-2035.37
3593.18	-1656.37
3593.67	293.628
3594.16	-51.3721
3594.65	-1910.37
3595.14	-1133.37
3595.62	-364.372
3596.11	-305.372
3596.6	464.628
3597.09	665.628
3597.58	278.628
3598.07	221.628
3598.56	-697.372
3599.05	-1104.37
3599.53	-2066.37
3600.02	-1519.37
3600.51	-3329.37
3601	-6284.37
3601.49	-6288.37
3601.98	-4040.37
3602.47	-4252.37
3602.96	-4131.37
3603.44	-4783.37
3603.93	-3088.37
3604.42	-2594.37
3604.91	-3513.37
3605.4	-5373.37
3605.89	-5705.37
3606.38	-5158.37
3606.87	-5985.37
3607.35	-5197.37
3607.84	-4190.37
3608.33	-4032.37
3608.82	-4446.37
3609.31	-5716.37
3609.8	-5690.37
3610.29	-5364.37
3610.78	-6648.37
3611.26	-7889.37
3611.75	-6676.37
3612.24	-4468.37
3612.73	-4735.37
3613.22	-6227.37
3613.71	-6747.37
3614.2	-5870.37
3614.69	-6264.37
3615.18	-7133.37
3615.66	-5959.37
3616.15	-6934.37
3616.64	-6353.37
3617.13	-7377.37
3617.62	-8162.37
3618.11	-8308.37
3618.6	-7245.37
3619.08	-7509.37
3619.57	-8288.37
3620.06	-7997.37
3620.55	-7036.37
3621.04	-7402.37
3621.53	-5473.37
3622.02	-5941.37
3622.51	-7436.37
3623	-7228.37
3623.48	-7258.37
3623.97	-6482.37
3624.46	-5112.37
3624.95	-4986.37
3625.44	-9123.37
3625.93	-7795.37
3626.42	-5363.37
3626.91	-6342.37
3627.39	-6626.37
3627.88	-6631.37
3628.37	-5980.37
3628.86	-5144.37
3629.35	-5862.37
3629.84	-4375.37
3630.33	-5111.37
3630.82	-5581.37
3631.3	-4881.37
3631.79	-6046.37
3632.28	-5545.37
3632.77	-5072.37
3633.26	-7341.37
3633.75	-7216.37
3634.24	-6425.37
3634.73	-5570.37
3635.21	-3572.37
3635.7	-4980.37
3636.19	-6089.37
3636.68	-7128.37
3637.17	-6429.37
3637.66	-5522.37
3638.15	-5011.37
3638.64	-4879.37
3639.12	-5064.37
3639.61	-4246.37
3640.1	-3797.37
3640.59	-5329.37
3641.08	-4967.37
3641.57	-4184.37
3642.06	-4256.37
3642.55	-4672.37
3643.03	-5551.37
3643.52	-5308.37
3644.01	-4223.37
3644.5	-5558.37
3644.99	-5731.37
3645.48	-7827.37
3645.97	-7529.37
3646.46	-4741.37
3646.94	-3985.37
3647.43	-4331.37
3647.92	-4137.37
3648.41	-4095.37
3648.9	-4324.37
3649.39	-3983.37
3649.88	-3368.37
3650.37	-3426.37
3650.85	-3045.37
3651.34	-5609.37
3651.83	-5668.37
3652.32	-4181.37
3652.81	-1698.37
3653.3	-4033.37
3653.79	-5453.37
3654.28	-3711.37
3654.76	-2314.37
3655.25	-2490.37
3655.74	-4616.37
3656.23	-4096.37
3656.72	-4497.37
3657.21	-5052.37
3657.7	-4553.37
3658.19	-2350.37
3658.67	-2230.37
3659.16	-3301.37
3659.65	-4970.37
3660.14	-4960.37
3660.63	-6431.37
3661.12	-6315.37
3661.61	-3167.37
3662.1	-3918.37
3662.58	-5711.37
3663.07	-4249.37
3663.56	-4591.37
3664.05	-4951.37
3664.54	-4347.37
3665.03	-5608.37
3665.52	-2604.37
3666.01	-2163.37
3666.49	-3862.37
3666.98	-2189.37
3667.47	-1383.37
3667.96	-3081.37
3668.45	-2624.37
3668.94	-468.372
3669.43	-1571.37
3669.92	-2934.37
3670.4	-2958.37
3670.89	-2760.37
3671.38	-3600.37
3671.87	-4220.37
3672.36	-3023.37
3672.85	-1320.37
3673.34	-465.372
3673.83	-581.372
3674.31	-1692.37
3674.8	-2204.37
3675.29	-587.372
3675.78	-2295.37
3676.27	-3291.37
3676.76	-4393.37
3677.25	-4233.37
3677.74	-5209.37
3678.22	-4638.37
3678.71	-3172.37
3679.2	-2931.37
3679.69	-2121.37
3680.18	-1812.37
3680.67	-3177.37
3681.16	-3127.37
3681.65	-1675.37
3682.14	-1552.37
3682.62	-1758.37
3683.11	-1570.37
3683.6	-3066.37
3684.09	-5659.37
3684.58	-4991.37
3685.07	-4808.37
3685.56	-5235.37
3686.04	-4749.37
3686.53	-4402.37
3687.02	-3351.37
3687.51	-4186.37
3688	-4645.37

## Sheet: Sheet6
X [G]	Intensity		DspeG+pDAK1+DMTU+UA+SPD
3240.35	7649.04
3240.74	3828.04
3241.13	2755.04
3241.52	4429.04
3241.91	4179.04
3242.3	5302.04
3242.69	7028.04
3243.08	6164.04
3243.47	5830.04
3243.86	2179.04
3244.26	1850.04
3244.65	994.039
3245.04	2778.04
3245.43	3630.04
3245.82	5010.04
3246.21	3792.04
3246.6	1765.04
3246.99	2316.04
3247.38	3324.04
3247.78	3924.04
3248.17	2576.04
3248.56	3376.04
3248.95	4518.04
3249.34	6054.04
3249.73	4827.04
3250.12	2209.04
3250.51	-353.961
3250.9	-1626.96
3251.29	477.039
3251.69	2434.04
3252.08	1038.04
3252.47	1462.04
3252.86	4424.04
3253.25	6837.04
3253.64	5669.04
3254.03	3611.04
3254.42	6993.04
3254.81	8809.04
3255.2	8432.04
3255.6	8666.04
3255.99	6257.04
3256.38	4647.04
3256.77	3088.04
3257.16	2273.04
3257.55	2841.04
3257.94	3745.04
3258.33	8244.04
3258.72	7449.04
3259.11	7132.04
3259.51	7902.04
3259.9	3887.04
3260.29	-1170.96
3260.68	-1737.96
3261.07	1423.04
3261.46	2923.04
3261.85	5772.04
3262.24	3746.04
3262.63	3813.04
3263.02	5850.04
3263.42	6278.04
3263.81	6721.04
3264.2	5579.04
3264.59	5811.04
3264.98	6412.04
3265.37	6067.04
3265.76	9035.04
3266.15	9339.04
3266.54	7662.04
3266.93	6986.04
3267.33	7259.04
3267.72	4366.04
3268.11	1940.04
3268.5	1135.04
3268.89	-1793.96
3269.28	-1028.96
3269.67	2895.04
3270.06	5791.04
3270.45	6397.04
3270.84	7297.04
3271.24	5623.04
3271.63	4255.04
3272.02	3888.04
3272.41	3898.04
3272.8	3568.04
3273.19	6897.04
3273.58	7995.04
3273.97	7657.04
3274.36	2395.04
3274.75	2271.04
3275.15	980.039
3275.54	1544.04
3275.93	1914.04
3276.32	-279.961
3276.71	2037.04
3277.1	4835.04
3277.49	1533.04
3277.88	-1175.96
3278.27	1220.04
3278.66	3298.04
3279.06	4597.04
3279.45	1203.04
3279.84	-320.961
3280.23	-581.961
3280.62	468.039
3281.01	3243.04
3281.4	2438.04
3281.79	3002.04
3282.18	2075.04
3282.57	2967.04
3282.97	3368.04
3283.36	706.039
3283.75	1176.04
3284.14	1589.04
3284.53	1493.04
3284.92	1995.04
3285.31	2642.04
3285.7	2935.04
3286.09	958.039
3286.48	662.039
3286.88	167.039
3287.27	-324.961
3287.66	-66.9609
3288.05	166.039
3288.44	2681.04
3288.83	760.039
3289.22	512.039
3289.61	843.039
3290	3602.04
3290.4	5022.04
3290.79	3157.04
3291.18	-387.961
3291.57	-3022.96
3291.96	1379.04
3292.35	2079.04
3292.74	-703.961
3293.13	-2727.96
3293.52	-1266.96
3293.91	-203.961
3294.3	1378.04
3294.7	3610.04
3295.09	5344.04
3295.48	7200.04
3295.87	5956.04
3296.26	7190.04
3296.65	6626.04
3297.04	5147.04
3297.43	2698.04
3297.82	-1804.96
3298.22	-1235.96
3298.61	792.039
3299	1611.04
3299.39	1873.04
3299.78	19.0391
3300.17	73.0391
3300.56	-174.961
3300.95	-3325.96
3301.34	-1384.96
3301.73	-1071.96
3302.13	-1868.96
3302.52	117.039
3302.91	582.039
3303.3	-1259.96
3303.69	-4604.96
3304.08	-1711.96
3304.47	526.039
3304.86	-1321.96
3305.25	92.0391
3305.64	2439.04
3306.04	1249.04
3306.43	-2465.96
3306.82	-3519.96
3307.21	-648.961
3307.6	2750.04
3307.99	4864.04
3308.38	-705.961
3308.77	-3096.96
3309.16	666.039
3309.55	-684.961
3309.95	-1682.96
3310.34	-191.961
3310.73	2042.04
3311.12	1823.04
3311.51	820.039
3311.9	1019.04
3312.29	500.039
3312.68	-87.9609
3313.07	-514.961
3313.46	3955.04
3313.86	4279.04
3314.25	-1756.96
3314.64	-3203.96
3315.03	-1480.96
3315.42	-2652.96
3315.81	-428.961
3316.2	-2515.96
3316.59	-1459.96
3316.98	1593.04
3317.37	2240.04
3317.77	-1299.96
3318.16	-2028.96
3318.55	-1271.96
3318.94	-1535.96
3319.33	2740.04
3319.72	1121.04
3320.11	-218.961
3320.5	205.039
3320.89	1241.04
3321.28	1275.04
3321.68	1095.04
3322.07	1681.04
3322.46	2643.04
3322.85	7493.04
3323.24	7831.04
3323.63	5396.04
3324.02	8854.04
3324.41	12457
3324.8	15850
3325.19	15299
3325.59	14146
3325.98	14543
3326.37	18221
3326.76	21824
3327.15	19926
3327.54	20338
3327.93	20838
3328.32	20815
3328.71	19956
3329.1	22653
3329.5	23099
3329.89	23483
3330.28	24527
3330.67	24810
3331.06	23040
3331.45	23354
3331.84	23712
3332.23	23899
3332.62	24225
3333.01	20607
3333.41	16257
3333.8	15131
3334.19	15834
3334.58	11828
3334.97	10413
3335.36	7182.04
3335.75	7301.04
3336.14	8494.04
3336.53	5657.04
3336.92	5621.04
3337.32	3712.04
3337.71	3116.04
3338.1	6259.04
3338.49	6044.04
3338.88	6435.04
3339.27	1139.04
3339.66	-1294.96
3340.05	-1234.96
3340.44	-884.961
3340.83	4134.04
3341.23	5421.04
3341.62	4635.04
3342.01	2280.04
3342.4	2830.04
3342.79	1291.04
3343.18	1222.04
3343.57	3459.04
3343.96	4748.04
3344.35	2404.04
3344.74	1047.04
3345.14	28.0391
3345.53	2822.04
3345.92	1499.04
3346.31	3437.04
3346.7	2038.04
3347.09	3912.04
3347.48	7505.04
3347.87	8621.04
3348.26	6690.04
3348.66	5651.04
3349.05	5873.04
3349.44	6287.04
3349.83	8295.04
3350.22	8497.04
3350.61	11529
3351	14986
3351.39	14942
3351.78	17408
3352.17	18360
3352.56	22238
3352.96	22758
3353.35	26025
3353.74	28884
3354.13	31747
3354.52	36055
3354.91	40001
3355.3	43558
3355.69	44464
3356.08	45358
3356.48	50175
3356.87	46871
3357.26	48893
3357.65	52821
3358.04	50514
3358.43	49558
3358.82	44834
3359.21	41568
3359.6	36524
3359.99	32586
3360.39	25418
3360.78	20350
3361.17	14632
3361.56	6692.04
3361.95	-632.961
3362.34	-9121.96
3362.73	-15638
3363.12	-22577
3363.51	-27245
3363.9	-34558
3364.3	-35137
3364.69	-39573
3365.08	-41197
3365.47	-46559
3365.86	-50475
3366.25	-55135
3366.64	-57176
3367.03	-60273
3367.42	-62052
3367.81	-59046
3368.21	-58852
3368.6	-59833
3368.99	-56796
3369.38	-53133
3369.77	-53368
3370.16	-50789
3370.55	-43465
3370.94	-39594
3371.33	-39900
3371.72	-39780
3372.12	-35660
3372.51	-29427
3372.9	-26336
3373.29	-25251
3373.68	-24271
3374.07	-20345
3374.46	-20256
3374.85	-20312
3375.24	-21974
3375.63	-21798
3376.03	-17240
3376.42	-13261
3376.81	-13019
3377.2	-9724.96
3377.59	-4643.96
3377.98	-4666.96
3378.37	-7009.96
3378.76	-7442.96
3379.15	-5202.96
3379.54	-3613.96
3379.94	-5007.96
3380.33	-7270.96
3380.72	-4436.96
3381.11	-4813.96
3381.5	-4607.96
3381.89	-1371.96
3382.28	3136.04
3382.67	-1004.96
3383.06	-3966.96
3383.45	-1113.96
3383.85	-1112.96
3384.24	992.039
3384.63	-510.961
3385.02	-3990.96
3385.41	-3986.96
3385.8	-7521.96
3386.19	-3752.96
3386.58	-3933.96
3386.97	-2220.96
3387.36	-404.961
3387.76	-1475.96
3388.15	-2887.96
3388.54	-4603.96
3388.93	-4086.96
3389.32	-3873.96
3389.71	-3942.96
3390.1	-3335.96
3390.49	-3761.96
3390.88	-6074.96
3391.27	-6938.96
3391.67	-3474.96
3392.06	-1735.96
3392.45	-978.961
3392.84	-1644.96
3393.23	-5382.96
3393.62	-4584.96
3394.01	-2844.96
3394.4	-2657.96
3394.79	-5874.96
3395.18	-8018.96
3395.58	-5967.96
3395.97	-6627.96
3396.36	-11164
3396.75	-11942
3397.14	-8284.96
3397.53	-7964.96
3397.92	-8504.96
3398.31	-9329.96
3398.7	-13018
3399.09	-13101
3399.49	-10783
3399.88	-5455.96
3400.27	-8881.96
3400.66	-13076
3401.05	-8417.96
3401.44	-8887.96
3401.83	-11607
3402.22	-13627
3402.61	-11601
3403	-9278.96
3403.4	-10346
3403.79	-9841.96
3404.18	-10734
3404.57	-9740.96
3404.96	-11566
3405.35	-11409
3405.74	-10549
3406.13	-10516
3406.52	-8057.96
3406.92	-7894.96
3407.31	-5040.96
3407.7	-7192.96
3408.09	-8204.96
3408.48	-7083.96
3408.87	-5171.96
3409.26	-386.961
3409.65	-3194.96
3410.04	-5061.96
3410.43	-7307.96
3410.82	-7728.96
3411.22	-6252.96
3411.61	-5525.96
3412	-2743.96
3412.39	-895.961
3412.78	-4539.96
3413.17	-2537.96
3413.56	357.039
3413.95	-2365.96
3414.34	-495.961
3414.74	3140.04
3415.13	-58.9609
3415.52	-2569.96
3415.91	698.039
3416.3	1917.04
3416.69	1603.04
3417.08	346.039
3417.47	1470.04
3417.86	-820.961
3418.25	-956.961
3418.65	705.039
3419.04	-462.961
3419.43	2405.04
3419.82	1054.04
3420.21	-694.961
3420.6	-820.961
3420.99	-1263.96
3421.38	-1041.96
3421.77	-433.961
3422.16	-4023.96
3422.56	-3022.96
3422.95	-3086.96
3423.34	-2272.96
3423.73	-979.961
3424.12	-853.961
3424.51	908.039
3424.9	2839.04
3425.29	587.039
3425.68	-1211.96
3426.07	-126.961
3426.47	2630.04
3426.86	1958.04
3427.25	-1336.96
3427.64	442.039
3428.03	2964.04
3428.42	6528.04
3428.81	8342.04
3429.2	4419.04
3429.59	-419.961
3429.98	-1881.96
3430.38	391.039
3430.77	137.039
3431.16	3625.04
3431.55	1376.04
3431.94	-1134.96
3432.33	94.0391
3432.72	-331.961
3433.11	-1020.96
3433.5	212.039
3433.89	180.039
3434.29	4468.04
3434.68	3707.04
3435.07	906.039
3435.46	1214.04
3435.85	2407.04
3436.24	1847.04
3436.63	-1609.96
3437.02	-2736.96
3437.41	-526.961
3437.8	-357.961
3438.2	2737.04
3438.59	-30.9609
3438.98	-2767.96
3439.37	-4097.96
3439.76	-2683.96
3440.15	-962.961
3440.54	-765.961
3440.93	-4111.96
3441.32	-4661.96
3441.71	-2673.96
3442.11	-3093.96
3442.5	-3710.96
3442.89	-2342.96
3443.28	575.039
3443.67	3301.04
3444.06	-172.961
3444.45	1260.04
3444.84	947.039
3445.23	-1183.96
3445.62	-4993.96
3446.02	-4874.96
3446.41	-2411.96
3446.8	30.0391
3447.19	-3620.96
3447.58	-2086.96
3447.97	-85.9609
3448.36	-2551.96
3448.75	-2897.96
3449.14	-2172.96
3449.53	-947.961
3449.93	3631.04
3450.32	2817.04
3450.71	1047.04
3451.1	-5553.96
3451.49	-3139.96
3451.88	-1802.96
3452.27	-2102.96
3452.66	-2977.96
3453.05	1609.04
3453.44	3018.04
3453.84	-771.961
3454.23	-1551.96
3454.62	-1665.96
3455.01	522.039
3455.4	-1816.96
3455.79	-4128.96
3456.18	-4866.96
3456.57	-4092.96
3456.96	-1369.96
3457.35	-2760.96
3457.75	-4202.96
3458.14	-6956.96
3458.53	-6267.96
3458.92	-2646.96
3459.31	760.039
3459.7	-218.961
3460.09	2168.04
3460.48	2639.04
3460.87	911.039
3461.26	759.039
3461.66	2624.04
3462.05	3778.04
3462.44	1237.04
3462.83	1715.04
3463.22	2367.04
3463.61	105.039
3464	-1128.96
3464.39	-1220.96
3464.78	1357.04
3465.18	1019.04
3465.57	-884.961
3465.96	-6658.96
3466.35	-5771.96
3466.74	-986.961
3467.13	1968.04
3467.52	824.039
3467.91	1615.04
3468.3	780.039
3468.69	2627.04
3469.08	1172.04
3469.48	-964.961
3469.87	804.039
3470.26	3348.04
3470.65	1708.04
3471.04	1962.04
3471.43	4848.04
3471.82	6585.04
3472.21	1268.04
3472.6	687.039
3473	-1236.96
3473.39	-243.961
3473.78	-81.9609
3474.17	-1036.96
3474.56	-1753.96
3474.95	-1122.96
3475.34	-1107.96
3475.73	-2288.96
3476.12	-1904.96
3476.51	-2236.96
3476.91	-3611.96
3477.3	-4231.96
3477.69	200.039
3478.08	269.039
3478.47	-1147.96
3478.86	-967.961
3479.25	-2362.96
3479.64	-2008.96
3480.03	-2040.96
3480.42	-2765.96
3480.82	-4405.96
3481.21	-5635.96
3481.6	-1942.96
3481.99	340.039
3482.38	1468.04
3482.77	-812.961
3483.16	-1807.96
3483.55	-1241.96
3483.94	-2514.96
3484.33	-2286.96
3484.73	-297.961
3485.12	2583.04
3485.51	289.039
3485.9	1179.04
3486.29	1314.04
3486.68	-1096.96
3487.07	-1145.96
3487.46	-778.961
3487.85	-1992.96
3488.24	-1377.96
3488.64	365.039
3489.03	-107.961
3489.42	-3576.96
3489.81	-2593.96
3490.2	-3492.96
3490.59	113.039
3490.98	3054.04
3491.37	4567.04
3491.76	1238.04
3492.15	-1345.96
3492.55	918.039
3492.94	2647.04
3493.33	402.039
3493.72	-362.961
3494.11	3319.04
3494.5	796.039
3494.89	411.039
3495.28	-3738.96
3495.67	-2441.96
3496.06	-2384.96
3496.46	-4475.96
3496.85	-2776.96
3497.24	465.039
3497.63	806.039
3498.02	338.039
3498.41	-1525.96
3498.8	-1582.96
3499.19	-101.961
3499.58	500.039
3499.97	484.039
3500.37	3129.04

## Sheet: Sheet7
X [G]	Intensity		DspeG_pSodA_SPD
3188	10318.7
3188.49	12182.7
3188.98	12966.7
3189.47	15073.7
3189.96	12599.7
3190.44	15870.7
3190.93	17371.7
3191.42	20326.7
3191.91	18778.7
3192.4	17087.7
3192.89	19275.7
3193.38	19155.7
3193.86	18834.7
3194.35	20226.7
3194.84	21097.7
3195.33	17972.7
3195.82	13850.7
3196.31	13796.7
3196.8	13300.7
3197.29	12766.7
3197.78	10378.7
3198.26	15050.7
3198.75	16747.7
3199.24	16382.7
3199.73	18197.7
3200.22	16374.7
3200.71	13965.7
3201.2	11986.7
3201.69	13300.7
3202.17	12006.7
3202.66	11116.7
3203.15	10933.7
3203.64	10619.7
3204.13	9778.65
3204.62	13997.7
3205.11	16271.7
3205.6	17249.7
3206.08	14793.7
3206.57	16508.7
3207.06	14633.7
3207.55	15383.7
3208.04	15677.7
3208.53	14236.7
3209.02	16371.7
3209.51	15386.7
3209.99	11796.7
3210.48	11876.7
3210.97	12184.7
3211.46	11290.7
3211.95	12062.7
3212.44	13202.7
3212.93	12495.7
3213.42	13259.7
3213.9	12672.7
3214.39	11532.7
3214.88	12026.7
3215.37	13654.7
3215.86	12257.7
3216.35	12473.7
3216.84	13996.7
3217.33	14663.7
3217.81	13934.7
3218.3	11970.7
3218.79	9840.65
3219.28	11076.7
3219.77	13446.7
3220.26	11014.7
3220.75	10240.7
3221.24	9874.65
3221.72	9190.65
3222.21	11556.7
3222.7	11065.7
3223.19	12120.7
3223.68	10034.7
3224.17	9095.65
3224.66	6564.65
3225.15	5790.65
3225.63	4635.65
3226.12	6999.65
3226.61	6731.65
3227.1	8315.65
3227.59	7718.65
3228.08	8455.65
3228.57	9345.65
3229.06	8226.65
3229.54	9519.65
3230.03	10707.7
3230.52	9690.65
3231.01	9810.65
3231.5	11113.7
3231.99	11769.7
3232.48	10972.7
3232.97	11339.7
3233.45	13993.7
3233.94	13031.7
3234.43	10628.7
3234.92	10903.7
3235.41	10712.7
3235.9	11745.7
3236.39	11586.7
3236.88	12007.7
3237.36	12699.7
3237.85	13296.7
3238.34	15887.7
3238.83	16761.7
3239.32	17255.7
3239.81	16121.7
3240.3	11950.7
3240.79	12674.7
3241.27	14535.7
3241.76	14817.7
3242.25	13401.7
3242.74	12965.7
3243.23	13518.7
3243.72	14409.7
3244.21	14666.7
3244.7	15533.7
3245.18	14695.7
3245.67	16114.7
3246.16	18190.7
3246.65	16340.7
3247.14	16080.7
3247.63	16286.7
3248.12	16608.7
3248.61	14163.7
3249.09	15120.7
3249.58	15342.7
3250.07	15790.7
3250.56	15540.7
3251.05	12579.7
3251.54	13969.7
3252.03	15995.7
3252.52	14429.7
3253	16065.7
3253.49	16795.7
3253.98	17191.7
3254.47	15167.7
3254.96	13936.7
3255.45	13853.7
3255.94	13979.7
3256.43	10385.7
3256.92	7998.65
3257.4	9551.65
3257.89	10663.7
3258.38	9008.65
3258.87	10439.7
3259.36	11607.7
3259.85	13348.7
3260.34	10717.7
3260.82	10964.7
3261.31	8928.65
3261.8	9049.65
3262.29	8329.65
3262.78	7127.65
3263.27	7967.65
3263.76	9715.65
3264.25	8838.65
3264.74	8965.65
3265.22	6474.65
3265.71	7925.65
3266.2	8695.65
3266.69	8332.65
3267.18	10005.7
3267.67	11788.7
3268.16	10113.7
3268.65	9532.65
3269.13	8800.65
3269.62	9973.65
3270.11	8963.65
3270.6	7170.65
3271.09	4496.65
3271.58	3892.65
3272.07	5646.65
3272.56	6082.65
3273.04	7862.65
3273.53	6918.65
3274.02	4781.65
3274.51	5726.65
3275	7209.65
3275.49	5892.65
3275.98	9473.65
3276.47	9504.65
3276.95	5351.65
3277.44	3947.65
3277.93	3283.65
3278.42	3772.65
3278.91	8104.65
3279.4	7919.65
3279.89	3894.65
3280.38	2060.65
3280.86	1322.65
3281.35	3980.65
3281.84	3991.65
3282.33	2779.65
3282.82	5007.65
3283.31	5269.65
3283.8	5530.65
3284.29	6427.65
3284.77	4110.65
3285.26	4171.65
3285.75	3671.65
3286.24	3803.65
3286.73	4943.65
3287.22	4518.65
3287.71	2322.65
3288.2	2180.65
3288.68	814.65
3289.17	1241.65
3289.66	2256.65
3290.15	2367.65
3290.64	1361.65
3291.13	1108.65
3291.62	1980.65
3292.11	1973.65
3292.59	-744.35
3293.08	-395.35
3293.57	-931.35
3294.06	854.65
3294.55	968.65
3295.04	788.65
3295.53	-320.35
3296.02	-2927.35
3296.5	476.65
3296.99	1687.65
3297.48	-445.35
3297.97	-273.35
3298.46	-323.35
3298.95	-1445.35
3299.44	156.65
3299.93	1450.65
3300.41	2178.65
3300.9	1312.65
3301.39	3309.65
3301.88	644.65
3302.37	-564.35
3302.86	-52.3496
3303.35	-605.35
3303.84	2659.65
3304.32	3226.65
3304.81	2592.65
3305.3	2153.65
3305.79	1452.65
3306.28	-1113.35
3306.77	-5.34961
3307.26	-1284.35
3307.75	-1220.35
3308.23	565.65
3308.72	568.65
3309.21	-889.35
3309.7	2758.65
3310.19	-1343.35
3310.68	-3784.35
3311.17	-2415.35
3311.66	-2712.35
3312.14	-3066.35
3312.63	-2369.35
3313.12	-3986.35
3313.61	-3322.35
3314.1	-4154.35
3314.59	-6211.35
3315.08	-7345.35
3315.57	-6896.35
3316.05	-7530.35
3316.54	-5112.35
3317.03	-7275.35
3317.52	-6605.35
3318.01	-6570.35
3318.5	-7263.35
3318.99	-7638.35
3319.48	-5991.35
3319.96	-6337.35
3320.45	-6045.35
3320.94	-5253.35
3321.43	-4290.35
3321.92	-2860.35
3322.41	296.65
3322.9	2702.65
3323.39	-85.3496
3323.87	-2255.35
3324.36	-2641.35
3324.85	-1026.35
3325.34	-907.35
3325.83	-1988.35
3326.32	-2982.35
3326.81	-3953.35
3327.3	-2926.35
3327.78	-1041.35
3328.27	1099.65
3328.76	1831.65
3329.25	3691.65
3329.74	3599.65
3330.23	3105.65
3330.72	3643.65
3331.21	1638.65
3331.7	2207.65
3332.18	4316.65
3332.67	4935.65
3333.16	3721.65
3333.65	5084.65
3334.14	5066.65
3334.63	7092.65
3335.12	4378.65
3335.6	3154.65
3336.09	1994.65
3336.58	1577.65
3337.07	716.65
3337.56	1111.65
3338.05	2105.65
3338.54	1118.65
3339.03	733.65
3339.52	1163.65
3340	1508.65
3340.49	1707.65
3340.98	1143.65
3341.47	1143.65
3341.96	2612.65
3342.45	3762.65
3342.94	2728.65
3343.43	1359.65
3343.91	1890.65
3344.4	2031.65
3344.89	4576.65
3345.38	3922.65
3345.87	3198.65
3346.36	1401.65
3346.85	2086.65
3347.34	3938.65
3347.82	3606.65
3348.31	2530.65
3348.8	3796.65
3349.29	4122.65
3349.78	2142.65
3350.27	3030.65
3350.76	4701.65
3351.25	6929.65
3351.73	7618.65
3352.22	5398.65
3352.71	8006.65
3353.2	9515.65
3353.69	10106.7
3354.18	9854.65
3354.67	10827.7
3355.16	10838.7
3355.64	10364.7
3356.13	10946.7
3356.62	11228.7
3357.11	9918.65
3357.6	12947.7
3358.09	10934.7
3358.58	7414.65
3359.07	6706.65
3359.55	4537.65
3360.04	1765.65
3360.53	-1371.35
3361.02	-4530.35
3361.51	-7042.35
3362	-8061.35
3362.49	-8305.35
3362.98	-8560.35
3363.46	-11982.3
3363.95	-12839.3
3364.44	-13045.3
3364.93	-14508.3
3365.42	-17653.3
3365.91	-22199.3
3366.4	-23065.3
3366.89	-22905.3
3367.37	-22413.3
3367.86	-22904.3
3368.35	-24598.3
3368.84	-25207.3
3369.33	-26569.3
3369.82	-26193.3
3370.31	-20095.3
3370.8	-14448.3
3371.28	-15427.3
3371.77	-15018.3
3372.26	-14108.3
3372.75	-13292.3
3373.24	-12632.3
3373.73	-11419.3
3374.22	-10623.3
3374.71	-10000.3
3375.19	-10922.3
3375.68	-11686.3
3376.17	-9591.35
3376.66	-11122.3
3377.15	-11923.3
3377.64	-10381.3
3378.13	-9736.35
3378.62	-9452.35
3379.1	-10020.3
3379.59	-8537.35
3380.08	-12413.3
3380.57	-11327.3
3381.06	-6021.35
3381.55	-5686.35
3382.04	-8756.35
3382.53	-7075.35
3383.01	-8937.35
3383.5	-8237.35
3383.99	-5350.35
3384.48	-7128.35
3384.97	-7302.35
3385.46	-7843.35
3385.95	-5475.35
3386.44	-7182.35
3386.92	-8033.35
3387.41	-6432.35
3387.9	-4606.35
3388.39	-5004.35
3388.88	-5384.35
3389.37	-5510.35
3389.86	-5058.35
3390.35	-4680.35
3390.83	-3702.35
3391.32	-4613.35
3391.81	-5465.35
3392.3	-3659.35
3392.79	-2929.35
3393.28	-2402.35
3393.77	-1782.35
3394.26	-4152.35
3394.74	-2830.35
3395.23	-106.35
3395.72	-1315.35
3396.21	-290.35
3396.7	-1810.35
3397.19	-1352.35
3397.68	-326.35
3398.17	954.65
3398.66	2999.65
3399.14	4212.65
3399.63	2720.65
3400.12	-705.35
3400.61	-1701.35
3401.1	1686.65
3401.59	3059.65
3402.08	1706.65
3402.56	1300.65
3403.05	665.65
3403.54	-1079.35
3404.03	-505.35
3404.52	-2252.35
3405.01	-1989.35
3405.5	-1375.35
3405.99	-3877.35
3406.48	-5146.35
3406.96	-5126.35
3407.45	-4989.35
3407.94	-4986.35
3408.43	-4756.35
3408.92	-6400.35
3409.41	-6782.35
3409.9	-8017.35
3410.39	-7092.35
3410.87	-6354.35
3411.36	-5291.35
3411.85	-6170.35
3412.34	-5469.35
3412.83	-4339.35
3413.32	-4655.35
3413.81	-5520.35
3414.3	-5104.35
3414.78	-3029.35
3415.27	-2914.35
3415.76	-2343.35
3416.25	-1988.35
3416.74	-1363.35
3417.23	-2859.35
3417.72	-3762.35
3418.21	-3789.35
3418.69	-4867.35
3419.18	-3604.35
3419.67	-3750.35
3420.16	-3164.35
3420.65	-2046.35
3421.14	-2099.35
3421.63	-2691.35
3422.12	-1155.35
3422.6	-1272.35
3423.09	-1237.35
3423.58	1093.65
3424.07	2633.65
3424.56	-869.35
3425.05	-1896.35
3425.54	-1834.35
3426.03	1788.65
3426.51	1646.65
3427	1387.65
3427.49	1678.65
3427.98	1958.65
3428.47	5047.65
3428.96	5621.65
3429.45	4161.65
3429.94	2566.65
3430.42	2831.65
3430.91	1757.65
3431.4	2675.65
3431.89	1523.65
3432.38	1693.65
3432.87	2176.65
3433.36	2332.65
3433.85	1339.65
3434.33	-175.35
3434.82	2341.65
3435.31	1264.65
3435.8	-1075.35
3436.29	628.65
3436.78	-991.35
3437.27	-528.35
3437.76	-275.35
3438.24	-3471.35
3438.73	-1942.35
3439.22	136.65
3439.71	-434.35
3440.2	-2037.35
3440.69	-1785.35
3441.18	-267.35
3441.67	723.65
3442.15	-1416.35
3442.64	-2001.35
3443.13	-383.35
3443.62	1291.65
3444.11	1607.65
3444.6	-404.35
3445.09	-1474.35
3445.58	-1491.35
3446.06	-517.35
3446.55	-1630.35
3447.04	-1174.35
3447.53	1717.65
3448.02	2142.65
3448.51	908.65
3449	1983.65
3449.49	2911.65
3449.97	-176.35
3450.46	156.65
3450.95	695.65
3451.44	2491.65
3451.93	2286.65
3452.42	1563.65
3452.91	3634.65
3453.4	2936.65
3453.88	2054.65
3454.37	227.65
3454.86	-1226.35
3455.35	352.65
3455.84	835.65
3456.33	-1104.35
3456.82	-1354.35
3457.31	27.6504
3457.79	240.65
3458.28	-1255.35
3458.77	517.65
3459.26	928.65
3459.75	489.65
3460.24	-496.35
3460.73	-475.35
3461.22	-1109.35
3461.7	-1903.35
3462.19	738.65
3462.68	1383.65
3463.17	1118.65
3463.66	1183.65
3464.15	2631.65
3464.64	990.65
3465.13	710.65
3465.61	1077.65
3466.1	911.65
3466.59	-983.35
3467.08	-4376.35
3467.57	-2850.35
3468.06	-2576.35
3468.55	-1843.35
3469.04	48.6504
3469.52	2995.65
3470.01	3000.65
3470.5	3410.65
3470.99	1431.65
3471.48	388.65
3471.97	-1182.35
3472.46	975.65
3472.95	118.65
3473.44	-3118.35
3473.92	-2133.35
3474.41	-946.35
3474.9	-157.35
3475.39	-770.35
3475.88	-457.35
3476.37	-429.35
3476.86	-374.35
3477.34	1277.65
3477.83	522.65
3478.32	-1473.35
3478.81	-325.35
3479.3	403.65
3479.79	613.65
3480.28	-2426.35
3480.77	-3644.35
3481.26	1184.65
3481.74	1638.65
3482.23	1574.65
3482.72	-1916.35
3483.21	-261.35
3483.7	-925.35
3484.19	-3609.35
3484.68	-3053.35
3485.17	-587.35
3485.65	-2516.35
3486.14	-3343.35
3486.63	-1766.35
3487.12	-1934.35
3487.61	-2150.35
3488.1	556.65
3488.59	-1160.35
3489.08	-2015.35
3489.56	-1608.35
3490.05	-1104.35
3490.54	-489.35
3491.03	-233.35
3491.52	715.65
3492.01	-983.35
3492.5	-1621.35
3492.99	-1120.35
3493.47	1090.65
3493.96	2532.65
3494.45	-16.3496
3494.94	-2551.35
3495.43	-4680.35
3495.92	-3680.35
3496.41	-3411.35
3496.9	-3001.35
3497.38	-3765.35
3497.87	-2012.35
3498.36	-2596.35
3498.85	-3612.35
3499.34	-3269.35
3499.83	-1718.35
3500.32	-2429.35
3500.81	-3505.35
3501.29	-5258.35
3501.78	-7645.35
3502.27	-8004.35
3502.76	-7039.35
3503.25	-5646.35
3503.74	-6148.35
3504.23	-6634.35
3504.72	-5568.35
3505.2	-4611.35
3505.69	-5372.35
3506.18	-3968.35
3506.67	-5268.35
3507.16	-7021.35
3507.65	-9996.35
3508.14	-9905.35
3508.63	-8405.35
3509.11	-8028.35
3509.6	-6965.35
3510.09	-4848.35
3510.58	-5745.35
3511.07	-4530.35
3511.56	-3554.35
3512.05	-5703.35
3512.54	-5595.35
3513.02	-8197.35
3513.51	-8600.35
3514	-5764.35
3514.49	-7231.35
3514.98	-7250.35
3515.47	-7987.35
3515.96	-6780.35
3516.45	-7013.35
3516.93	-5894.35
3517.42	-6256.35
3517.91	-5106.35
3518.4	-5000.35
3518.89	-8202.35
3519.38	-12221.3
3519.87	-9867.35
3520.36	-7191.35
3520.84	-6541.35
3521.33	-7123.35
3521.82	-6927.35
3522.31	-7047.35
3522.8	-6830.35
3523.29	-6774.35
3523.78	-7206.35
3524.27	-4492.35
3524.75	-3339.35
3525.24	-6902.35
3525.73	-7853.35
3526.22	-6836.35
3526.71	-5542.35
3527.2	-7267.35
3527.69	-7036.35
3528.18	-5116.35
3528.66	-3587.35
3529.15	-3446.35
3529.64	-4200.35
3530.13	-3659.35
3530.62	-5586.35
3531.11	-4163.35
3531.6	-5344.35
3532.09	-8960.35
3532.57	-7767.35
3533.06	-4980.35
3533.55	-5900.35
3534.04	-6713.35
3534.53	-4862.35
3535.02	-6377.35
3535.51	-4533.35
3536	-4197.35
3536.48	-6750.35
3536.97	-6721.35
3537.46	-3906.35
3537.95	-2716.35
3538.44	-3945.35
3538.93	-4750.35
3539.42	-5671.35
3539.91	-4681.35
3540.4	-5988.35
3540.88	-6830.35
3541.37	-4807.35
3541.86	-3416.35
3542.35	-3982.35
3542.84	-7193.35
3543.33	-6792.35
3543.82	-3917.35
3544.3	-3140.35
3544.79	-3396.35
3545.28	-1961.35
3545.77	-4522.35
3546.26	-5324.35
3546.75	-2572.35
3547.24	-2726.35
3547.73	-4294.35
3548.22	-2924.35
3548.7	-4045.35
3549.19	-5067.35
3549.68	-4786.35
3550.17	-3369.35
3550.66	-5400.35
3551.15	-4549.35
3551.64	-2936.35
3552.13	-3509.35
3552.61	-2009.35
3553.1	-4145.35
3553.59	-5022.35
3554.08	-5447.35
3554.57	-2157.35
3555.06	-1924.35
3555.55	-3617.35
3556.04	-2873.35
3556.52	-2842.35
3557.01	-2382.35
3557.5	-1968.35
3557.99	-1158.35
3558.48	-2118.35
3558.97	-1638.35
3559.46	-3851.35
3559.95	-3604.35
3560.43	-3030.35
3560.92	-3229.35
3561.41	-5522.35
3561.9	-3823.35
3562.39	-3679.35
3562.88	-2893.35
3563.37	-2790.35
3563.86	-4492.35
3564.34	-2759.35
3564.83	-3097.35
3565.32	-1943.35
3565.81	-3394.35
3566.3	-6418.35
3566.79	-4592.35
3567.28	-3346.35
3567.77	-3728.35
3568.25	-4557.35
3568.74	-4625.35
3569.23	-3233.35
3569.72	-4160.35
3570.21	-4320.35
3570.7	-4073.35
3571.19	-2796.35
3571.68	-3059.35
3572.16	-1439.35
3572.65	-2717.35
3573.14	-3950.35
3573.63	-4196.35
3574.12	-1077.35
3574.61	-1223.35
3575.1	-2539.35
3575.59	-3809.35
3576.07	-2691.35
3576.56	-3347.35
3577.05	-1558.35
3577.54	1206.65
3578.03	-937.35
3578.52	-3862.35
3579.01	-2392.35
3579.5	-2975.35
3579.98	-3219.35
3580.47	-4746.35
3580.96	-4303.35
3581.45	-2850.35
3581.94	-3135.35
3582.43	-2251.35
3582.92	-3098.35
3583.41	-2242.35
3583.89	-3825.35
3584.38	-4760.35
3584.87	-4678.35
3585.36	-3458.35
3585.85	-4940.35
3586.34	-2987.35
3586.83	-2014.35
3587.32	1795.65
3587.8	4261.65
3588.29	1684.65
3588.78	384.65
3589.27	-1688.35
3589.76	-2588.35
3590.25	-2490.35
3590.74	-2090.35
3591.23	-295.35
3591.71	-1448.35
3592.2	-430.35
3592.69	-1627.35
3593.18	-2519.35
3593.67	-2653.35
3594.16	-2945.35
3594.65	-1633.35
3595.14	-674.35
3595.62	-27.3496
3596.11	-2086.35
3596.6	-3827.35
3597.09	-5379.35
3597.58	-5717.35
3598.07	-4991.35
3598.56	-5961.35
3599.05	-6890.35
3599.53	-4190.35
3600.02	-3374.35
3600.51	-4456.35
3601	-5929.35
3601.49	-7332.35
3601.98	-7001.35
3602.47	-5166.35
3602.96	-4424.35
3603.44	-4445.35
3603.93	-6058.35
3604.42	-5894.35
3604.91	-4359.35
3605.4	-3539.35
3605.89	-4221.35
3606.38	-5341.35
3606.87	-5862.35
3607.35	-6148.35
3607.84	-5421.35
3608.33	-4606.35
3608.82	-5601.35
3609.31	-6878.35
3609.8	-6287.35
3610.29	-6905.35
3610.78	-6020.35
3611.26	-5938.35
3611.75	-7220.35
3612.24	-7494.35
3612.73	-5173.35
3613.22	-4304.35
3613.71	-2808.35
3614.2	-964.35
3614.69	-1453.35
3615.18	-3118.35
3615.66	-4671.35
3616.15	-8552.35
3616.64	-7842.35
3617.13	-6622.35
3617.62	-6329.35
3618.11	-6444.35
3618.6	-6028.35
3619.08	-7019.35
3619.57	-7463.35
3620.06	-5967.35
3620.55	-3599.35
3621.04	-1860.35
3621.53	-1276.35
3622.02	-955.35
3622.51	-3369.35
3623	-6691.35
3623.48	-7196.35
3623.97	-4951.35
3624.46	-5842.35
3624.95	-4583.35
3625.44	-3487.35
3625.93	-3438.35
3626.42	-2738.35
3626.91	-4871.35
3627.39	-2469.35
3627.88	-3087.35
3628.37	-2235.35
3628.86	-2148.35
3629.35	-6504.35
3629.84	-6592.35
3630.33	-6684.35
3630.82	-5330.35
3631.3	-4651.35
3631.79	-5099.35
3632.28	-6253.35
3632.77	-3602.35
3633.26	-508.35
3633.75	-1084.35
3634.24	-2485.35
3634.73	-4216.35
3635.21	-5376.35
3635.7	-4116.35
3636.19	-2716.35
3636.68	-3264.35
3637.17	-3855.35
3637.66	-5006.35
3638.15	-4670.35
3638.64	-3704.35
3639.12	-4063.35
3639.61	-5295.35
3640.1	-5984.35
3640.59	-5800.35
3641.08	-6705.35
3641.57	-5050.35
3642.06	-4399.35
3642.55	-4318.35
3643.03	-3605.35
3643.52	-4254.35
3644.01	-5291.35
3644.5	-4771.35
3644.99	-4529.35
3645.48	-7190.35
3645.97	-6540.35
3646.46	-2936.35
3646.94	-1671.35
3647.43	-3689.35
3647.92	-4419.35
3648.41	-6340.35
3648.9	-4802.35
3649.39	-4605.35
3649.88	-7847.35
3650.37	-5127.35
3650.85	-3673.35
3651.34	-3024.35
3651.83	-3243.35
3652.32	-2276.35
3652.81	-3886.35
3653.3	-3435.35
3653.79	-2242.35
3654.28	-2665.35
3654.76	-1668.35
3655.25	-2076.35
3655.74	-2069.35
3656.23	-2030.35
3656.72	-4154.35
3657.21	-7168.35
3657.7	-6621.35
3658.19	-5285.35
3658.67	-4185.35
3659.16	-2691.35
3659.65	-2668.35
3660.14	-2114.35
3660.63	-1144.35
3661.12	-3231.35
3661.61	-7052.35
3662.1	-6751.35
3662.58	-6083.35
3663.07	-3966.35
3663.56	-1087.35
3664.05	-1329.35
3664.54	-1217.35
3665.03	-1766.35
3665.52	-1066.35
3666.01	-2070.35
3666.49	-3474.35
3666.98	-2870.35
3667.47	387.65
3667.96	-189.35
3668.45	-323.35
3668.94	-2439.35
3669.43	-3516.35
3669.92	-2901.35
3670.4	-934.35
3670.89	-520.35
3671.38	-1633.35
3671.87	-3220.35
3672.36	-3939.35
3672.85	-3659.35
3673.34	-4016.35
3673.83	-4210.35
3674.31	-3903.35
3674.8	-2195.35
3675.29	-5584.35
3675.78	-6807.35
3676.27	-5562.35
3676.76	-3774.35
3677.25	-3166.35
3677.74	-2053.35
3678.22	-2630.35
3678.71	-3063.35
3679.2	-3181.35
3679.69	-4351.35
3680.18	-3677.35
3680.67	-1525.35
3681.16	-3430.35
3681.65	-3434.35
3682.14	-1331.35
3682.62	-294.35
3683.11	-2330.35
3683.6	-1918.35
3684.09	238.65
3684.58	1399.65
3685.07	603.65
3685.56	-2493.35
3686.04	-1706.35
3686.53	-2707.35
3687.02	-3802.35
3687.51	-2431.35
3688	-2856.35
