# Supplementary material for: Free spermidine evokes superoxide radicals that manifest toxicity
Source: eLife. 2022 Apr 13;11:e77704. doi: 10.7554/eLife.77704 (PMC9038194; doi:10.7554/eLife.77704)
Supplement: Figure 3—source data 1. [file elife-77704-fig3-data1.xlsx]

## Sheet: Sheet1
	DspeG	sd	DspeG+SPD	sd	DspeG+SPD+SP	sd	DspeG+SPD+TU	sd	DspeG+SPD+Tr	sd	DspeG+SPD+Asc	sd	DspeG+SPD+NAC	sd
0	0.118	0.00458	0.11633	0.00208	0.119	0.001	0.118	0.002	0.11633	0.00208	0.11967	0.00208	0.119	0.00173
1	0.18533	0.00289	0.124	0.00173	0.13067	0.00208	0.13133	0.00416	0.13567	0.00231	0.13367	0.00208	0.151	0.00265
2	0.40833	0.00321	0.12467	0.00379	0.14167	0.00306	0.14233	0.00451	0.15933	0.00723	0.14267	0.00252	0.28633	0.00503
3	0.58567	0.00493	0.12567	0.00153	0.14167	0.00306	0.14	0.00458	0.186	0.01758	0.15367	0.00153	0.46667	0.02108
4	0.701	0.00656	0.12267	0.00208	0.13733	0.00321	0.132	0.00458	0.249	0.04328	0.185	0.001	0.53267	0.02836
5	0.799	0.00346	0.11733	0.00252	0.13133	0.00153	0.12767	0.00351	0.36633	0.06573	0.286	0	0.58067	0.03614
6	0.88933	0.01321	0.11333	0.00252	0.12467	0.00208	0.121	0.00458	0.45133	0.02811	0.414	0.00866	0.62333	0.03362
7	0.994	0.01608	0.11	0.003	0.12433	0.00057735	0.117	0.00361	0.52133	0.01767	0.50333	0.01168	0.656	0.03422
8	1.06733	0.01569	0.109	0.00361	0.12533	0.00057735	0.116	0.003	0.56	0.00436	0.55733	0.00945	0.679	0.0378
9	1.135	0.0167	0.10733	0.00252	0.126	0.00173	0.115	0.00436	0.578	0.00529	0.61933	0.00981	0.693	0.02524
10	1.175	0.03557	0.107	0.00265	0.14067	0.00635	0.11833	0.01002	0.59367	0.00862	0.66167	0.01358	0.70167	0.02706
11	1.21133	0.03252	0.117	0.01015	0.18	0.01153	0.133	0.02551	0.60033	0.00833	0.71533	0.01305	0.701	0.01709
12	1.276	0.02557	0.149	0.03176	0.28633	0.01361	0.16733	0.05515	0.60767	0.00907	0.76267	0.01115	0.703	0.013
13	1.28233	0.03945	0.229	0.07139	0.418	0.02587	0.219	0.09623	0.612	0.01353	0.788	0.01889	0.70467	0.01626
14	1.30567	0.02862	0.344	0.08271	0.514	0.02007	0.26767	0.12213	0.598	0.01114	0.81367	0.02603	0.696	0.02095
15	1.36067	0.02971	0.43133	0.03302	0.56833	0.0194	0.303	0.12708	0.59267	0.00586	0.831	0.016	0.71	0.01803
16	1.37367	0.03329	0.467	0.03208	0.588	0.019	0.339	0.1183	0.598	0.00794	0.85267	0.01159	0.75	0.02007
