# Supplementary material for: Free spermidine evokes superoxide radicals that manifest toxicity
Source: eLife. 2022 Apr 13;11:e77704. doi: 10.7554/eLife.77704 (PMC9038194; doi:10.7554/eLife.77704)
Supplement: Figure 3—source data 2. [file elife-77704-fig3-data2.xls]

## Sheet: Sheet1
	2022-01-30			2022-01-28
	dspeG (pBAD)			dspeG (pBAD)			dzwf (pBAD)			dzwf (pBAD)			dspeGdzwf (pBAD)			dspeGdzwf(pBAD)			dspegdzwf(pZWF)			dspeGdzwf(pZWF)			dspeG(pBAD)+spd3.2mM			dspeG(pBAD)+spd3.2mM			dzwf(pBAD)+spd3.2mM			dzwf (pBAD)+spd3.2mM			dspeGdzwf(pBAD)+spd3.2mM			dspeGdzwf(pBAD)+spd3.2mM			dspeGdzwf(pBAD)+spd3.2mM			dspeGdzwf(pZWF)+spd3.2mM			dspeGdZwf (pZWF)+spd3.2mM
0	0.106	0.104	0.104	0.111	0.108	0.112	0.104	0.103	0.103	0.119	0.11	0.111	0.099	0.099	0.099	0.112	0.117	0.112	0.1	0.1	0.1	0.114	0.108	0.109	0.105	0.106	0.104	0.111	0.11	0.116	0.107	0.106	0.106	0.116	0.113	0.113	0.102	0.101	0.102	0.128	0.117	0.113	0.106	0.103	0.101	0.106	0.106	0.107	0.12
1	0.203	0.199	0.2	0.185	0.18	0.179	0.201	0.198	0.199	0.193	0.182	0.184	0.18	0.177	0.176	0.193	0.192	0.185	0.18	0.182	0.181	0.177	0.169	0.17	0.111	0.113	0.112	0.117	0.116	0.121	0.173	0.172	0.171	0.156	0.156	0.155	0.111	0.11	0.111	0.137	0.121	0.119	0.113	0.112	0.11	0.131	0.131	0.132	0.128
2	0.419	0.419	0.423	0.397	0.399	0.392	0.376	0.375	0.372	0.37	0.357	0.361	0.361	0.361	0.356	0.406	0.399	0.393	0.357	0.368	0.373	0.373	0.355	0.355	0.119	0.124	0.123	0.128	0.129	0.132	0.302	0.302	0.298	0.269	0.269	0.272	0.122	0.121	0.121	0.146	0.133	0.132	0.122	0.12	0.119	0.178	0.179	0.179	0.235
3	0.559	0.566	0.572	0.581	0.595	0.594	0.516	0.512	0.503	0.567	0.558	0.561	0.49	0.498	0.5	0.601	0.596	0.601	0.499	0.515	0.522	0.587	0.545	0.547	0.121	0.13	0.129	0.137	0.141	0.143	0.456	0.457	0.449	0.453	0.435	0.433	0.126	0.125	0.125	0.155	0.141	0.141	0.123	0.123	0.123	0.28	0.283	0.281	0.4
4	0.698	0.697	0.705	0.744	0.763	0.75	0.618	0.613	0.606	0.703	0.693	0.692	0.596	0.607	0.609	0.738	0.749	0.743	0.605	0.622	0.627	0.753	0.684	0.68	0.132	0.155	0.153	0.148	0.157	0.159	0.548	0.546	0.539	0.593	0.573	0.573	0.127	0.124	0.124	0.151	0.139	0.14	0.122	0.125	0.126	0.438	0.444	0.441	0.538
5	0.777	0.78	0.781	0.874	0.885	0.859	0.673	0.671	0.663	0.793	0.79	0.783	0.657	0.674	0.676	0.845	0.862	0.852	0.673	0.693	0.695	0.852	0.785	0.781	0.132	0.202	0.202	0.206	0.216	0.215	0.586	0.589	0.582	0.649	0.63	0.629	0.122	0.119	0.119	0.145	0.133	0.133	0.116	0.12	0.121	0.502	0.506	0.507	0.617
6	0.897	0.879	0.876	0.997	1.006	0.955	0.745	0.742	0.73	0.868	0.865	0.866	0.723	0.736	0.745	0.941	0.965	0.929	0.746	0.753	0.756	0.936	0.867	0.867	0.144	0.289	0.299	0.322	0.341	0.336	0.645	0.643	0.638	0.708	0.69	0.697	0.121	0.118	0.118	0.142	0.127	0.127	0.115	0.119	0.12	0.552	0.553	0.555	0.68
7	0.974	0.963	0.954	1.134	1.12	1.045	0.802	0.798	0.784	0.938	0.937	0.939	0.791	0.814	0.82	1.026	1.069	1.005	0.826	0.832	0.831	1.023	0.957	0.947	0.174	0.371	0.381	0.47	0.489	0.482	0.69	0.693	0.692	0.759	0.742	0.754	0.12	0.118	0.117	0.131	0.121	0.122	0.113	0.117	0.119	0.591	0.593	0.594	0.738
8	1.027	1.013	1.004	1.229	1.21	1.109	0.852	0.848	0.835	1.003	1.002	1.002	0.856	0.887	0.898	1.118	1.148	1.07	0.903	0.89	0.89	1.095	1.036	1.013	0.235	0.441	0.45	0.531	0.539	0.528	0.737	0.737	0.735	0.797	0.794	0.798	0.121	0.118	0.118	0.127	0.117	0.118	0.113	0.115	0.117	0.615	0.615	0.621	0.784
9	1.117	1.108	1.096	1.295	1.277	1.182	0.912	0.912	0.9	1.078	1.079	1.079	0.943	0.976	0.985	1.199	1.219	1.154	0.991	0.98	0.976	1.175	1.133	1.11	0.327	0.519	0.529	0.576	0.589	0.574	0.791	0.791	0.788	0.851	0.841	0.85	0.12	0.118	0.117	0.122	0.114	0.114	0.111	0.114	0.117	0.65	0.648	0.654	0.846
10	1.21	1.193	1.172	1.36	1.347	1.249	0.99	0.99	0.971	1.134	1.137	1.134	1.032	1.063	1.068	1.233	1.281	1.227	1.074	1.067	1.067	1.25	1.207	1.179	0.453	0.581	0.584	0.613	0.611	0.595	0.838	0.841	0.841	0.881	0.882	0.891	0.12	0.117	0.115	0.122	0.11	0.112	0.11	0.114	0.116	0.671	0.671	0.675	0.898
11	1.249	1.238	1.222	1.393	1.382	1.287	1.027	1.035	1.016	1.176	1.176	1.177	1.097	1.123	1.129	1.259	1.324	1.27	1.131	1.123	1.129	1.293	1.255	1.23	0.522	0.597	0.603	0.636	0.63	0.608	0.871	0.877	0.876	0.902	0.906	0.916	0.125	0.118	0.117	0.126	0.11	0.113	0.111	0.117	0.119	0.677	0.676	0.681	0.935
12	1.297	1.28	1.266	1.415	1.403	1.316	1.084	1.09	1.069	1.215	1.216	1.213	1.158	1.185	1.181	1.288	1.356	1.304	1.19	1.181	1.184	1.319	1.293	1.27	0.664	0.654	0.658	0.648	0.639	0.616	0.915	0.916	0.914	0.934	0.931	0.946	0.131	0.119	0.118	0.13	0.111	0.118	0.114	0.129	0.127	0.684	0.684	0.687	0.959
13	1.306	1.291	1.277	1.422	1.415	1.334	1.127	1.13	1.114	1.251	1.253	1.251	1.193	1.214	1.212	1.315	1.379	1.331	1.22	1.215	1.218	1.35	1.323	1.305	0.657	0.664	0.667	0.657	0.65	0.622	0.942	0.944	0.942	0.956	0.951	0.974	0.157	0.129	0.129	0.151	0.12	0.134	0.124	0.149	0.15	0.695	0.694	0.696	0.986
14	1.345	1.324	1.312	1.458	1.445	1.38	1.172	1.17	1.155	1.303	1.302	1.302	1.231	1.248	1.242	1.36	1.419	1.374	1.248	1.255	1.265	1.39	1.367	1.343	0.67	0.668	0.675	0.658	0.65	0.623	0.969	0.976	0.976	0.993	0.987	1.012	0.202	0.149	0.15	0.188	0.14	0.168	0.145	0.2	0.207	0.7	0.697	0.7	1.043
15	1.344	1.315	1.307	1.462	1.445	1.389	1.204	1.202	1.185	1.325	1.324	1.326	1.258	1.269	1.262	1.37	1.425	1.39	1.268	1.261	1.266	1.403	1.381	1.366	0.696	0.685	0.698	0.653	0.64	0.62	0.998	1.003	0.999	1.021	1.016	1.006	0.28	0.185	0.193	0.252	0.194	0.22	0.196	0.273	0.282	0.703	0.697	0.7	1.07
16	1.372	1.353	1.35	1.462	1.448	1.391	1.242	1.241	1.224	1.335	1.335	1.335	1.293	1.303	1.295	1.363	1.433	1.398	1.3	1.292	1.299	1.406	1.387	1.373	0.729	0.705	0.713	0.657	0.643	0.615	1.021	1.025	1.026	1.038	1.035	1.06	0.381	0.262	0.281	0.333	0.265	0.293	0.272	0.376	0.366	0.707	0.702	0.705	1.082
	dspeG (pBAD)	dzwf (pBAD)	dspeGdzwf (pBAD)	dspegdzwf(pZWF)	dspeG(pBAD)+spd3.2mM	dzwf(pBAD)+spd3.2mM	dspeGdzwf(pBAD)+spd3.2mM	dspeGdzwf(pZWF)+spd3.2mM
0	0.1075	0.108333	0.106333	0.105167	0.108667	0.110167	0.108111	0.110167			0.00344964	0.00631401	0.00823812	0.00601387	0.00454606	0.00435507	0.00938675	0.00534478
1	0.191	0.192833	0.183833	0.1765	0.115	0.163833	0.116	0.130333			0.0108628	0.00808497	0.00741395	0.00568331	0.00374166	0.00897589	0.0088176	0.00136626
2	0.408167	0.3685	0.379333	0.3635	0.125833	0.285333	0.126222	0.207167			0.0136002	0.00776531	0.0223666	0.00880341	0.00470815	0.0168958	0.00902466	0.0312245
3	0.577833	0.536167	0.547667	0.535833	0.1335	0.447167	0.131333	0.336167			0.0147975	0.028757	0.0567262	0.0310124	0.00833667	0.0105909	0.0115326	0.0602774
4	0.726167	0.654167	0.673667	0.661833	0.150667	0.562	0.130889	0.483167			0.0294443	0.0461451	0.0765236	0.0550687	0.00989276	0.0208998	0.0100056	0.0467522
5	0.826	0.728833	0.761	0.7465	0.1955	0.610833	0.125333	0.556167			0.0517996	0.0657097	0.101141	0.0703129	0.0317096	0.0285616	0.00955249	0.0563326
6	0.935	0.802667	0.839833	0.820833	0.2885	0.670167	0.123	0.611833			0.0588999	0.0699304	0.115997	0.0799135	0.0736553	0.0314669	0.00818535	0.0643099
7	1.03167	0.866333	0.920833	0.902667	0.3945	0.721667	0.119778	0.661			0.080654	0.0787367	0.125327	0.0841491	0.119701	0.0333387	0.00496935	0.0750227
8	1.09867	0.923667	0.996167	0.971167	0.454	0.766333	0.118222	0.697333			0.100921	0.0863589	0.130038	0.088443	0.115565	0.0328978	0.00396162	0.0881015
9	1.17917	0.993333	1.07933	1.06083	0.519	0.818667	0.116333	0.746167			0.0881395	0.0935813	0.124551	0.0886192	0.0981203	0.0316143	0.00342783	0.104683
10	1.25517	1.05933	1.15067	1.14067	0.572833	0.862333	0.115111	0.780667			0.0803528	0.0831857	0.107883	0.0813896	0.0601878	0.0247359	0.00416667	0.118819
11	1.29517	1.10117	1.20033	1.1935	0.599333	0.891333	0.117333	0.799667			0.0747407	0.0825625	0.0952211	0.0749019	0.0408885	0.0189279	0.00559017	0.133563
12	1.3295	1.14783	1.24533	1.2395	0.6465	0.926	0.121889	0.8175			0.0639273	0.0735375	0.0811361	0.0617503	0.017225	0.013069	0.00745729	0.145312
13	1.34083	1.18767	1.274	1.27183	0.652833	0.9515	0.138111	0.835333			0.0630981	0.0703183	0.077408	0.061062	0.0162409	0.0123572	0.0136606	0.153859
14	1.37733	1.234	1.31233	1.31133	0.657333	0.9855	0.172111	0.862833			0.0620505	0.0750866	0.0814289	0.062644	0.0190753	0.0155788	0.0272646	0.17973
15	1.377	1.261	1.329	1.32417	0.665333	1.00717	0.230556	0.878833			0.0660697	0.0704216	0.0744956	0.0659133	0.0323831	0.00936839	0.0410491	0.196034
16	1.396	1.28533	1.3475	1.34283	0.677	1.03417	0.314333	0.886			0.0482203	0.054782	0.0596783	0.0513631	0.0451309	0.0141904	0.0497443	0.198859
[truncated: 2 more columns]
