# Supplementary material for: Free spermidine evokes superoxide radicals that manifest toxicity
Source: eLife. 2022 Apr 13;11:e77704. doi: 10.7554/eLife.77704 (PMC9038194; doi:10.7554/eLife.77704)
Supplement: Figure 3—source data 3. [file elife-77704-fig3-data3.xlsx]

## Sheet: Sheet2
WT+pDAK1	380	540	1055	1935	2770		1	1.42105	2.77632	5.09211	7.28947
speG+pDAK1	888	237	125	26	9		1	0.266892	0.140766	0.0292793	0.0101351
speGzwf+pDAK1	1078	52	16	1	0		1	0.0482375	0.0148423	0.000927644	0
speGzwf+pZwf	408	390	180	920	540		1	0.955882	0.441176	2.2549	1.32353
WT+pDAK1	420	655	1230	1680	2350		1	1.55952	2.92857	4	5.59524
speG+pDAK1	955	235	160	20	18		1	0.246073	0.167539	0.0209424	0.0188482
speGzwf+pDAK1	815	31	2	4	0		1	0.0380368	0.00245399	0.00490798	0
speGzwf+pZwf	234	320	360	1110	632		1	1.36752	1.53846	4.74359	2.70085
WT+pDAK1	280	710	950	2030	3030		1	2.53571	3.39286	7.25	10.8214
speG+pDAK1	845	318	118	15	7		1	0.376331	0.139645	0.0177515	0.00828402
speGzwf+pDAK1	842	16	10	3	0		1	0.0190024	0.0118765	0.00356295	0
speGzwf+pZwf	281	503	252	625	420		1	1.79004	0.896797	2.2242	1.49466
WT+pDAK1	1	1	1		1.42105	1.55952	2.53571		2.77632	2.92857	3.39286		5.09211	4	7.25		7.28947	5.59524	10.8214
speG+pDAK1	1	1	1		0.266892	0.246073	0.376331		0.140766	0.167539	0.139645		0.0292793	0.0209424	0.0177515		0.0101351	0.0188482	0.00828402
speGzwf+pDAK1	1	1	1		0.0482375	0.0380368	0.0190024		0.0148423	0.00245399	0.0118765		0.000927644	0.00490798	0.00356295		0	0	0
speGzwf+pZwf	1	1	1		0.955882	1.36752	1.79004		0.441176	1.53846	0.896797		2.2549	4.74359	2.2242		1.32353	2.70085	1.49466
WT+pDAK1	1	0			1.83876	0.607535			3.03258	0.321161			5.44737	1.65387			7.90205	2.6664
speG+pDAK1	1	0			0.296432	0.0699733			0.149317	0.0157912			0.0226577	0.00595225			0.0124224	0.00564129
speGzwf+pDAK1	1	0			0.0350922	0.0148383			0.00972426	0.00646851			0.00313285	0.00202472			0	0
speGzwf+pZwf	1	0			1.37115	0.417088			0.958812	0.551265			3.07423	1.44579			1.83968	0.75069
WT+pDAK1	1	1.83876	3.03258	5.44737	7.90205		0	0.607535	0.321161	1.65387	2.6664
speG+pDAK1	1	0.296432	0.149317	0.0226577	0.0124224		0	0.0699733	0.0157912	0.00595225	0.00564129
speGzwf+pDAK1	1	0.0350922	0.00972426	0.00313285	0		0	0.0148383	0.00646851	0.00202472	0
speGzwf+pZwf	1	1.37115	0.958812	3.07423	1.83968		0	0.417088	0.551265	1.44579	0.75069

## Sheet: Sheet3
WT+pDAK1	1	1.83876	3.03258	5.44737	7.90205		0	0.607535	0.321161	1.65387	2.6664
speG+pDAK1	1	0.296432	0.149317	0.0226577	0.0124224		0	0.0699733	0.0157912	0.00595225	0.00564129
speGzwf+pDAK1	1	0.0350922	0.00972426	0.00313285	0		0	0.0148383	0.00646851	0.00202472	0
speGzwf+pZwf	1	1.37115	0.958812	3.07423	1.83968		0	0.417088	0.551265	1.44579	0.75069
											Unpaired t test results (Between speG and speGzwf) at 2 hours time point
											P value and statistical significance:
											The two-tailed P value equals 0.0002
											By conventional criteria, this difference is considered to be extremely statistically significant.
											Unpaired t test results (Between speG and speG zwf+pZwf) at 2 hours timepoint
											P value and statistical significance:
											The two-tailed P value equals 0.0001
											By conventional criteria, this difference is considered to be extremely statistically significant.
