# Supplementary material for: Free spermidine evokes superoxide radicals that manifest toxicity
Source: eLife. 2022 Apr 13;11:e77704. doi: 10.7554/eLife.77704 (PMC9038194; doi:10.7554/eLife.77704)
Supplement: Figure 3—source data 4. [file elife-77704-fig3-data4.xlsx]

## Sheet: Sheet2
	BW		0.285	0.288	0.138	0.364	0.43	0.178
	ΔspeG		0.168	0.229	0.133	0.229	0.331	0.133
	BW+ sp4.5mM		0.309	0.387	0.16	0.309	0.387	0.133
	ΔspeG+sp4.5mM		0.157	0.139	0.095	0.191	0.198	0.076
	BW		0.237	0.0857496		0.324	0.130675
	ΔspeG		0.176667	0.0485833		0.231	0.0990152
	BW+ sp4.5mM		0.285333	0.115336		0.276333	0.130113
	ΔspeG+sp4.5mM		0.130333	0.0318957		0.155	0.0685055
	BW	0.649	0.718	0.316		0.285	0.288	0.138		0.364	0.43	0.178
	ΔspeG	0.397	0.56	0.266		0.168	0.229	0.133		0.229	0.331	0.133
	BW+ sp4.5mM	0.618	0.774	0.293		0.309	0.387	0.16		0.309	0.387	0.133
	ΔspeG+sp4.5mM	0.348	0.337	0.171		0.157	0.139	0.095		0.191	0.198	0.076
	BW	1	1	1		0.439137	0.401114	0.436709		0.560863	0.598886	0.563291
	ΔspeG	0.61171	0.779944	0.841772		0.25886	0.318942	0.420886		0.352851	0.461003	0.420886
	BW+ sp4.5mM	0.952234	1.07799	0.927215		0.476117	0.538997	0.506329		0.476117	0.538997	0.420886
	ΔspeG+sp4.5mM	0.53621	0.469359	0.541139		0.241911	0.193593	0.300633		0.294299	0.275766	0.240506
	BW	1	0			0.425653	0.0212862			0.574347	0.0212862
	ΔspeG	0.744476	0.119061			0.332896	0.0819095			0.41158	0.0546734
	BW+ sp 4.5mM	0.985815	0.0808043			0.507148	0.031448			0.478667	0.0590968
	ΔspeG+sp 4.5mM	0.515569	0.0400949			0.245379	0.053604			0.27019	0.0273263
	Unpaired t test results (between NADPt of speG and speG+spd)
	P value and statistical significance:
	The two-tailed P value equals 0.0343
	By conventional criteria, this difference is considered to be statistically significant.
	Unpaired t test results (between NADPH of speG and speG+spd)
	P value and statistical significance:
	The two-tailed P value equals 0.0160
	By conventional criteria, this difference is considered to be statistically significant.

## Sheet: Sheet3
		NAD(TOTAL)			NAD+			NADH
BW		3.327	3.3	2.8	1.947	1.83	2.24	1.38	1.47	0.56
ΔspeG		3.6	4.1	1.946	2.934	3.422	1.606	0.666	0.678	0.34
BW+ sp4.5mM		3.23	4.35	1.928	2.207	3.203	1.469	1.023	1.147	0.459					ratio
ΔspeG+sp4.5mM		2.574	4.31	2.4	1.977	3.675	2.113	0.597	0.635	0.287					1.41087	1.2449	4		2.21859	1.54498
															4.40541	5.0472	4.72353		4.72538	0.3209
BW		1	1	1	0.585212	0.554545	0.8	0.414788	0.445455	0.2					2.15738	2.7925	3.20044		2.71677	0.525635
ΔspeG		1.08206	1.24242	0.695	0.881876	1.03697	0.573571	0.20018	0.205455	0.121429					3.31156	5.7874	7.36237		5.48711	2.04203
BW+ sp4.5mM		0.970845	1.31818	0.688571	0.66336	0.970606	0.524643	0.307484	0.347576	0.163929
ΔspeG+sp4.5mM		0.77367	1.30606	0.857143	0.594229	1.11364	0.754643	0.179441	0.192424	0.1025
BW		1	0		0.646586	0.133742		0.353414	0.133742
ΔspeG		1.00649	0.281426		0.830806	0.235883		0.175688	0.0470638
BW+ sp4.5mM		0.992533	0.315365		0.719536	0.228227		0.272996	0.096559
ΔspeG+sp4.5mM		0.978958	0.286337		0.820836	0.265955		0.158122	0.0486053
NAD/NADH ratio:
BW		1.82954		1.8
ΔspeG		4.72887		4.7
BW+ sp4.5mM		2.6357		2.6
ΔspeG+sp4.5mM		5.19117		5.2

## Sheet: Sheet4
		GSH+GSSG			GSSG
Sample(s)		1	2	3	1	2	3
BW		1.228	1.418	1.34	0.382	0.305	0.301
ΔspeG		1.656	1.629	1.66	0.584	0.34	0.192
BW+ sp4.5mM		1.332	1.327	1.328	0.277	0.238	0.22
ΔspeG+sp4.5mM		0.811	0.82	0.807	0.195	0.055	0.052
		GSH+GSSG			GSSG
Sample(s)		1	2	3	1	2	3
BW		1	1	1	0.311075	0.215092	0.224627
ΔspeG		1.34853	1.1488	1.23881	0.47557	0.239774	0.143284
BW+ sp4.5mM		1.08469	0.935825	0.991045	0.22557	0.167842	0.164179
ΔspeG+sp4.5mM		0.660423	0.578279	0.602239	0.158795	0.038787	0.038806
		GSH+GSSG			GSH			GSSG
Sample(s)		1	2	3	1	2	3	1	2	3
BW		1	1	1	0.688925	0.784908	0.775373	0.311075	0.215092	0.224627
ΔspeG		1.34853	1.1488	1.23881	0.872964	0.909027	1.09552	0.47557	0.239774	0.143284
BW+ sp4.5mM		1.08469	0.935825	0.991045	0.859121	0.767983	0.826866	0.22557	0.167842	0.164179
ΔspeG+sp4.5mM		0.660423	0.578279	0.602239	0.501629	0.539492	0.563433	0.158795	0.038787	0.038806
Sample(s)		GSH+GSSG			GSH			GSSG
BW		1	0		0.749736	0.0528787		0.250264	0.0528787
ΔspeG		1.24538	0.100029		0.959171	0.119452		0.286209	0.170941
BW+ sp4.5mM		1.00385	0.0752548		0.81799	0.0462125		0.185864	0.0344354
ΔspeG+sp4.5mM		0.613647	0.0422437		0.534851	0.0311624		0.0787959	0.069281
Unpaired t test results (between total of speG)
P value and statistical significance:
The two-tailed P value equals 0.0005
By conventional criteria, this difference is considered to be extremely statistically significant.
Unpaired t test results (between GSH of speG)
P value and statistical significance:
The two-tailed P value equals 0.0040
By conventional criteria, this difference is considered to be very statistically significant.
