# Supplementary material for: Free spermidine evokes superoxide radicals that manifest toxicity
Source: eLife. 2022 Apr 13;11:e77704. doi: 10.7554/eLife.77704 (PMC9038194; doi:10.7554/eLife.77704)
Supplement: Figure 3—source data 5. [file elife-77704-fig3-data5.xlsx]

## Sheet: Sheet1
ATP measurement data
Day1
	BW	dspeG	BW spd4.0mM		dspeG spd4.0mM
	253045	82984	107323		44045
	231163	77755	98302		39916
	221021	85033	99787		50550					100	32.7942	42.4126	17.406
										100	33.6364	42.525	17.2675
	BW	dspeG	BW spd4.0mM		dspeG spd4.0mM					100	38.4728	45.1482	22.8711
	100	32.7942	42.4126		17.406					100	41.7402	35.9662	13.8585
	100	33.6364	42.525		17.2675					100	50.8574	34.41	15.5434
	100	38.4728	45.1482		22.8711					100	46.1243	35.4492	17.9956
										100	40.6042	39.3185	17.4904
										0	7.08489	4.56383	3.04124
Day2
	BW	dspeG	BW spd4.0mM		dspeG spd4.0mM
	23675	9882	8515		3281
	22569	11478	7766		3508
	21583	9955	7651		3884
	BW	dspeG	BW spd4.0mM		dspeG spd4.0mM
	100	41.7402	35.9662		13.8585
	100	50.8574	34.41		15.5434
	100	46.1243	35.4492		17.9956
