# Supplementary material for: Free spermidine evokes superoxide radicals that manifest toxicity
Source: eLife. 2022 Apr 13;11:e77704. doi: 10.7554/eLife.77704 (PMC9038194; doi:10.7554/eLife.77704)
Supplement: Figure 4—source data 1. [file elife-77704-fig4-data1.xlsx]

## Sheet: Sheet1
			DAY1	DAY2	DAY3	DAY4
sample			MFI value					MFI (background substratced)
WT (background)			91	52	54	54
soxSgfp			251	153	164	149		160	101	110	95		1	1	1	1		1	0
soxsgfp+spd			225	119	100	95		134	67	46	41		0.8375	0.663366	0.418182	0.431579		0.587657	0.201027
soxsgfp+men			980	1086	1399	927		889	1034	1345	873		5.55625	10.2376	12.2273	9.18947		9.30266	2.79737
soxsgfp+spd+men			323	321	223	195		232	269	169	141		1.45	2.66337	1.53636	1.48421		1.78349	0.587661
soxSgfp	1	0
soxsgfp+spd	0.587657	0.201027
soxsgfp+men	9.30266	2.79737
soxsgfp+spd+men	1.78349	0.587661
soxSgfp	1							0
soxsgfp+spd		0.587657						0.201027
soxsgfp+men			9.30266					2.79737
soxsgfp+spd+men				1.78349				0.587661
								Unpaired t test results (None and MD)
								P value and statistical significance:
								The two-tailed P value equals 0.0010
								By conventional criteria, this difference is considered to be very statistically significant.
								Unpaired t test results (SPD and MD)
								P value and statistical significance:
								The two-tailed P value equals 0.0008
								By conventional criteria, this difference is considered to be extremely statistically significant.
								Unpaired t test results (MD and MD+SPD)
								P value and statistical significance:
								The two-tailed P value equals 0.0019
								By conventional criteria, this difference is considered to be very statistically significant.
