# Supplementary material for: Free spermidine evokes superoxide radicals that manifest toxicity
Source: eLife. 2022 Apr 13;11:e77704. doi: 10.7554/eLife.77704 (PMC9038194; doi:10.7554/eLife.77704)
Supplement: Figure 4—source data 14. [file elife-77704-fig4-data14.xlsx]

## Sheet: sodA
2018-10-24	Normalized			sodA				Mean	SD
3231.74	100			1	100	100	100	100	0
5008.81	154.988			2	154.988	239.7	136.884	177.191	54.8864
8537.75	264.184			3	264.184	238.184	143.634	215.334	63.4402
11048.3	341.87			4	341.87	282.087	155.835	259.931	94.9758
5097.02	157.718			5	157.718	125.437	87.9897	123.715	34.8958
6250.4	193.407			6	193.407	166.3	107.449	155.719	43.9447
25663.2	794.1
2018-10-25
2792.84	100
6694.45	239.7			Unpaired t test results (BW Wt+/- SPD)
6652.1	238.184			P value and statistical significance:
7878.23	282.087			The two-tailed P value equals 0.0434
3503.26	125.437			By conventional criteria, this difference is considered to be statistically significant.
4644.5	166.3
23504.2
2018-10-26
9248.4	100
12659.6	136.884
13283.9	143.634
14412.2	155.835
8137.64	87.9897
9937.35	107.449
29533.6	319.337

## Sheet: KatG
	Normalized values
	100	100	100		100	0
	95	98	90		94.3333	4.04145
	135	125	130		130	5
	57	51	39		49	9.16515
	Unpaired t test results (BW speG +/-SPD)
	P value and statistical significance:
	The two-tailed P value equals 0.0014
	By conventional criteria, this difference is considered to be very statistically significant.

## Sheet: ahpC
ahpC
1st nov 2018
717.406	100				100	100	100		100	0
943.134	131.464				131.46	100.933	108.355		113.583	15.9207
889.033	123.923				123.92	126.283	150.314		133.506	14.6045
7768.93	1082.92				1082.92	411.595	405.965		633.493	389.225
10363.2	1444.54				1445	1580.31	595.135		1512.65	534.033
7995.49	1114.5				1115	1868.6	1038.07		1340.56	458.913
21st nov 2018
629.82	100
635.698	100.933				Unpaired t test results (BW speG+/-SPD)
795.355	126.283				P value and statistical significance:
2592.3	411.595				The two-tailed P value equals 0.0239
9953.1	1580.31				By conventional criteria, this difference is considered to be statistically significant.
11768.8	1868.6
9626.91	1528.52
24th nov 2018
830.82	100
900.234	108.355
1248.84	150.314
3372.84	405.965
3620.26	435.745
4944.5	595.135
8624.5	1038.07
