# Supplementary material for: Free spermidine evokes superoxide radicals that manifest toxicity
Source: eLife. 2022 Apr 13;11:e77704. doi: 10.7554/eLife.77704 (PMC9038194; doi:10.7554/eLife.77704)
Supplement: Figure 5—source data 1. [file elife-77704-fig5-data1.xlsx]

## Sheet: Sheet1
	A1	A2	A3		A1	A2	A3		A1	A2	A3		Ave	SD
BW	0.2148	0.2008	0.2584		0.1813	0.1634	0.2212		1	1	1		1	0
BW+SPD	0.1836	0.1996	0.2254		0.1501	0.1622	0.1882		0.82791	0.992656	0.850814		0.89046	0.0892424
dspeG	0.1828	0.204	0.235		0.1493	0.1666	0.1978		0.823497	1.01958	0.894213		0.912431	0.0993048
dspeG+SPD	0.105	0.1134	0.0908		0.0715	0.076	0.0536		0.394374	0.465116	0.242315		0.367268	0.113847
dspeG+SPD+Fe2+	0.1992	0.1864	0.1756		0.1657	0.149	0.1384		0.913955	0.911873	0.625678		0.817169	0.165839
blank	0.0335	0.0374	0.0372		0	0	0
	Ave	SD
BW	1	0		Unpaired t test results (BW dspeG and dspeG+SPD)
BW+SPD	0.89046	0.0892424		P value and statistical significance:
dspeG	0.912431	0.0993048		The two-tailed P value equals 0.0033
dspeG+SPD	0.367268	0.113847		By conventional criteria, this difference is considered to be very statistically significant.
dspeG+SPD+Fe2+	0.817169	0.165839
				Unpaired t test results (BW dspeG+SPD and dspeG+SPD+Fe)
				P value and statistical significance:
				The two-tailed P value equals 0.0180
				By conventional criteria, this difference is considered to be statistically significant.
