# Supplementary material for: Free spermidine evokes superoxide radicals that manifest toxicity
Source: eLife. 2022 Apr 13;11:e77704. doi: 10.7554/eLife.77704 (PMC9038194; doi:10.7554/eLife.77704)
Supplement: Figure 5—source data 2. [file elife-77704-fig5-data2.xlsx]

## Sheet: Sheet1
Metals per kg of cell pellet
	Fe
BW	38.4503	29.6547	28.2868
speG	26.2759	23.0572	28.1197
BW+SPD	24.4727	23.4409	20.1165
speG+SPD	11.9518	12.3181	15.2546
	Fe		SD
BW	32.1306		5.51563
speG	25.8176		2.56216
BW+SPD	22.6767		2.27645
speG+SPD	13.1748		1.8104
