# Supplementary material for: Free spermidine evokes superoxide radicals that manifest toxicity
Source: eLife. 2022 Apr 13;11:e77704. doi: 10.7554/eLife.77704 (PMC9038194; doi:10.7554/eLife.77704)
Supplement: Figure 5—source data 3. [file elife-77704-fig5-data3.xlsx]

## Sheet: Sheet1
Metals per kg of cell pellet
	Mn
BW	1.65515	1.49519	1.43389
speG	0.647189	0.552268	0.647189
BW+SPD	0.66502	0.701825	0.679612
speG+SPD	0.754853	0.71066	0.855397
	Mn		SD
BW	1.52808		0.114234
speG	0.615549		0.0548027
BW+SPD	0.682152		0.0185334
speG+SPD	0.773637		0.0741744
