# Supplementary material for: Free spermidine evokes superoxide radicals that manifest toxicity
Source: eLife. 2022 Apr 13;11:e77704. doi: 10.7554/eLife.77704 (PMC9038194; doi:10.7554/eLife.77704)
Supplement: Figure 6—source data 1. [file elife-77704-fig6-data1.xlsx]

## Sheet: Sheet1
Standard curve					Aerobic condition				Anaerobic condition
Fe2+ Only					Fe2+ + SPD 100uM				Fe2+ + SPD 100uM					Fe2+	Spd+Fe2+aerobic	Spd+Fe2+ anaerobic
Fe2+ conc.	ExpI	ExpII	ExpIII		ExpI	ExpII	ExpIII		ExpI	ExpII	ExpIII			Mean	Mean	Mean			SD	SD	SD
0	0	0	0		0.0193	0.0082	0.0035							0	0.0103333				0	0.00811316
25	0.1888	0.174	0.1792		-0.0077	0.004	-0.0053							0.180667	-0.003				0.00750822	0.00617981
50	0.366	0.362	0.3581		-0.0015	0.0035	0.00496							0.362033	0.00232				0.00395011	0.0033878
75					0.0096	0.0123	0.0117								0.0112					0.00141774
100	0.7352	0.7227	0.729		0.0299	0.0238	0.0211		0.6259	0.6022	0.6301			0.728967	0.0249333	0.6194			0.00625007	0.00450814	0.0150429
125					0.0267	0.0278	0.0281								0.0275333					0.000737111
150	1.0547	1.0728	1.0693		0.1996	0.2051	0.0252							1.0656	0.1433				0.00960052	0.102315
200	1.4702	1.4543	1.468		0.5759	0.5689	0.5622		1.52	1.245	1.432			1.46417	0.569	1.399			0.0086153	0.00685055	0.140439
250	1.7537	1.7548	1.762		0.7923	0.7901	0.7888							1.75683	0.7904				0.00450814	0.00176918
300	2.1701	2.1582	2.19		1.0769	1.0712	1.06946		1.935	2.097	2.132			2.17277	1.07252	2.05467			0.0160668	0.00389168	0.105102
350	2.4222	2.4143	2.4195		1.4532	1.4623	1.498							2.41867	1.47117				0.00401539	0.0236796
	Fe2+	Spd+Fe2+aerobic	Spd+Fe2+ anaerobic
Fe2+ conc.	Mean	Mean	Mean
0	0	0.0103333
25	0.180667	-0.003
50	0.362033	0.00232
75		0.0112
100	0.728967	0.0249333	0.6194
125		0.0275333
150	1.0656	0.1433
200	1.46417	0.569	1.399
250	1.75683	0.7904
300	2.17277	1.07252	2.0546
350	2.41867	1.47117
