# Supplementary material for: Free spermidine evokes superoxide radicals that manifest toxicity
Source: eLife. 2022 Apr 13;11:e77704. doi: 10.7554/eLife.77704 (PMC9038194; doi:10.7554/eLife.77704)
Supplement: Figure 6—source data 2. [file elife-77704-fig6-data2.xlsx]

## Sheet: Sheet1
	NBT assay(Invitro)
	Experiment1					Control 1: 400uM Fe2+ O.D. @575nm= 0.005 in 10 min inucbation
	spermidine concentration=100 micromolar			μM
	Fe2+ Concentration(μM)			0.D@575nM
	0			0	0	0		0	0
	25			0.132	0.138	0.123		0.131	0.00754983
	50			0.276	0.298	0.302		0.292	0.014
	100			0.594	0.655	0.63		0.626333	0.0306649
	125			0.671	0.785	0.716		0.724	0.0574195
	150			0.682	0.639	0.717		0.679333	0.0390683
	300			0.7	0.811	0.685		0.732	0.0688259
	400			0.698	0.629	0.682		0.669667	0.0361156
	0	0	0								Unpaired t test results (between 0 and 100 uM)
	25	0.131	0.00754983								P value and statistical significance:
	50	0.292	0.014								The two-tailed P value is less than 0.0001
	100	0.626333	0.0306649								By conventional criteria, this difference is considered to be extremely statistically significant.
	125	0.724	0.0574195
	150	0.679333	0.0390683
	300	0.732	0.0688259
	400	0.669667	0.0361156
