# Supplementary material for: Free spermidine evokes superoxide radicals that manifest toxicity
Source: eLife. 2022 Apr 13;11:e77704. doi: 10.7554/eLife.77704 (PMC9038194; doi:10.7554/eLife.77704)
Supplement: Figure 6—source data 3. [file elife-77704-fig6-data3.xlsx]

## Sheet: Sheet1
	Set 1							Set 2							Set 3
Time	Fe2+200uM	Fe+DNA 1ug	Fe+DNA+10uMSPD	Fe+DNA+50uMSPD	Fe+DNA+100uMSPD	Fe+DNA+200uMSPD		Fe2+200uM	Fe+DNA 1ug	Fe+DNA+10uMSPD	Fe+DNA+50uMSPD	Fe+DNA+100uMSPD	Fe+DNA+200uMSPD		Fe2+200uM	Fe+DNA 1ug	Fe+DNA+10uMSPD	Fe+DNA+50uMSPD	Fe+DNA+100uMSPD	Fe+DNA+200uMSPD
0	0.612	0.65	0.638	0.694	0.581	0.675		0.634	0.643	0.621	0.699	0.596	0.655		0.615	0.638	0.644	0.674	0.575	0.668
30	0.598	0.636	0.636	0.705	0.45	0.343		0.596	0.622	0.633	0.714	0.461	0.335		0.578	0.64	0.631	0.716	0.447	0.33
60	0.58	0.617	0.626	0.677	0.408	0.227		0.572	0.611	0.621	0.666	0.416	0.223		0.587	0.609	0.629	0.658	0.401	0.217
90	0.577	0.584	0.587	0.636	0.348	0.174		0.589	0.581	0.582	0.645	0.337	0.182		0.581	0.576	0.583	0.633	0.341	0.169
120	0.505	0.561	0.604	0.609	0.31	0.154		0.51	0.566	0.611	0.615	0.319	0.149		0.501	0.562	0.613	0.615	0.309	0.151
180	0.354	0.511	0.603	0.481	0.23	0.13		0.35	0.514	0.601	0.479	0.235	0.135		0.359	0.521	0.609	0.469	0.228	0.133
240	0.149	0.509	0.603	0.295	0.193	0.126		0.141	0.517	0.608	0.298	0.188	0.125		0.151	0.518	0.61	0.291	0.19	0.129
300	0.094	0.417	0.609	0.175	0.177	0.126		0.089	0.411	0.608	0.178	0.171	0.124		0.091	0.415	0.613	0.17	0.172	0.122
360	0.068	0.339	0.596	0.129	0.165	0.122		0.061	0.334	0.586	0.135	0.161	0.125		0.065	0.321	0.584	0.133	0.169	0.121
Normalized
Time
0	1	1	1	1	1	1		1	1	1	1	1	1		1	1	1	1	1	1
30	0.977124	0.978462	0.996865	1.01585	0.774527	0.508148		0.940063	0.967341	1.01932	1.02146	0.77349	0.51145		0.939837	1.00313	0.979814	1.06231	0.777391	0.494012
60	0.947712	0.949231	0.981191	0.975504	0.702238	0.336296		0.902208	0.950233	1	0.95279	0.697987	0.340458		0.954472	0.954545	0.976708	0.976261	0.697391	0.32485
90	0.94281	0.898462	0.920063	0.916427	0.598967	0.257778		0.929022	0.903577	0.937198	0.922747	0.565436	0.277863		0.944715	0.902821	0.90528	0.939169	0.593043	0.252994
120	0.825163	0.863077	0.946708	0.877522	0.533563	0.228148		0.804416	0.880249	0.983897	0.879828	0.535235	0.227481		0.814634	0.880878	0.951863	0.912463	0.537391	0.226048
180	0.578431	0.786154	0.945141	0.693084	0.395869	0.192593		0.55205	0.799378	0.967794	0.685265	0.394295	0.206107		0.58374	0.816614	0.945652	0.695846	0.396522	0.199102
240	0.243464	0.783077	0.945141	0.425072	0.332186	0.186667		0.222397	0.804044	0.979066	0.426323	0.315436	0.19084		0.245528	0.811912	0.947205	0.431751	0.330435	0.193114
300	0.153595	0.641538	0.954545	0.252161	0.304647	0.186667		0.140379	0.639191	0.979066	0.254649	0.286913	0.189313		0.147967	0.65047	0.951863	0.252226	0.29913	0.182635
360	0.111111	0.521538	0.934169	0.185879	0.283993	0.180741		0.0962145	0.51944	0.943639	0.193133	0.270134	0.19084		0.105691	0.503135	0.906832	0.197329	0.293913	0.181138
	Fe2+200uM	Fe+DNA 1ug	Fe+DNA+10uMSPD	Fe+DNA+50uMSPD	Fe+DNA+100uMSPD	Fe+DNA+200uMSPD
Time	Mean	Mean	Mean	Mean	Mean	Mean		SD	SD	SD	SD	SD	SD
0	1	1	1	1	1	1		0	0	0	0	0	0
30	0.952342	0.982979	0.998668	1.03321	0.775136	0.504537		0.0214627	0.0183197	0.0198166	0.0253626	0.00202079	0.00926314
60	0.934797	0.951337	0.985966	0.968185	0.699205	0.333868		0.0284247	0.00282388	0.0123584	0.0133381	0.00264294	0.0080822
90	0.938849	0.90162	0.920847	0.926114	0.585816	0.262878		0.00856378	0.00276123	0.0159737	0.0117393	0.0178959	0.0131955
120	0.814738	0.874734	0.960823	0.889938	0.535396	0.227226		0.0103739	0.0101007	0.0201482	0.0195415	0.00191934	0.00107314
180	0.571407	0.800715	0.952862	0.691398	0.395562	0.199267		0.0169723	0.0152743	0.0129336	0.00548821	0.00114455	0.00675865
240	0.23713	0.799678	0.957137	0.427715	0.326019	0.190207		0.0128004	0.0149052	0.0190188	0.0035503	0.00920664	0.00326983
300	0.147314	0.643733	0.961825	0.253012	0.296897	0.186205		0.00663233	0.00595119	0.0149913	0.00141836	0.00907575	0.003363
360	0.104339	0.514704	0.928214	0.192114	0.28268	0.184239		0.00753979	0.0100744	0.0191126	0.00579285	0.0119437	0.00571948
Time	Fe2+200uM	Fe+DNA 1ug	Fe+DNA+10uMSPD	Fe+DNA+50uMSPD	Fe+DNA+100uMSPD	Fe+DNA+200uMSPD
0	1	1	1	1	1	1
30	0.952342	0.982979	0.998668	1.03321	0.775136	0.504537
60	0.934797	0.951337	0.985966	0.968185	0.699205	0.333868
90	0.938849	0.90162	0.920847	0.926114	0.585816	0.262878
120	0.814738	0.874734	0.960823	0.889938	0.535396	0.227226
180	0.571407	0.800715	0.952862	0.691398	0.395562	0.199267
240	0.23713	0.799678	0.957137	0.427715	0.326019	0.190207
300	0.147314	0.643733	0.961825	0.253012	0.296897	0.186205
360	0.104339	0.514704	0.928214	0.192114	0.28268	0.184239
