# Supplementary material for: Free spermidine evokes superoxide radicals that manifest toxicity
Source: eLife. 2022 Apr 13;11:e77704. doi: 10.7554/eLife.77704 (PMC9038194; doi:10.7554/eLife.77704)
Supplement: Supplementary file 1. [file elife-77704-supp1.xlsx]

## Sheet: Sheet 1
Supplementary file 1. Microarray data representing upregulated (green) and downregulated (red) genes
Category	Gene name	Accession #F	Function	Fold Change
	dinG	b0799	ATP-dependent DNA helicase	3.95113
	dnaG	b3066	DNA primase	2.05897
I	dnaX	b0470	DNA polymerase III/DNA elongation factor III, tau and gamma subunits	3.04534
	rpoA	b3295	RNA polymerase, alpha subunit	5.68044
Replication and	rpoZ	b3649	RNA polymerase, omega subunit	2.10632
Transcription	nusB	b0416	transcription antitermination protein	2.33161
associated	nusG	b3982	transcription termination factor	3.53515
genes	rho	b3783	transcription termination factor	2.31319
	iscA	b2528	FeS cluster assembly protein	10.4221
II	iscR	b2531	isc operon transcriptional repressor; suf operon transcriptional activator; oxidative stress- and iron starvation-inducible; autorepressor	2.60701
	iscS	b2530	cysteine desulfurase (tRNA sulfurtransferase), PLP-dependent	2.74163
Iron	iscU	b2529	iron-sulfur cluster assembly scaffold protein	4.34153
Homeostasis,	iscX	b2524	Iron binding protein associated with IscS; putative molecular adaptor of IscS function	5.17706
ROS,	hscA	b2526	DnaK-like molecular chaperone specific for IscU	4.01669
Multidrug	hscB	b2527	HscA co-chaperone, J domain-containing protein Hsc56; IscU-specific chaperone HscAB	4.00285
resistance and	fdx	b2525	[2Fe-2S] ferredoxin	3.27489
sugar	rsxB	b1628	SoxR iron-sulfur cluster reduction factor component; putative iron-sulfur protein	4.14944
metabolism-	rsxC	b1629	SoxR iron-sulfur cluster reduction factor component; putative membrane-associated NADH oxidoreductase of electron transport complex	2.25586
associated	marA	b1531	multiple antibiotic resistance transcriptional regulator	19.5348
genes	marB	b1532	mar operon regulator, periplasmic	29.8379
	marR	b1530	transcriptional repressor of multiple antibiotic resistance	2.96439
	fldA	b0684	flavodoxin 1	2.61824
	uof	b4637	ryhB-regulated fur leader peptide	3.59428
	fur	b0683	ferric iron uptake regulon transcriptional repressor; autorepressor	2.05192
	ptsG	b1101	fused glucose-specific PTS enzymes: IIB component/IIC component	2.14685
	ribA	b1277	GTP cyclohydrolase II	1.95547
	ftnA	b1905	ferritin iron storage protein (cytoplasmic)	0.51528
	mdtI	b1599	multidrug efflux system transporter	3.20378
	mdtJ	b1600	multidrug efflux system transporter	3.47121
	katE	b1732	catalase HPII, heme d-containing	0.409093
	katG	b3942	catalase-peroxidase HPI, heme b-containing	0.223987
	rimI	b4373	ribosomal-protein-S18-alanine N-acetyltransferase	2.04822
	rimM	b2608	16S rRNA processing protein	8.01133
III	rimO	b0835	ribosomal protein S12 methylthiotransferase; radical SAM superfamily	2.46225
	rimP	b3170	ribosome maturation factor for 30S subunits	3.34924
Ribosomal	rlmA	b1822	23S rRNA m(1)G745 methyltransferase, SAM-dependent	4.97191
and	rlmH	b0636	23S rRNA m(3)Psi1915 pseudouridine methyltransferase, SAM-dependent	2.34036
ribosome	rlmL	b0948	fused 23S rRNA m(2)G2445 and m(7)G2069 methyltransferase, SAM-dependent	2.09461
biogenesis-	rluB	b1269	23S rRNA pseudouridine(2605) synthase	2.56273
associated	rplA	b3984	50S ribosomal subunit protein L1	7.98603
genes	rplB	b3317	50S ribosomal subunit protein L2	7.28517
	rplC	b3320	50S ribosomal subunit protein L3	7.50404
	rplD	b3319	50S ribosomal subunit protein L4	7.41095
	rplE	b3308	50S ribosomal subunit protein L5	3.87746
	rplF	b3305	50S ribosomal subunit protein L6	4.55513
	rplI	b4203	50S ribosomal subunit protein L9	5.42387
	rplJ	b3985	50S ribosomal subunit protein L10	4.86397
	rplK	b3983	50S ribosomal subunit protein L11	5.40776
	rplL	b3986	50S ribosomal subunit protein L7/L12	6.05066
	rplM	b3231	50S ribosomal subunit protein L13	2.77822
	rplN	b3310	50S ribosomal subunit protein L14	2.19186
	rplO	b3301	50S ribosomal subunit protein L15	3.71811
	rplP	b3313	50S ribosomal subunit protein L16	5.92043
	rplQ	b3294	50S ribosomal subunit protein L17	2.97217
	rplR	b3304	50S ribosomal subunit protein L18	4.35411
	rplS	b2606	50S ribosomal subunit protein L19	6.14858
	rplU	b3186	50S ribosomal subunit protein L21	3.11625
	rplV	b3315	50S ribosomal subunit protein L22	5.40932
	rplW	b3318	50S ribosomal subunit protein L23	10.9803
	rplX	b3309	50S ribosomal subunit protein L24	3.72153
	rplY	b2185	50S ribosomal subunit protein L25	5.65242
	rpmA	b3185	50S ribosomal subunit protein L27	5.34942
	rpmB	b3637	50S ribosomal subunit protein L28	2.81038
	rpmC	b3312	50S ribosomal subunit protein L29	7.54131
	rpmD	b3302	50S ribosomal subunit protein L30	3.24925
	rpmF	b1089	50S ribosomal subunit protein L32	2.19649
	rpmG	b3636	50S ribosomal subunit protein L33	3.34338
	rpmH	b3703	50S ribosomal subunit protein L34	2.82973
	rpmI	b1717	50S ribosomal subunit protein L35	2.41728
	rpmJ	b3299	50S ribosomal subunit protein L36	6.75481
	rpsA	b0911	30S ribosomal subunit protein S1	7.509
	rpsB	b0169	30S ribosomal subunit protein S2	5.08408
	rpsC	b3314	30S ribosomal subunit protein S3	5.90831
	rpsD	b3296	30S ribosomal subunit protein S4	6.29469
	rpsE	b3303	30S ribosomal subunit protein S5	4.14946
	rpsF	b4200	30S ribosomal subunit protein S6	5.44537
	rpsG	b3341	30S ribosomal subunit protein S7	4.70514
	rpsH	b3306	30S ribosomal subunit protein S8	5.03928
	rpsI	b3230	30S ribosomal subunit protein S9	2.44727
	rpsJ	b3321	30S ribosomal subunit protein S10	7.3196
	rpsK	b3297	30S ribosomal subunit protein S11	6.60296
	rpsM	b3298	30S ribosomal subunit protein S13	5.01493
	rpsN	b3307	30S ribosomal subunit protein S14	4.9962
	rpsQ	b3311	30S ribosomal subunit protein S17	7.24087
	rpsR	b4202	30S ribosomal subunit protein S18	8.4507
	rpsS	b3316	30S ribosomal subunit protein S19	10.4146
	rpsU	b3065	30S ribosomal subunit protein S21	6.67204
	rsmH	b0082	16S rRNA m(4)C1402 methyltransferase, SAM-dependent	2.14325
	tsf	b0170	translation elongation factor EF-Ts	3.70088
	tufB	b3980	translation elongation factor EF-Tu 2	2.04539
IV	ynfG	b1589	oxidoreductase, Fe-S subunit	0.231242
Oxidoreductase	ynfF	b1588	S- and N-oxide reductase, A subunit, periplasmic	0.273672
and ATP	cydA	b0733	cytochrome d terminal oxidase, subunit I	0.348935
synthesis	cydB	b0734	cytochrome d terminal oxidase, subunit II	0.315787
related genes	atpI	b3739	ATP synthase, membrane-bound accessory factor	2.06546
V	fabD	b1092	malonyl-CoA-[acyl-carrier-protein] transacylase	3.881
Fatty acid	fabF	b1095	3-oxoacyl-[acyl-carrier-protein] synthase II	3.49672
metabolism-	fabG	b1093	3-oxoacyl-[acyl-carrier-protein] reductase	2.16852
related	fabH	b1091	3-oxoacyl-[acyl-carrier-protein] synthase III	2.30511
genes	fabZ	b0180	(3R)-hydroxymyristol acyl carrier protein dehydratase	2.73663
	flgC	b1074	flagellar component of cell-proximal portion of basal-body rod	0.381134
	flgD	b1075	flagellar hook assembly protein	0.383728
VI	flgE	b1076	flagellar hook protein	0.297451
	flgF	b1077	flagellar component of cell-proximal portion of basal-body rod	0.466199
Flagellar	flgK	b1082	flagellar hook-filament junction protein 1	0.357956
biogenesis-	flgM	b1071	anti-sigma factor for FliA (sigma 28)	0.339067
related	flgN	b1070	export chaperone for FlgK and FlgL	0.362659
genes	fliA	b1922	RNA polymerase, sigma 28 (sigma F) factor	0.416832
	fliC	b1923	flagellar filament structural protein (flagellin)	0.051605
	fliD	b1924	flagellar filament capping protein	0.186779
	fliS	b1925	flagellar protein potentiates polymerization	0.322396
	fliT	b1926	putative flagellar synthesis and assembly chaperone	0.146835
	fliZ	b1921	RpoS antagonist; putative regulator of FliA activity	0.408527
	fimA	b4314	major type 1 subunit fimbrin (pilin)	0.391955
	motB	b1889	protein that enables flagellar motor rotation	0.267379
	gadA	b3517	glutamate decarboxylase A, PLP-dependent	0.130532
	gadB	b1493	glutamate decarboxylase B, PLP-dependent	0.0690789
	gadC	b1492	glutamate:gamma-aminobutyric acid antiporter	0.235349
	gadE	b3512	gad regulon transcriptional activator	0.190471
VII	hdeA	b3510	stress response protein acid-resistance protein	0.0225021
	hdeB	b3509	acid-resistance protein	0.00950182
Acid-resistance	groL	b4143	Cpn60 chaperonin GroEL, large subunit of GroESL	0.180317
and	groS	b4142	Cpn10 chaperonin GroES, small subunit of GroESL	0.257819
chaperone	dnaK	b0014	chaperone Hsp70, with co-chaperone DnaJ	0.215335
genes	tig	b0436	peptidyl-prolyl cis/trans isomerase (trigger factor)	2.0042
	clpB	b2592	protein disaggregation chaperone	0.285676
	ftsH	b3178	protease, ATP-dependent zinc-metallo	3.00608
	elaD	b2269	protease, capable of cleaving an AMC-ubiquitin model substrate	0.465276
	ibpA	b3687	heat shock chaperone	0.315145
	ibpB	b3686	heat shock chaperone	0.48396
	uspA	b3495	universal stress global response regulator	0.164948
	uspB	b3494	universal stress (ethanol tolerance) protein B	0.521398
	hyaA	b0972	hydrogenase 1, small subunit	0.479889
	hybA	b2996	hydrogenase 2 4Fe-4S ferredoxin-type component	0.204743
VIII	hybB	b2995	putative hydrogenase 2 cytochrome b type component	0.465922
	hybC	b2994	hydrogenase 2, large subunit	0.361311
Hydrogenase	hybD	b2993	maturation protease for hydrogenase 2	0.37802
and nitrogen	hybE	b2992	hydrogenase 2-specific chaperone	0.411009
metabolizing	hybF	b2991	protein involved with the maturation of hydrogenases 1 and 2	0.483898
genes	hybO	b2997	hydrogenase 2, small subunit	0.240223
	nrfA	b4070	nitrite reductase, formate-dependent, cytochrome	0.0885554
	nrfB	b4071	nitrite reductase, formate-dependent, penta-heme cytochrome c	0.316592
	nrfC	b4072	formate-dependent nitrite reductase, 4Fe4S subunit	0.284902
	nrfD	b4073	formate-dependent nitrite reductase, membrane subunit	0.462172
	dmsA	b0894	dimethyl sulfoxide reductase, anaerobic, subunit A	0.226527
	dmsB	b0895	dimethyl sulfoxide reductase, anaerobic, subunit B	0.154133
	aroB	b3389	3-dehydroquinate synthase	2.26121
IX	aroK	b3390	shikimate kinase I	2.04244
	aroM	b0390	AroM family protein	4.42282
Amino	pheA	b2599	chorismate mutase and prephenate dehydratase, P-protein	0.360739
acid	tnaA	b3708	tryptophanase/L-cysteine desulfhydrase, PLP-dependent	0.102624
metabolizing	tnaB	b3709	tryptophan transporter of low affinity	0.144203
genes	tnaC	b3707	tryptophanase leader peptide	0.213141
	cadA	b4131	lysine decarboxylase, acid-inducible	0.26704
	cadB	b4132	putative lysine/cadaverine transporter	0.444476
