# Supplementary material for: Free spermidine evokes superoxide radicals that manifest toxicity
Source: eLife. 2022 Apr 13;11:e77704. doi: 10.7554/eLife.77704 (PMC9038194; doi:10.7554/eLife.77704)
Supplement: Supplementary file 2. [file elife-77704-supp2.xlsx]

## Sheet: Sheet1
	Supplementary file 2. List of Fis and IHF regulated genes that were upregulated (green) and downregulation (red).
gadB	Gene name	Accession #F	Function	Fold Change	Regulators
nrfA	gadB	b1493	glutamate decarboxylase B, PLP-dependent	0.0690789	Fis regulated
gadA	nrfA	b4070	nitrite reductase, formate-dependent, cytochrome	0.0885554	Fis regulated
ansB	gadA	b3517	glutamate decarboxylase A, PLP-dependent	0.130532	Fis regulated
dmsB	ansB	b2957	periplasmic L-asparaginase 2	0.14642	Fis regulated
osmY	dmsB	b0895	dimethyl sulfoxide reductase, anaerobic, subunit B	0.154133	Fis/IHF regulated
ompC	osmY	b4376	periplasmic protein	0.191358	Fis regulated
katG	ompC	b2215	outer membrane porin protein C	0.20142	IHF regulated
dmsA	katG	b3942	catalase-peroxidase HPI, heme b-containing	0.223987	Fis regulated
fumB	dmsA	b0894	dimethyl sulfoxide reductase, anaerobic, subunit A	0.226527	Fis/IHF regulated
gadC	fumB	b4122	anaerobic class I fumarate hydratase (fumarase B)	0.226646	Fis regulated
nrfC	gadC	b1492	glutamate:gamma-aminobutyric acid antiporter	0.235349	Fis regulated
nrfB	nrfC	b4072	formate-dependent nitrite reductase, 4Fe4S subunit	0.284902	Fis regulated
acs	nrfB	b4071	nitrite reductase, formate-dependent, penta-heme cytochrome c	0.316592	Fis regulated
fliZ	acs	b4069	acetyl-CoA synthetase	0.402723	Fis regulated
katE	fliZ	b1921	RpoS antagonist; putative regulator of FliA activity	0.408527	IHF regulated
mglA	katE	b1732	catalase HPII, heme d-containing	0.409093	Fis regulated
fliA	mglA	b2149	fused methyl-galactoside transporter subunits of ABC superfamily: ATP-binding components	0.413486	Fis regulated
nrfD	fliA	b1922	RNA polymerase, sigma 28 (sigma F) factor	0.416832	IHF regulated
hybB	nrfD	b4073	formate-dependent nitrite reductase, membrane subunit	0.462172	Fis regulated
hyaA	hybB	b2995	putative hydrogenase 2 cytochrome b type component	0.465922	Fis regulated
uspB	hyaA	b0972	hydrogenase 1, small subunit	0.479889	Fis regulated
dps	uspB	b3494	universal stress (ethanol tolerance) protein B	0.521398	IHF regulated
msrA	dps	b0812	Fe-binding and storage protein; stress-inducible DNA-binding protetin	0.542405	Fis regulated
pflB	msrA	b4219	methionine sulfoxide reductase A	0.548398	Fis regulated
aldB	pflB	b0903	formate C-acetyltransferase 1, anaerobic; pyruvate formate-lyase 1	0.552198	Fis regulated
hyaD	aldB	b3588	aldehyde dehydrogenase B	0.554435	Fis regulated
actP	hyaD	b0975	hydrogenase 1 maturation protease	0.583348	Fis regulated
rnpB	actP	b4067	acetate transporter	0.585936	Fis regulated
acnB	rnpB	b3123	-	0.59197	Fis regulated
nanK	acnB	b0118	bifunctional aconitate hydratase 2/2-methylisocitrate dehydratase	0.622308	Fis regulated
deoA	nanK	b3222	N-acetylmannosamine kinase	0.624725	Fis regulated
deoD	deoA	b4382	thymidine phosphorylase	0.626972	Fis regulated
osmE	deoD	b4384	purine-nucleoside phosphorylase	0.631288	Fis regulated
hyaC	osmE	b1739	osmotically-inducible lipoprotein	0.645105	Fis/IHF regulated
norW	hyaC	b0974	hydrogenase 1, b-type cytochrome subunit	0.647886	Fis regulated
dmsC	norW	b2711	NADH:flavorubredoxin oxidoreductase	0.648068	IHF regulated
yjcH	dmsC	b0896	dimethyl sulfoxide reductase, anaerobic, subunit C	0.648629	Fis/IHF regulated
gadX	yjcH	b4068	DUF485 family inner membrane protein	0.652255	Fis regulated
	gadX	b3516	acid resistance regulon transcriptional activator; autoactivator	0.658769	Fis regulated
marB
marA	marB	b1532	mar operon regulator, periplasmic	29.8379	Fis regulated
marR	marA	b1531	multiple antibiotic resistance transcriptional regulator	19.5348	Fis regulated
proV	marR	b1530	transcriptional repressor of multiple antibiotic resistance	2.96439	Fis regulated
rimP	proV	b2677	glycine betaine transporter subunit	3.71055	IHF regulated
ompF	rimP	b3170	ribosome maturation factor for 30S subunits	3.34924	Fis regulated
mazF	ompF	b0929	outer membrane porin 1a (Ia;b;F)	2.78211	IHF regulated
fnr	mazF	b2782	mRNA interferase toxin, antitoxin is MazE	2.52809	Fis regulated
proP	fnr	b1334	oxygen-sensing anaerobic growth regulon transcriptional regulator; autorepressor	2.40945	IHF regulated
proW	proP	b4111	proline/glycine betaine transporter	2.34056	Fis regulated
tufB	proW	b2678	glycine betaine transporter subunit	2.21057	IHF regulated
glpQ	tufB	b3980	translation elongation factor EF-Tu 2	2.04539	Fis regulated
rpsO	glpQ	b2239	periplasmic glycerophosphodiester phosphodiesterase	1.99281	Fis regulated
prfA	rpsO	b3165	30S ribosomal subunit protein S15	1.9206	Fis regulated
nusA	prfA	b1211	peptide chain release factor RF-1	1.90273	IHF regulated
mazE	nusA	b3169	transcription termination/antitermination L factor	1.78066	Fis regulated
gltX	mazE	b2783	antitoxin of the ChpA-ChpR toxin-antitoxin system	1.67435	Fis regulated
htrE	gltX	b2400	glutamyl-tRNA synthetase	1.67033	Fis regulated
pnp	htrE	b0139	putative outer membrane usher protein	1.66364	IHF regulated
pspE	pnp	b3164	polynucleotide phosphorylase/polyadenylase	1.62604	Fis regulated
cspA	pspE	b1308	thiosulfate:cyanide sulfurtransferase (rhodanese)	1.60397	IHF regulated
guaB	cspA	b3556	RNA chaperone and antiterminator, cold-inducible	1.56206	Fis regulated
focA	guaB	b2508	IMP dehydrogenase	1.55449	Fis regulated
	focA	b0904	formate channel	1.54524	IHF regulated
